# Supplementary material for: The global, regional, and national burden of maternal hypertensive disorder in 204 countries and territories, 1990–2021: Results from the Global Burden of Disease Study 2021
Source: Research Square preprint supplement (doi:10.21203/rs.3.rs-6415287/v1), 2025-08-08
Supplement: Supplementary file 1 [file 18ca9bbf849642e9204e8d49.docx]

**Table 1.** The incidence cases and ASIR of MHD, alongside the percentage change in ASR per 100,000 population and the EAPC by location from 1990 to 2021.

| Location | 1990 | | 2021 | | Percentage change in ASR from 1990 to 2021 | EAPC (95% CI) |
| --- | --- | --- | --- | --- | --- | --- |
| No, in thousands (95%UI) | ASR per 100000 (95% UI) | No, in thousands (95%UI) | ASR per 100000 (95% UI) |
| Global | 15662895 (12935146,19254514) | 554.4 (461.4,675.4) | 18050085 (15356124,21519204) | 461.9 (392.7,551.7) | -16.7 (-20.7,-13.9) | -0.51 (-0.56,-0.45) |
| Low SDI | 4139304 (3487342,4867143) | 1792.9 (1531.1,2095.2) | 6749882 (5727623,7955523) | 1202.3 (1025.8,1408.9) | -32.9 (-34.1,-31.7) | -1.28 (-1.4,-1.16) |
| Low-middle SDI | 4734331 (3973547,5762419) | 823.9 (699.9,989.1) | 5103004 (4291790,6055102) | 487.2 (411.5,575.6) | -40.9 (-43.2,-38.8) | -1.83 (-1.99,-1.68) |
| Middle SDI | 4056969 (3303930,5098008) | 422.4 (348.9,524.2) | 3701256 (3110328,4468478) | 300.8 (252.7,364.4) | -28.8 (-32.7,-25.3) | -0.72 (-0.88,-0.57) |
| High-middle SDI | 1488518 (1149315,1967034) | 251 (195.6,331.2) | 1249379 (1008834,1562214) | 207.2 (166.9,257.2) | -17.4 (-27.2,-7.1) | 0.05 (-0.31,0.41) |
| High SDI | 1233522 (966651,1612143) | 269.6 (211.6,353.2) | 1235244 (1023404,1513215) | 250.3 (208.4,304.9) | -7.2 (-20.2,6.7) | -0.49 (-0.67,-0.31) |
| East Asia | 1278231 (942274,1787350) | 171.4 (127.4,239.1) | 710146 (548939,920215) | 108.7 (84.2,141) | -36.6 (-44.9,-27.6) | -0.57 (-1.7,0.58) |
| Southeast Asia | 1195302 (945536,1507583) | 477.3 (380.8,599.8) | 1143820 (917858,1420431) | 309.4 (248.4,383.3) | -35.2 (-39.1,-31.7) | -1.33 (-1.39,-1.26) |
| Oceania | 17955 (14074,23015) | 568.4 (449.4,708.8) | 33574 (26578,42939) | 471.7 (376.2,599.7) | -17 (-23.3,-9.6) | -0.72 (-0.76,-0.67) |
| Central Asia | 70848 (56869,89435) | 196.6 (157,248.2) | 91670 (73030,116744) | 180.3 (144.8,228.2) | -8.3 (-15.3,-0.7) | 0.4 (0.11,0.7) |
| Central Europe | 112704 (83118,154106) | 192.5 (141,264.5) | 80855 (66374,100780) | 169.6 (138.9,210.9) | -11.9 (-26.5,4) | -0.29 (-0.64,0.06) |
| Eastern Europe | 429926 (320324,586670) | 405 (296.9,556) | 372397 (286377,479586) | 417.9 (323.6,536) | 3.2 (-12.3,21.6) | 1.12 (0.65,1.59) |
| High-income Asia Pacific | 179029 (141199,232968) | 206.5 (162.4,269.3) | 115278 (98177,135473) | 154.3 (132.3,182.4) | -25.3 (-36.7,-12.5) | -1.52 (-1.99,-1.05) |
| Australasia | 35035 (29359,42314) | 320.6 (269,387.4) | 33846 (26068,42709) | 224.6 (173.8,281.4) | -30 (-39.9,-18.3) | -1.03 (-1.23,-0.84) |
| Western Europe | 372227 (285328,488578) | 190.8 (146.7,250.2) | 387665 (309193,488869) | 208.9 (164.8,263.7) | 9.5 (-2.7,21.4) | 0.41 (0.27,0.54) |
| Southern Latin America | 107883 (82156,140036) | 426.4 (324.5,552.2) | 134877 (113450,162874) | 384.7 (323.3,465.7) | -9.8 (-19.4,2.4) | -0.1 (-0.2,0.01) |
| High-income North America | 581684 (445278,766637) | 392.1 (300.8,522.7) | 626403 (539594,736474) | 369.8 (318.7,434.2) | -5.7 (-25.8,16.4) | -0.48 (-0.71,-0.25) |
| Caribbean | 93720 (74276,120931) | 468.3 (373.9,596.9) | 83402 (67141,104886) | 345.1 (278.2,433) | -26.3 (-30.1,-21.8) | -0.95 (-1.02,-0.87) |
| Andean Latin America | 60879 (54015,69611) | 307.2 (271.7,349.5) | 102409 (95875,110222) | 288.2 (270,309.7) | -6.2 (-12.7,0.6) | -0.16 (-0.36,0.04) |
| Central Latin America | 684950 (574021,824555) | 758.6 (643.3,897.8) | 621918 (545662,717391) | 455 (399.4,524.4) | -40 (-43.2,-36.3) | -0.99 (-1.33,-0.65) |
| Tropical Latin America | 413752 (331185,535494) | 479.5 (385.2,613) | 375061 (321710,447913) | 316.3 (270.8,377.2) | -34 (-41.5,-27.9) | -1.22 (-1.48,-0.96) |
| North Africa and Middle East | 1091557 (866923,1390333) | 687.8 (550.3,868.7) | 1205613 (946504,1540737) | 370.2 (291.9,474.1) | -46.2 (-49,-43.6) | -1.49 (-1.66,-1.33) |
| South Asia | 4018273 (3329687,4920134) | 740.1 (616.2,900.4) | 3478494 (2875246,4288315) | 338.9 (280.7,416.8) | -54.2 (-56.5,-51.8) | -2.8 (-3.17,-2.44) |
| Central Sub-Saharan Africa | 563799 (466899,670890) | 2206 (1861.3,2593.8) | 878783 (721966,1077617) | 1323.6 (1098.6,1609.6) | -40 (-44.4,-35.8) | -1.51 (-1.63,-1.39) |
| Eastern Sub-Saharan Africa | 1976139 (1638189,2341423) | 2217.7 (1859.6,2576.4) | 3087072 (2599544,3620626) | 1408.1 (1198,1626.1) | -36.5 (-37.9,-35) | -1.39 (-1.52,-1.26) |
| Southern Sub-Saharan Africa | 342754 (283702,409228) | 1204.2 (1012.7,1409.8) | 366803 (307516,431852) | 813.5 (681.7,958.3) | -32.4 (-34.7,-30.1) | -1.09 (-1.14,-1.03) |
| Western Sub-Saharan Africa | 2036247 (1723735,2377706) | 2256.2 (1933.9,2588.4) | 4119997 (3534414,4761706) | 1678.1 (1447,1911.4) | -25.6 (-27,-24.2) | -0.84 (-1.03,-0.66) |

MHD: maternal hypertensive disorder; ASR: age-standardized rate; ASIR: age-standardized incidence rate; EAPC: estimated annual percentage change.
