# Supplementary material for: The global, regional, and national burden of maternal hypertensive disorder in 204 countries and territories, 1990–2021: Results from the Global Burden of Disease Study 2021
Source: Research Square preprint supplement (doi:10.21203/rs.3.rs-6415287/v1), 2025-08-08
Supplement: Supplementary file 2 [file d6aef07eb9f2adeac71325db.docx]

**Additional file 1**

**The global, regional, and national burden of maternal hypertensive disorder in 204 countries and territories, 1990–2021: Results from the Global Burden of Disease Study 2021**

**Table S1.** The deaths cases and ASMR of MHD, alongside the percentage change in ASR per 100,000 population and the EAPC by location from 1990 to 2021.

**Table S2.** The DALY cases and ASDR of MHD, alongside the percentage change in ASR per 100,000 population and the EAPC by location from 1990 to 2021.

**Table S3.** The incidence cases and ASIR of MHD in 1990 and 2021, along with the percentage change in the ASR per 100,000 population and the EAPC by location.

**Table S4.** The deaths cases and ASMR of MHD in 1990 and 2021, along with the percentage change in the ASR per 100,000 population and the EAPC by location.

**Table S5.** The DALY cases and ASDR of MHD in 1990 and 2021, along with the percentage change in the ASR per 100,000 population and the EAPC by location.

**Table S6.** Age-specific of the incidence cases and ASIR of MHD in 1990 and 2021, along with the percentage change in the ASR per 100,000 population and the EAPC by location.

**Table S7.** Age-specific of the deaths cases and ASMR of MHD in 1990 and 2021, along with the percentage change in the ASR per 100,000 population and the EAPC by location.

**Table S8.** Age-specific of the DALYs cases and ASDR of MHD in 1990 and 2021, along with the percentage change in the ASR per 100,000 population and the EAPC by location.

**Table S9.** Decomposition analysis for MHD burden by different regions from 1990 to 2021.

**Table S10.** Frontier of MHD incidence and effective difference by location in 2021.

**Table S11.** Frontier of MHD deaths and effective difference by location in 2021.

**Table S12.** Frontier of MHD DALYs and effective difference by location in 2021.

**Figure S1.** Age-standardized incidence rate of MHD in 2021 by country and territory.

**Figure S2.** EAPC in incidence of MHD by country and territory from 1990 to 2021.

**Figure S3.** Number of deaths cases of MHD in 2021 by country and territory.

**Figure S4.** Age-standardized deaths rate of MHD in 2021 by country and territory.

**Figure S5.** EAPC in deaths of MHD by country and territory from 1990 to 2021.

**Figure S6.** Number of DALYs cases of MHD in 2021 by country and territory.

**Figure S7.** Age-standardized DALYs rate of MHD in 2021 by country and territory.

**Figure S8.** EAPC in DALYs of MHD by country and territory from 1990 to 2021.

**Figure S9.** Age-standardized deaths rate for MHD for Global Burden of Disease regions by SDI from 1990–2021.

**Figure S10.** Age-standardized DALYs rate for MHD for Global Burden of Disease regions by SDI from 1990–2021.

**Figure S11.** Age-standardized deaths rate of MHD for 204 countries and territories by SDI in 2021.

**Figure S12.** Age-standardized DALYs rate of MHD for 204 countries and territories by SDI in 2021.

**Figure S13.** The number of MHD burden across different age groups in different regions from 1990 to 2021.

**Figure S14.** EAPC of ASIR, ASMR, and ASDR for MHD from 1990 to 2021 by different age groups and regions.

**Figure S15.** Local drifts of MHD incidence with the age, period, and cohort effects by SDI quintiles, 1992−2021.

**Figure S16.** Local drifts of MHD deaths with the age, period, and cohort effects by SDI quintiles, 1992−2021.

**Figure S17.** Local drifts of MHD DALYs with the age, period, and cohort effects by SDI quintiles, 1992−2021.

**Figure S18.** Decomposition analysis of incidence, deaths, and DALYs due to MHD across different regions from 1990–2021.

**Figure S19.** Frontier analysis based on SDI and age-standardized incidence rate of MHD from 1990 to 2021.

**Figure S20.** Frontier analysis based on SDI and age-standardized deaths rate of MHD from 1990 to 2021.

**Figure S21.** Frontier analysis based on SDI and age-standardized DALYs rate of MHD from 1990 to 2021.

**Table S1.** The deaths cases and ASMR of MHD, alongside the percentage change in ASR per 100,000 population and the EAPC by location from 1990 to 2021.

| Location | 1990 | | 2021 | | Percentage change in ASR from 1990 to 2021 | EAPC (95% CI) |
| --- | --- | --- | --- | --- | --- | --- |
| No, in thousands (95%UI) | ASR per 100000 (95% UI) | No, in thousands (95%UI) | ASR per 100000 (95% UI) |
| Global | 53894 (47676,59819) | 1.9 (1.7,2.2) | 38147 (31879,46096) | 1 (0.8,1.2) | -49.6 (-58.8,-38.4) | -2.16 (-2.21,-2.1) |
| Low SDI | 17872 (15191,20320) | 7.9 (6.7,9) | 18589 (15234,22700) | 3.4 (2.8,4.2) | -57.1 (-66.3,-45.7) | -2.6 (-2.7,-2.5) |
| Low-middle SDI | 23080 (19957,25795) | 4 (3.5,4.5) | 14069 (11322,17616) | 1.4 (1.1,1.7) | -66.2 (-73.7,-57.2) | -3.46 (-3.55,-3.37) |
| Middle SDI | 10548 (9346,11815) | 1.1 (1,1.3) | 4961 (4235,5981) | 0.4 (0.3,0.5) | -64.8 (-70.9,-56.5) | -3.22 (-3.29,-3.15) |
| High-middle SDI | 2022 (1625,2412) | 0.3 (0.3,0.4) | 361 (300,448) | 0.1 (0.1,0.1) | -82.5 (-86.5,-77.2) | -5.33 (-5.45,-5.21) |
| High SDI | 338 (285,397) | 0.1 (0.1,0.1) | 135 (114,163) | 0 (0,0) | -62.6 (-69.8,-53.2) | -2.71 (-2.87,-2.55) |
| East Asia | 1822 (1245,2462) | 0.3 (0.2,0.3) | 194 (140,268) | 0 (0,0) | -88.4 (-92.3,-81.3) | -6.52 (-6.78,-6.26) |
| Southeast Asia | 6405 (5359,7510) | 2.6 (2.1,3) | 3097 (2487,3898) | 0.8 (0.7,1.1) | -67.4 (-74.8,-56.5) | -3.44 (-3.52,-3.36) |
| Oceania | 44 (24,65) | 1.4 (0.8,2) | 79 (54,110) | 1.1 (0.8,1.5) | -19.2 (-49.4,48.3) | -0.57 (-0.77,-0.38) |
| Central Asia | 252 (224,283) | 0.7 (0.6,0.8) | 80 (66,97) | 0.2 (0.1,0.2) | -77.1 (-81.2,-72.3) | -4.53 (-4.84,-4.22) |
| Central Europe | 52 (45,60) | 0.1 (0.1,0.1) | 7 (6,8) | 0 (0,0) | -83.4 (-86.5,-79.5) | -4.88 (-5.3,-4.44) |
| Eastern Europe | 186 (159,211) | 0.2 (0.1,0.2) | 17 (14,21) | 0 (0,0) | -88.7 (-91,-86) | -6.67 (-7.02,-6.31) |
| High-income Asia Pacific | 53 (43,62) | 0.1 (0,0.1) | 7 (6,8) | 0 (0,0) | -84 (-87.6,-79.1) | -5.65 (-5.99,-5.31) |
| Australasia | 4 (3,5) | 0 (0,0) | 1 (1,2) | 0 (0,0) | -75.7 (-82.5,-67.4) | -3.88 (-4.51,-3.25) |
| Western Europe | 87 (77,98) | 0 (0,0.1) | 20 (17,22) | 0 (0,0) | -75.7 (-79.4,-71.2) | -3.99 (-4.28,-3.69) |
| Southern Latin America | 114 (97,135) | 0.5 (0.4,0.5) | 37 (29,46) | 0.1 (0.1,0.1) | -76.6 (-82.7,-68.7) | -3.65 (-3.96,-3.34) |
| High-income North America | 88 (72,108) | 0.1 (0,0.1) | 82 (66,102) | 0 (0,0.1) | -18.2 (-35.6,5.7) | 0.12 (-0.16,0.4) |
| Caribbean | 383 (307,483) | 2 (1.6,2.6) | 511 (326,750) | 2.1 (1.3,3.1) | 2.8 (-32.3,53) | 0.8 (0.58,1.02) |
| Andean Latin America | 643 (548,749) | 3.3 (2.8,3.9) | 337 (248,444) | 0.9 (0.7,1.2) | -71.5 (-79.6,-61) | -4.29 (-4.53,-4.04) |
| Central Latin America | 1128 (1030,1233) | 1.3 (1.2,1.4) | 495 (402,605) | 0.4 (0.3,0.4) | -72 (-77.7,-65.4) | -3.92 (-4.15,-3.69) |
| Tropical Latin America | 1225 (1093,1372) | 1.5 (1.3,1.7) | 345 (299,393) | 0.3 (0.2,0.3) | -81 (-83.8,-77.8) | -4.44 (-4.88,-4) |
| North Africa and Middle East | 4350 (3443,5185) | 2.8 (2.2,3.4) | 1654 (1188,2209) | 0.5 (0.4,0.7) | -81.9 (-86.8,-75.8) | -5.12 (-5.3,-4.93) |
| South Asia | 20401 (17206,23202) | 3.8 (3.2,4.3) | 11967 (8863,15766) | 1.2 (0.9,1.6) | -68.6 (-77.4,-56.5) | -3.92 (-4.11,-3.74) |
| Central Sub-Saharan Africa | 2464 (1735,3273) | 10.2 (7.2,13.4) | 2679 (1860,3718) | 4.2 (2.9,5.8) | -59 (-73.6,-34.5) | -2.08 (-2.4,-1.77) |
| Eastern Sub-Saharan Africa | 7510 (6429,8642) | 9 (7.7,10.4) | 6404 (5098,7877) | 3.1 (2.5,3.8) | -65.5 (-73.4,-56) | -3.24 (-3.38,-3.09) |
| Southern Sub-Saharan Africa | 622 (473,820) | 2.3 (1.8,3.1) | 475 (363,614) | 1.1 (0.8,1.4) | -54 (-68.3,-30.7) | -0.98 (-2.08,0.13) |
| Western Sub-Saharan Africa | 6064 (4654,7378) | 6.5 (5,7.8) | 9660 (7354,12669) | 3.9 (3,5.1) | -39.1 (-56.2,-12.4) | -1.51 (-1.6,-1.43) |

MHD: maternal hypertensive disorder; ASR: age-standardized rate; ASMR: age-standardized mortality rate; EAPC: estimated annual percentage change.

**Table S2.** The DALY cases and ASDR of MHD, alongside the percentage change in ASR per 100,000 population and the EAPC by location from 1990 to 2021.

| Location | 1990 | | 2021 | | Percentage change in ASR from 1990 to 2021 | EAPC (95% CI) |
| --- | --- | --- | --- | --- | --- | --- |
| No, in thousands (95%UI) | ASR per 100000 (95% UI) | No, in thousands (95%UI) | ASR per 100000 (95% UI) |
| Global | 3479885 (3085883,3873201) | 123.2 (109.2,137.4) | 2469637 (2083398,2958213) | 63.5 (53.5,76) | -48.5 (-57.4,-37.9) | -2.1 (-2.15,-2.04) |
| Low SDI | 1134178 (960803,1289414) | 484.9 (412.6,553.4) | 1194635 (983739,1454751) | 210.9 (173.9,255.9) | -56.5 (-65.4,-45.3) | -2.57 (-2.67,-2.47) |
| Low-middle SDI | 1480228 (1288978,1643500) | 253.6 (221.4,282.9) | 888004 (717495,1101565) | 85.5 (69.1,106.1) | -66.3 (-73.4,-57.8) | -3.49 (-3.58,-3.39) |
| Middle SDI | 690767 (607609,780248) | 72.6 (63.9,81.8) | 329587 (282911,391530) | 26.8 (23.1,31.9) | -63 (-69,-55) | -3.05 (-3.12,-2.99) |
| High-middle SDI | 139303 (112428,168990) | 23.8 (19.2,28.9) | 34884 (27185,44882) | 6 (4.7,7.6) | -75 (-80.6,-67.6) | -4.19 (-4.27,-4.1) |
| High SDI | 33250 (26096,42851) | 7.2 (5.7,9.3) | 20491 (14260,29256) | 4.2 (2.9,5.9) | -42.4 (-52.2,-31.6) | -1.7 (-1.81,-1.6) |
| East Asia | 125963 (90448,167330) | 17.5 (12.5,23.2) | 18997 (13979,25375) | 3 (2.2,4) | -83 (-88.2,-74.4) | -5.36 (-5.61,-5.11) |
| Southeast Asia | 404655 (338524,473087) | 158.3 (132.5,184.5) | 194162 (158026,242903) | 52.8 (42.9,66.2) | -66.6 (-73.9,-55.9) | -3.37 (-3.44,-3.29) |
| Oceania | 2858 (1662,4244) | 87.1 (51.6,128.1) | 5144 (3595,7086) | 71.2 (49.9,97.9) | -18.2 (-47.1,40.6) | -0.55 (-0.73,-0.36) |
| Central Asia | 16051 (14253,18012) | 43.8 (38.9,49.1) | 5756 (4747,6995) | 11.5 (9.5,13.8) | -73.8 (-78.4,-68.6) | -4.09 (-4.41,-3.78) |
| Central Europe | 4418 (3638,5460) | 7.5 (6.1,9.3) | 1277 (872,1850) | 2.7 (1.9,4) | -63.5 (-71.9,-53.6) | -2.81 (-3.24,-2.37) |
| Eastern Europe | 16522 (13599,20732) | 15.3 (12.6,19.3) | 5234 (3197,8326) | 5.9 (3.6,9.3) | -61.3 (-72.6,-49) | -2.62 (-2.97,-2.26) |
| High-income Asia Pacific | 4774 (3779,6014) | 5.5 (4.3,6.9) | 1393 (951,2012) | 1.9 (1.3,2.7) | -65.3 (-73.5,-57) | -3.66 (-4.1,-3.23) |
| Australasia | 655 (471,921) | 6 (4.3,8.4) | 444 (270,700) | 3 (1.8,4.7) | -50.6 (-62.4,-38) | -2.08 (-2.32,-1.85) |
| Western Europe | 9219 (7253,12289) | 4.7 (3.7,6.3) | 5300 (3362,8270) | 2.9 (1.8,4.5) | -39.1 (-53.2,-25.6) | -1.36 (-1.51,-1.2) |
| Southern Latin America | 8168 (6944,9670) | 32.3 (27.4,38.2) | 3729 (2812,4885) | 10.7 (8.1,14.1) | -66.7 (-74.4,-58.2) | -2.79 (-3.02,-2.56) |
| High-income North America | 11437 (8401,15916) | 7.7 (5.7,10.8) | 11120 (7956,14920) | 6.6 (4.7,8.8) | -14.8 (-28.8,2) | -0.32 (-0.51,-0.13) |
| Caribbean | 24004 (19494,29614) | 124.7 (100.3,154.5) | 30763 (19909,44682) | 126.4 (81.9,183.6) | 1.4 (-31.9,47.2) | 0.75 (0.53,0.96) |
| Andean Latin America | 39982 (34224,46689) | 200.7 (171.4,233.3) | 20884 (15654,27162) | 58.7 (44,76.4) | -70.8 (-79,-60.7) | -4.19 (-4.41,-3.96) |
| Central Latin America | 76045 (68349,83482) | 84.5 (76.2,92.7) | 35211 (29062,42472) | 25.7 (21.2,31) | -69.6 (-74.9,-63.4) | -3.61 (-3.82,-3.39) |
| Tropical Latin America | 77629 (69713,86526) | 93.6 (84.2,104.3) | 24210 (20615,27912) | 20.4 (17.5,23.5) | -78.2 (-81.3,-74.9) | -4.06 (-4.48,-3.64) |
| North Africa and Middle East | 272820 (219474,324251) | 172.3 (138.4,204.4) | 112009 (84543,145990) | 34.8 (26.2,45.3) | -79.8 (-84.7,-73.5) | -4.78 (-4.97,-4.59) |
| South Asia | 1315573 (1116161,1497912) | 239.3 (203.5,272.2) | 746671 (559140,976528) | 73.6 (55.2,96.3) | -69.3 (-77.5,-57.9) | -4 (-4.19,-3.81) |
| Central Sub-Saharan Africa | 153719 (108575,202463) | 611.2 (436.5,800.3) | 169383 (120040,232144) | 255.2 (182.1,348.3) | -58.2 (-72.5,-34.4) | -2.06 (-2.37,-1.76) |
| Eastern Sub-Saharan Africa | 470623 (406953,536555) | 540.9 (467.4,619.5) | 411016 (334512,500683) | 191.5 (155,233.3) | -64.6 (-72,-55.5) | -3.17 (-3.31,-3.02) |
| Southern Sub-Saharan Africa | 41239 (32037,53875) | 149.5 (115.6,196.2) | 31625 (24643,39964) | 70.9 (55.3,89.6) | -52.6 (-66.4,-31.5) | -1.05 (-2.04,-0.05) |
| Western Sub-Saharan Africa | 403528 (314574,491338) | 419.3 (330,508.3) | 635307 (496632,820756) | 251.7 (196.2,325.4) | -40 (-56.2,-15.5) | -1.57 (-1.65,-1.49) |

MHD: maternal hypertensive disorder; ASR: age-standardized rate; DALY: disability-adjusted life years; ASDR: age-standardized DALYs rate; EAPC: estimated annual percentage change.

**Table S3.** The incidence cases and ASIR of MHD in 1990 and 2021, along with the percentage change in the ASR per 100,000 population and the EAPC by location.

| Location | 1990 | | 2021 | | Percentage change in the ASR per 100,000 | EAPC (95% CI) |
| --- | --- | --- | --- | --- | --- | --- |
| No (95% UI) | ASR per 100,000 (95% UI) | No (95% UI) | ASR per 100,000 (95% UI) |
| Afghanistan | 29732 (23342,39207) | 740.4 (574.4,959.8) | 72692 (56378,94863) | 522.4 (405,657.1) | -29.4 (-37.4,-19.5) | -0.96 (-1.03,-0.89) |
| Albania | 4273 (3137,5855) | 229.7 (169.8,312.9) | 2007 (1449,2634) | 161.6 (117.3,212) | -29.7 (-41.2,-19) | -1.09 (-1.36,-0.81) |
| Algeria | 60924 (46593,79453) | 564.4 (434.7,734.7) | 95654 (70118,125226) | 391.7 (287.9,508.1) | -30.6 (-39.1,-21.7) | -0.41 (-0.83,0) |
| American Samoa | 238 (186,315) | 925.7 (729.2,1195.4) | 128 (102,164) | 594.3 (467.5,759.5) | -35.8 (-43.6,-28) | -1.58 (-1.74,-1.43) |
| Andorra | 41 (30,54) | 123.6 (90.8,164.5) | 48 (35,64) | 121.1 (89.6,161.8) | -2 (-20.1,17.1) | -0.03 (-0.09,0.03) |
| Angola | 104004 (84774,126430) | 2179.4 (1798.5,2613.8) | 216188 (177742,266094) | 1378.6 (1138.1,1676.7) | -36.7 (-41.6,-31.1) | -1.39 (-1.5,-1.28) |
| Antigua and Barbuda | 115 (89,149) | 327.5 (253.6,418.7) | 105 (83,132) | 223.4 (176.2,281.6) | -31.8 (-39.6,-22.9) | -1.45 (-1.52,-1.38) |
| Argentina | 69104 (52344,88758) | 428.5 (324.7,550.1) | 88360 (68385,115001) | 371.3 (286.4,486.1) | -13.4 (-24.4,-1) | -0.27 (-0.37,-0.17) |
| Armenia | 2169 (1718,2745) | 113.9 (90.2,144.9) | 1596 (1217,2082) | 104.5 (80.8,134.8) | -8.2 (-27.5,12.9) | 0.46 (-0.06,0.99) |
| Australia | 24958 (21035,29528) | 274.3 (231.5,324.7) | 26470 (19517,34525) | 209.9 (155.6,271.9) | -23.5 (-38.2,-6.8) | -0.61 (-0.97,-0.25) |
| Austria | 3696 (3633,3764) | 89.3 (87.8,90.9) | 3060 (2967,3158) | 75 (72.7,77.3) | -16.1 (-18.7,-13.4) | -0.75 (-0.95,-0.54) |
| Azerbaijan | 6246 (4893,8132) | 147.1 (116.7,189.5) | 5682 (4511,7091) | 104 (83.3,130.3) | -29.3 (-40.8,-14.8) | -0.29 (-0.68,0.1) |
| Bahamas | 615 (486,805) | 388.6 (307.2,504.1) | 518 (411,661) | 245 (193.9,314) | -37 (-43.4,-27.8) | -0.96 (-1.23,-0.69) |
| Bahrain | 1311 (960,1708) | 523.5 (398.7,666.9) | 1865 (1422,2395) | 276.9 (212,355.7) | -47.1 (-53.4,-39.9) | -1.88 (-2.17,-1.58) |
| Bangladesh | 364292 (293627,453054) | 665.3 (543.3,822) | 263984 (210560,331856) | 276 (220.8,347.1) | -58.5 (-63.2,-53.5) | -2.83 (-2.87,-2.79) |
| Barbados | 535 (419,710) | 367.1 (289.1,486.5) | 349 (278,450) | 257.9 (205.1,334.4) | -29.7 (-37.8,-20.9) | -1.25 (-1.46,-1.04) |
| Belarus | 14751 (10410,20738) | 293.1 (203.9,416.9) | 12014 (8883,16327) | 304.7 (225,420.5) | 4 (-15.2,28.7) | 0.53 (0.12,0.94) |
| Belgium | 12119 (8781,16388) | 240.1 (174.1,326.5) | 13997 (10178,19304) | 280.8 (204.4,386) | 17 (-3.8,40.4) | 0.43 (0.25,0.6) |
| Belize | 664 (516,873) | 721.4 (559.3,926.1) | 973 (776,1271) | 386.3 (306.3,501.7) | -46.5 (-53.3,-39.5) | -1.84 (-2.05,-1.64) |
| Benin | 50373 (42013,60261) | 2187.8 (1851.2,2569.6) | 134233 (112615,157257) | 2006.7 (1709.1,2305.9) | -8.3 (-15.5,0.7) | -0.08 (-0.15,-0.01) |
| Bermuda | 129 (99,171) | 363.5 (282.4,477.8) | 80 (64,101) | 292.1 (234.6,372) | -19.6 (-30.3,-6.6) | -0.71 (-0.86,-0.56) |
| Bhutan | 2135 (1722,2789) | 700.4 (564.4,901.2) | 1322 (1011,1728) | 302.3 (232.4,395.6) | -56.8 (-62.5,-49.9) | -3.09 (-3.27,-2.91) |
| Bolivia (Plurinational State of) | 15608 (12622,19629) | 493.6 (397,620.3) | 17347 (14075,21491) | 270.8 (220.2,335.1) | -45.1 (-51.6,-37.9) | -1.98 (-2.01,-1.94) |
| Bosnia and Herzegovina | 3385 (2467,4572) | 139.4 (101.6,188.3) | 1785 (1289,2327) | 131.3 (95.6,169.8) | -5.8 (-21.9,13.6) | 0.02 (-0.27,0.32) |
| Botswana | 9233 (7404,11444) | 1367.6 (1113.7,1661.5) | 9980 (8118,11718) | 704.1 (570.5,827.7) | -48.5 (-53.2,-43.1) | -2.09 (-2.16,-2.03) |
| Brazil | 402405 (321898,521510) | 477.4 (383.3,612.1) | 358941 (308892,428407) | 313.3 (268.7,372.7) | -34.4 (-42.2,-28) | -1.24 (-1.5,-0.97) |
| Brunei Darussalam | 273 (213,364) | 185.5 (145.5,245.4) | 330 (255,418) | 124.5 (97,157.9) | -32.9 (-42.3,-21.9) | -1.56 (-1.75,-1.36) |
| Bulgaria | 5174 (3749,7229) | 138.1 (99.6,193.9) | 3229 (2446,4268) | 128.1 (97.4,169) | -7.2 (-26.2,19.4) | 0.46 (0.11,0.81) |
| Burkina Faso | 100004 (83407,119295) | 2361.3 (1997.3,2781.9) | 223428 (186737,263470) | 1984.5 (1681.2,2324.6) | -16 (-22.5,-9.9) | -0.65 (-0.7,-0.61) |
| Burundi | 58905 (48511,68850) | 2261.7 (1890.4,2618.1) | 101360 (83147,121022) | 1604.7 (1320.3,1899.7) | -29.1 (-35.2,-23.1) | -1.02 (-1.15,-0.9) |
| Cabo Verde | 2560 (2121,3041) | 1549 (1301.2,1803.1) | 2701 (2290,3122) | 841.4 (714.8,973.1) | -45.7 (-50.4,-40.5) | -2 (-2.16,-1.84) |
| Cambodia | 36387 (28448,46652) | 726.8 (571.4,922.5) | 34347 (26384,43737) | 361.5 (279.1,459.4) | -50.3 (-57.1,-42.6) | -2.4 (-2.6,-2.21) |
| Cameroon | 109881 (92310,129342) | 2205 (1875.7,2547.1) | 261602 (226777,302313) | 1589.5 (1387.4,1824.7) | -27.9 (-33.1,-22.8) | -0.86 (-0.98,-0.73) |
| Canada | 17620 (14693,20866) | 114.6 (95.7,134.8) | 6650 (4917,8967) | 39.2 (28.9,52.5) | -65.8 (-73.5,-54.4) | -2.6 (-3.69,-1.5) |
| Central African Republic | 26206 (21029,32384) | 1948.4 (1598.8,2369.9) | 34666 (27851,43337) | 1214.9 (977.1,1503.7) | -37.6 (-43.6,-31.3) | -1.47 (-1.6,-1.34) |
| Chad | 66986 (54978,79533) | 2433.4 (2020.3,2840.2) | 168274 (138880,203194) | 2138.4 (1783.7,2544.8) | -12.1 (-19.1,-4.7) | -0.38 (-0.45,-0.31) |
| Chile | 33146 (24642,44142) | 431.8 (323.7,571) | 40484 (40055,40924) | 418.4 (414.1,422.8) | -3.1 (-27,29.2) | 0.29 (-0.15,0.73) |
| China | 1248644 (918051,1748462) | 173 (128.6,241.6) | 691387 (534286,895789) | 110.1 (85.2,142.5) | -36.3 (-44.7,-27.1) | -0.53 (-1.7,0.65) |
| Colombia | 64131 (54189,77187) | 345.9 (292,413.1) | 67551 (57073,80795) | 254.8 (216.3,303.8) | -26.3 (-34.2,-18) | -1.1 (-1.22,-0.98) |
| Comoros | 4702 (3935,5481) | 2235.8 (1903.1,2566.5) | 4183 (3525,4845) | 1052.3 (891.6,1214.2) | -52.9 (-56.2,-49.8) | -2.47 (-2.49,-2.45) |
| Congo | 19153 (15560,22811) | 1648.5 (1376.4,1928.8) | 28079 (23430,33174) | 963.7 (808.3,1136.3) | -41.5 (-46.5,-37.1) | -1.51 (-1.74,-1.28) |
| Cook Islands | 47 (35,62) | 492.6 (374.9,650.3) | 29 (23,37) | 348.8 (274.7,447.4) | -29.2 (-39.6,-19.1) | -1.46 (-1.57,-1.35) |
| Costa Rica | 6571 (5334,8157) | 393.2 (320.2,481.6) | 6697 (5660,8078) | 256.1 (217.3,308.6) | -34.9 (-43.1,-27.4) | -1.34 (-1.54,-1.14) |
| C么te d'Ivoire | 123309 (101461,146223) | 2161.8 (1815.1,2510.2) | 212759 (178702,252452) | 1532.4 (1292.8,1796.2) | -29.1 (-33.7,-23.8) | -0.9 (-0.97,-0.83) |
| Croatia | 2440 (1818,3253) | 105 (78.1,141.3) | 1763 (1686,1854) | 102.5 (98.1,107.9) | -2.3 (-26.4,30.6) | 1.03 (0.67,1.38) |
| Cuba | 19742 (14780,26971) | 298 (225.9,399.2) | 12604 (9787,16577) | 274.5 (214.6,365) | -7.9 (-19.2,4.3) | 0.22 (0.03,0.4) |
| Cyprus | 525 (386,700) | 130.1 (96.1,173.8) | 714 (514,953) | 89.5 (66.3,119.5) | -31.2 (-45.4,-12.4) | -1.24 (-1.93,-0.55) |
| Czechia | 9667 (6824,13289) | 214.2 (148.9,295.4) | 10258 (7425,13641) | 242.6 (174.8,321.5) | 13.3 (-12.4,52) | 0.96 (0.43,1.48) |
| Democratic People's Republic of Korea | 18673 (13737,26206) | 158.6 (117,218.3) | 10257 (7580,13833) | 77.2 (57,103.7) | -51.4 (-58.3,-44.1) | -2.23 (-2.35,-2.11) |
| Democratic Republic of the Congo | 402455 (331481,478047) | 2284.6 (1920.5,2666.3) | 580803 (473453,712581) | 1347.7 (1108.5,1641.8) | -41 (-46.8,-35.6) | -1.54 (-1.67,-1.41) |
| Denmark | 1820 (1362,2331) | 71.9 (53.7,92.3) | 2220 (1678,2863) | 88.4 (66.7,113.5) | 22.9 (0.6,45.7) | 1.94 (1.42,2.47) |
| Djibouti | 4062 (3375,4799) | 2060.8 (1732.3,2407.3) | 8643 (7318,10022) | 1284.7 (1082.9,1488.1) | -37.7 (-41.9,-32.8) | -1.47 (-1.57,-1.36) |
| Dominica | 237 (183,305) | 661.2 (515.9,852.1) | 110 (88,141) | 331 (265.5,424.7) | -49.9 (-56.8,-43.1) | -2.57 (-2.74,-2.41) |
| Dominican Republic | 22274 (17405,29308) | 519.3 (410.3,672.9) | 23955 (18781,31513) | 400.5 (315.2,524.7) | -22.9 (-32.1,-12.8) | -0.99 (-1.1,-0.87) |
| Ecuador | 22785 (22267,23485) | 429.4 (420,441.5) | 62428 (61725,63204) | 650.1 (642.9,658.3) | 51.4 (48.1,54.5) | 1.63 (1.5,1.75) |
| Egypt | 202396 (163507,260985) | 747.9 (605.2,959.2) | 253062 (201555,329378) | 468.6 (374.2,610.5) | -37.3 (-45.7,-27.9) | -1.15 (-1.32,-0.99) |
| El Salvador | 11894 (9856,14481) | 425.1 (355.2,520.4) | 9166 (7745,11025) | 255 (215.5,304.3) | -40 (-46.5,-33.4) | -1.86 (-2.03,-1.68) |
| Equatorial Guinea | 4258 (3502,5160) | 2087.1 (1738.6,2520.4) | 8849 (7637,10070) | 1129.8 (980.3,1277.3) | -45.9 (-52.4,-37.5) | -1.9 (-2.08,-1.72) |
| Eritrea | 33425 (27547,39553) | 2127.8 (1772.4,2479) | 44310 (36412,52880) | 1309.6 (1085.3,1552.5) | -38.5 (-43.3,-33.3) | -1.54 (-1.61,-1.48) |
| Estonia | 2702 (1996,3859) | 378.7 (276,547.4) | 2334 (1770,3117) | 416.1 (314.1,555.1) | 9.9 (-14.5,39) | 1.3 (0.92,1.68) |
| Eswatini | 7391 (6133,8803) | 1780.1 (1507.5,2072.4) | 6900 (5824,8060) | 1014.8 (858.9,1176.9) | -43 (-47.1,-38.7) | -1.82 (-1.88,-1.77) |
| Ethiopia | 548359 (452047,662694) | 2330.6 (1950.7,2776.6) | 791316 (666525,919679) | 1416.2 (1201.5,1643.7) | -39.2 (-43.1,-35.5) | -1.67 (-1.79,-1.55) |
| Fiji | 1630 (1243,2129) | 392.8 (300.8,509.6) | 2204 (1727,2884) | 478 (374.2,625.6) | 21.7 (4.5,39.1) | 0.61 (0.55,0.67) |
| Finland | 5447 (3921,7327) | 219.7 (158.5,297.2) | 4830 (3473,6397) | 207.9 (150.5,276.4) | -5.4 (-19.4,11.6) | -0.71 (-0.96,-0.46) |
| France | 54905 (40134,73986) | 187 (136.9,253.3) | 66715 (48933,89292) | 243.9 (177.2,327.6) | 30.4 (7.2,57.3) | 0.72 (0.6,0.85) |
| Gabon | 7723 (6251,9392) | 1648.2 (1359.9,1956.6) | 10199 (8659,11889) | 999.6 (855.5,1151.5) | -39.4 (-44.6,-32.8) | -1.48 (-1.64,-1.31) |
| Gambia | 9593 (7852,11558) | 2001 (1668.5,2355.1) | 18510 (15394,21756) | 1491 (1257.4,1727.8) | -25.5 (-31.3,-19.2) | -0.94 (-1.05,-0.82) |
| Georgia | 1823 (1458,2265) | 63.8 (51.4,79.2) | 1223 (1158,1283) | 74.6 (70.3,78.6) | 17 (-4,43.5) | 1.23 (0.94,1.52) |
| Germany | 92615 (68364,124996) | 224.1 (166.8,301.8) | 108890 (80896,146295) | 303 (227.2,406.6) | 35.2 (9.4,61.4) | 0.87 (0.56,1.17) |
| Ghana | 128442 (105895,154360) | 1779.5 (1486.3,2100.3) | 253247 (215883,291946) | 1327.7 (1139.7,1520.5) | -25.4 (-32.7,-16.1) | -2.07 (-2.72,-1.41) |
| Greece | 6249 (4542,8518) | 125.1 (91,170.6) | 6183 (4545,8095) | 148.2 (108.8,196.2) | 18.4 (-3.6,43.7) | 0.82 (0.65,0.99) |
| Greenland | 40 (29,54) | 115.8 (86.6,154.7) | 30 (22,41) | 111 (83.1,151.5) | -4.1 (-20.9,15.2) | -0.07 (-0.11,-0.03) |
| Grenada | 208 (162,273) | 486.4 (381.1,631.2) | 149 (116,190) | 289.5 (225.9,366.1) | -40.5 (-48.1,-33) | -1.88 (-1.96,-1.81) |
| Guam | 428 (326,554) | 560.9 (430.2,720.4) | 433 (339,558) | 617.4 (483,795) | 10.1 (-6.4,26.9) | 0.47 (0.3,0.64) |
| Guatemala | 13312 (11549,15593) | 352.3 (305.6,408.9) | 14478 (12355,16843) | 156.2 (134.3,181.3) | -55.7 (-62.1,-49.4) | -2.98 (-3.2,-2.76) |
| Guinea | 63671 (53310,75649) | 2243.1 (1894.6,2627.9) | 107564 (90255,126590) | 1558.2 (1324.9,1808.5) | -30.5 (-36.1,-25.7) | -1.15 (-1.17,-1.13) |
| Guinea-Bissau | 9959 (8236,11797) | 2109.6 (1765.4,2477.1) | 16025 (13432,18985) | 1482.5 (1254.2,1742.5) | -29.7 (-35.2,-24.8) | -1.14 (-1.22,-1.05) |
| Guyana | 2434 (1843,3172) | 527.7 (403.3,678.7) | 1493 (1181,1899) | 354.6 (279.5,449.6) | -32.8 (-41.8,-22.3) | -1.42 (-1.46,-1.37) |
| Haiti | 23514 (18569,29872) | 746 (585.4,937.5) | 29323 (23012,36809) | 399.6 (314,500.1) | -46.4 (-51.8,-40.6) | -2.08 (-2.17,-1.99) |
| Honduras | 12245 (10217,15179) | 562.1 (465.1,688.3) | 16201 (13768,19638) | 274.8 (234.1,330.9) | -51.1 (-56,-46.3) | -2.48 (-2.62,-2.33) |
| Hungary | 4364 (3282,5941) | 96.9 (71.9,133.4) | 3749 (2848,4796) | 95.9 (74.1,123.9) | -1 (-22.7,23.8) | 0.47 (-0.04,0.98) |
| Iceland | 222 (166,295) | 162.1 (121.5,214.4) | 252 (185,335) | 154.9 (114.4,206.3) | -4.4 (-18.9,14.8) | -0.4 (-0.84,0.05) |
| India | 3021734 (2495809,3727680) | 701.5 (580.2,859.4) | 2294414 (1878420,2835343) | 292.9 (239.9,361.4) | -58.2 (-61.1,-55.3) | -3.11 (-3.6,-2.62) |
| Indonesia | 537786 (425173,698331) | 534.3 (421,685.8) | 450042 (373345,546314) | 295.8 (245.6,359) | -44.6 (-51.9,-38.5) | -1.98 (-2.15,-1.81) |
| Iran (Islamic Republic of) | 194143 (150413,259121) | 759.8 (587.1,983.7) | 157534 (118858,206520) | 325 (247.2,429.1) | -57.2 (-59.5,-54.9) | -1.04 (-1.75,-0.31) |
| Iraq | 72665 (56184,94244) | 900.4 (697.2,1147.4) | 84500 (63355,111007) | 398 (299.2,521.4) | -55.8 (-61.3,-49.3) | -2.51 (-2.57,-2.45) |
| Ireland | 2134 (1581,2843) | 121.8 (90.2,162.6) | 2979 (2218,3909) | 128.1 (95.9,167.8) | 5.2 (-14.1,24.3) | 0.25 (0.14,0.36) |
| Israel | 6129 (5541,6721) | 249.7 (225.3,274.2) | 13006 (9488,17121) | 299.3 (217.3,395.3) | 19.9 (-8.9,50.5) | -0.17 (-0.61,0.27) |
| Italy | 45240 (33880,59372) | 157.9 (118.4,205.9) | 25167 (22258,28956) | 107.7 (95,123.8) | -31.8 (-45.4,-14.5) | -1.28 (-1.41,-1.16) |
| Jamaica | 6210 (4815,8263) | 466.6 (364.5,619.2) | 4077 (3245,5170) | 257.3 (206,325) | -44.9 (-52.2,-37) | -2.12 (-2.2,-2.04) |
| Japan | 166240 (130572,218078) | 295.7 (230.5,389.2) | 103946 (89366,122178) | 217.6 (188.1,257.1) | -26.4 (-38.3,-13) | -1.51 (-1.98,-1.03) |
| Jordan | 4659 (3651,6182) | 298.8 (232.3,394) | 10049 (7771,13362) | 165.5 (127.7,220.3) | -44.6 (-52.6,-35.2) | -1.91 (-2.01,-1.81) |
| Kazakhstan | 21502 (16516,27422) | 243.5 (188,310.7) | 32106 (25018,42480) | 321 (249.9,420.3) | 31.8 (11.3,57.8) | 2.24 (1.75,2.74) |
| Kenya | 221391 (183478,263999) | 2010 (1688.2,2341) | 320389 (269390,378516) | 1139.9 (959.8,1327.4) | -43.3 (-44.3,-42.1) | -1.63 (-1.69,-1.58) |
| Kiribati | 238 (181,313) | 605.4 (462.8,786.9) | 295 (225,382) | 446.1 (341.9,578.8) | -26.3 (-34,-17.5) | -1.14 (-1.26,-1.02) |
| Kuwait | 4035 (3038,5317) | 444.2 (337.7,577.6) | 7747 (5997,9990) | 232.6 (182.1,298.5) | -47.6 (-54.1,-40.2) | -2.23 (-2.65,-1.82) |
| Kyrgyzstan | 4306 (3376,5589) | 193.6 (151.3,250.3) | 5787 (4386,7524) | 160.5 (121.9,207.8) | -17.1 (-28.8,-4.3) | 0.4 (0.05,0.76) |
| Lao People's Democratic Republic | 13729 (10749,17353) | 720.4 (562,895.5) | 15118 (11869,18983) | 362.6 (286,453.8) | -49.7 (-55.5,-42.5) | -2.6 (-2.78,-2.43) |
| Latvia | 4421 (3219,6243) | 359.3 (261.8,508.2) | 2800 (2098,3747) | 368.9 (275.1,492.2) | 2.7 (-16.7,29.9) | 0.3 (-0.38,0.98) |
| Lebanon | 7409 (5610,9877) | 476.1 (362.5,629.1) | 7532 (5617,9942) | 239.9 (180.8,311.7) | -49.6 (-56.4,-42.9) | -2.24 (-2.37,-2.11) |
| Lesotho | 10924 (8797,13277) | 1414.9 (1151.2,1713.3) | 8726 (7148,10658) | 803.4 (664,967.6) | -43.2 (-48.1,-38.3) | -1.86 (-1.91,-1.82) |
| Liberia | 26619 (22264,31460) | 2281.7 (1928.3,2662.4) | 39176 (32997,45682) | 1395.3 (1188.3,1612.9) | -38.8 (-43,-34.5) | -1.46 (-1.55,-1.38) |
| Libya | 12151 (9262,15931) | 698.9 (535.5,907) | 9135 (6938,11945) | 222.6 (168.3,292) | -68.1 (-72.4,-63.3) | -3.47 (-3.58,-3.36) |
| Lithuania | 8034 (5843,11412) | 438.5 (319.5,624.3) | 4574 (3386,6073) | 401.9 (298.8,532) | -8.4 (-25.9,12.7) | -1.22 (-2,-0.44) |
| Luxembourg | 118 (91,151) | 56.6 (44,72.1) | 184 (144,238) | 55.2 (43.3,70.7) | -2.5 (-19.1,17.7) | -0.13 (-0.38,0.12) |
| Madagascar | 111338 (90984,133343) | 1983.8 (1646.4,2321.8) | 167968 (136424,201142) | 1116.5 (919.2,1320) | -43.7 (-48,-39.8) | -1.73 (-1.89,-1.57) |
| Malawi | 106722 (86996,126991) | 2279.5 (1889,2659.9) | 133235 (109167,158927) | 1303.4 (1089.1,1516.5) | -42.8 (-46.3,-38.3) | -1.78 (-1.97,-1.59) |
| Malaysia | 46732 (35606,61279) | 506.6 (388.9,665.7) | 69119 (52562,89306) | 388.4 (295.7,500.5) | -23.3 (-34,-12.3) | -1 (-1.12,-0.87) |
| Maldives | 683 (525,880) | 734.4 (570.1,931.8) | 787 (590,1024) | 310.6 (234.8,403.9) | -57.7 (-63.2,-51.7) | -2.41 (-2.85,-1.97) |
| Mali | 90024 (73925,106495) | 2286.1 (1895,2684.5) | 219470 (182552,264430) | 1981.7 (1667,2332.8) | -13.3 (-19.3,-6) | -0.4 (-0.45,-0.34) |
| Malta | 394 (286,527) | 214.4 (154.7,289) | 371 (273,493) | 191.7 (140.4,253.6) | -10.6 (-23.8,4.8) | -1.32 (-1.9,-0.73) |
| Marshall Islands | 102 (79,135) | 482.1 (372.2,634.4) | 105 (81,135) | 352.7 (270.6,451.4) | -26.8 (-35.5,-17.5) | -0.98 (-1.02,-0.94) |
| Mauritania | 21254 (18002,24722) | 2220.4 (1898.2,2524.5) | 29865 (25848,33915) | 1390.2 (1212.4,1558.7) | -37.4 (-42.2,-32.2) | -1.32 (-1.45,-1.19) |
| Mauritius | 1896 (1416,2564) | 292 (218.3,392.4) | 1443 (1106,1855) | 233.6 (179.2,301.4) | -20 (-33.4,-6.9) | -0.79 (-0.86,-0.72) |
| Mexico | 520451 (422079,636312) | 1104.3 (912.3,1325.3) | 451237 (390747,522944) | 648.9 (561.6,752.5) | -41.2 (-45.1,-36.9) | -0.73 (-1.2,-0.27) |
| Micronesia (Federated States of) | 307 (237,389) | 670.2 (522,853.3) | 219 (170,277) | 427.2 (327.1,541.3) | -36.3 (-43.1,-29.8) | -1.51 (-1.59,-1.44) |
| Monaco | 22 (16,29) | 166.9 (123.4,221.1) | 25 (18,34) | 186.9 (135.2,251) | 12 (-4.9,30.6) | 0.34 (0.33,0.35) |
| Mongolia | 2365 (1859,3034) | 234 (180.3,298.6) | 3618 (2753,4746) | 204.2 (158.3,266) | -12.7 (-25,1.4) | 0.73 (0.06,1.39) |
| Montenegro | 642 (476,863) | 200.3 (148.8,269) | 551 (395,732) | 199.2 (143.8,264.9) | -0.5 (-15.8,18.1) | 0.18 (0.03,0.34) |
| Morocco | 72394 (56703,93518) | 580.4 (460.6,739.3) | 57023 (43997,72312) | 289.1 (223.1,367.2) | -50.2 (-55.8,-44.7) | -2.09 (-2.19,-1.99) |
| Mozambique | 128052 (105267,151398) | 1994.6 (1655.6,2326.2) | 230761 (192096,275478) | 1465.5 (1221.2,1713.3) | -26.5 (-31.4,-19.8) | -0.89 (-1.01,-0.77) |
| Myanmar | 92891 (72752,117150) | 449.1 (348.7,568.1) | 93213 (72058,120535) | 309.9 (239.3,400.7) | -31 (-39.1,-22.5) | -0.9 (-1.01,-0.79) |
| Namibia | 10627 (8530,12816) | 1529.1 (1246,1827) | 12383 (10073,15101) | 891.2 (728.7,1081.8) | -41.7 (-46.3,-36) | -1.48 (-1.57,-1.38) |
| Nauru | 39 (30,50) | 761.8 (596.9,976.3) | 33 (26,43) | 563.1 (442.2,728.3) | -26.1 (-33.8,-18) | -1.14 (-1.26,-1.03) |
| Nepal | 73525 (59012,94410) | 756.1 (607.8,959.7) | 52942 (39960,71317) | 269.4 (205.4,357.9) | -64.4 (-69.7,-57.9) | -3.91 (-4.23,-3.59) |
| Netherlands | 7274 (5203,9592) | 89 (63.7,117.5) | 7624 (5632,10146) | 104 (76.7,138.1) | 16.8 (-4,40.9) | 0.65 (0.39,0.9) |
| New Zealand | 10077 (7593,13059) | 544.8 (411.7,706.8) | 7376 (6206,8964) | 297.9 (251.8,358.5) | -45.3 (-55,-34.1) | -1.97 (-2.28,-1.67) |
| Nicaragua | 9227 (7566,11475) | 468.7 (383.5,574) | 10062 (8527,12156) | 269.2 (227.8,324.4) | -42.6 (-48.6,-35.4) | -1.67 (-1.88,-1.45) |
| Niger | 85242 (69247,104515) | 2399.7 (1982.3,2877.8) | 228984 (184245,279852) | 2175.7 (1763.5,2598.5) | -9.3 (-17.1,-1.1) | -0.28 (-0.32,-0.24) |
| Nigeria | 988305 (840343,1153139) | 2344.3 (2017.7,2683.8) | 1982763 (1720437,2276536) | 1694.8 (1474.2,1919.3) | -27.7 (-29.5,-26) | -0.8 (-1.11,-0.48) |
| Niue | 5 (3,6) | 465.5 (346.1,612.7) | 3 (2,4) | 413.9 (319.7,536.7) | -11.1 (-23.3,3.8) | -0.21 (-0.28,-0.14) |
| North Macedonia | 1922 (1438,2639) | 186.5 (139.8,256) | 1522 (1108,2006) | 146.1 (105.8,192.8) | -21.7 (-37.2,-2.8) | -0.74 (-0.96,-0.53) |
| Northern Mariana Islands | 166 (127,220) | 529.7 (407.9,697.4) | 89 (70,114) | 431.8 (339.7,562.1) | -18.5 (-28.6,-9) | -0.86 (-0.98,-0.75) |
| Norway | 8178 (6042,10758) | 389.6 (287.5,512.1) | 7118 (5419,9479) | 287.7 (218.5,382.9) | -26.2 (-38.3,-13.2) | -1.34 (-1.87,-0.81) |
| Oman | 4329 (3261,5700) | 649.9 (495,843) | 8047 (6066,10577) | 347.2 (265.6,451.5) | -46.6 (-55.2,-38.2) | -1.82 (-1.88,-1.76) |
| Pakistan | 556587 (462141,680864) | 1166.2 (961.7,1426.2) | 865832 (701805,1080275) | 679.2 (552.7,842.4) | -41.8 (-46,-37.9) | -1.99 (-2.1,-1.89) |
| Palau | 33 (26,43) | 392 (303.9,501.2) | 26 (20,33) | 399.6 (308.9,516.8) | 1.9 (-11.4,16.2) | 0.12 (0.08,0.17) |
| Palestine | 5801 (4513,7673) | 643.7 (496.8,826.8) | 7868 (6045,10203) | 286.3 (219.3,371.2) | -55.5 (-61.7,-47.9) | -3.42 (-3.79,-3.04) |
| Panama | 3856 (3206,4795) | 293.2 (242.9,363.9) | 5975 (5061,7262) | 278.3 (236.1,338.2) | -5.1 (-14.3,6.5) | -0.07 (-0.22,0.08) |
| Papua New Guinea | 11130 (8649,14308) | 575.1 (455.5,718.6) | 24843 (19640,32022) | 462 (366.9,593.2) | -19.7 (-28.5,-10.7) | -0.83 (-0.91,-0.75) |
| Paraguay | 11347 (8867,14210) | 570.7 (449,711.9) | 16119 (12669,20422) | 408.6 (322,517.3) | -28.4 (-37.4,-19.6) | -0.86 (-0.95,-0.77) |
| Peru | 22486 (18128,28037) | 197.6 (160.1,244.5) | 22634 (19048,26961) | 115.4 (97.6,137) | -41.6 (-49.3,-33.7) | -1.75 (-2.32,-1.17) |
| Philippines | 207498 (162611,260809) | 663.4 (523.4,830.1) | 271264 (213902,342247) | 451.2 (356,566.6) | -32 (-35.3,-28.9) | -1.06 (-1.16,-0.96) |
| Poland | 37882 (26720,54634) | 214.1 (150.4,312.6) | 20288 (17966,23310) | 119.4 (105,135.7) | -44.2 (-61.5,-24.5) | -2.11 (-2.37,-1.86) |
| Portugal | 6149 (4524,8461) | 123 (90.2,169.3) | 5076 (4897,5245) | 115 (111,119.1) | -6.5 (-31.8,28.6) | -0.08 (-0.78,0.63) |
| Puerto Rico | 8826 (6818,11968) | 456.8 (352.8,619.5) | 3074 (2416,3985) | 218.2 (170.6,284.6) | -52.2 (-58.9,-45.5) | -2.44 (-2.71,-2.16) |
| Qatar | 828 (611,1096) | 478.6 (358.3,627.4) | 3744 (2777,4859) | 278 (210.4,357.4) | -41.9 (-51.4,-32.8) | -2.64 (-3.34,-1.94) |
| Republic of Korea | 10574 (8417,13269) | 37.8 (30.1,47.4) | 8181 (6573,9966) | 35 (28.2,42.4) | -7.3 (-24.4,13.9) | -1.52 (-2.25,-0.78) |
| Republic of Moldova | 8899 (6554,12470) | 401.4 (292.2,568) | 4370 (3283,5760) | 275.4 (205.6,370.5) | -31.4 (-41.9,-19.1) | -0.61 (-1.17,-0.06) |
| Romania | 28705 (20835,39308) | 257.3 (185.9,351.6) | 24009 (18156,32408) | 341.2 (256.4,468.2) | 32.6 (6.9,61.8) | 1.19 (0.6,1.79) |
| Russian Federation | 292273 (216841,395601) | 409.8 (299.3,561.1) | 290880 (223683,371886) | 463.1 (362.3,588.8) | 13 (-4.4,32.7) | 1.53 (1.05,2.01) |
| Rwanda | 75218 (63337,88265) | 2319.8 (1977.7,2697) | 82868 (69475,96057) | 1165.6 (982.9,1341.9) | -49.8 (-52.9,-45.7) | -2.62 (-2.81,-2.44) |
| Saint Kitts and Nevis | 104 (80,136) | 456.6 (354.7,588.4) | 70 (56,91) | 233.2 (185.2,304.1) | -48.9 (-54.5,-42.6) | -2.46 (-2.6,-2.33) |
| Saint Lucia | 364 (281,473) | 487.3 (377.8,619.3) | 206 (165,261) | 233.4 (186.8,297.2) | -52.1 (-57.8,-45.3) | -2.62 (-2.76,-2.47) |
| Saint Vincent and the Grenadines | 253 (193,331) | 427.6 (329.7,542.5) | 171 (134,218) | 314 (246.8,402.3) | -26.6 (-35.3,-16.4) | -0.84 (-0.99,-0.69) |
| Samoa | 371 (289,483) | 505.3 (391.8,652.9) | 594 (462,756) | 615.5 (476.3,787.1) | 21.8 (9.2,35.5) | 1.01 (0.88,1.14) |
| San Marino | 17 (13,23) | 133.2 (100.1,177.5) | 21 (15,27) | 156.2 (113.3,206.9) | 17.3 (-2.1,37.6) | 0.64 (0.58,0.71) |
| Sao Tome and Principe | 980 (816,1159) | 1898.4 (1603.9,2195.2) | 1027 (866,1205) | 900.7 (765,1047.3) | -52.6 (-56.2,-48.5) | -2.39 (-2.65,-2.14) |
| Saudi Arabia | 51114 (39359,66270) | 831.8 (647.1,1060.5) | 60375 (46279,77612) | 266.8 (204.8,340.7) | -67.9 (-72.7,-63) | -4.04 (-4.19,-3.88) |
| Senegal | 81811 (68187,97839) | 2362.8 (2004.5,2768.7) | 103303 (86984,120407) | 1308.6 (1102.3,1510) | -44.6 (-48.3,-40.2) | -1.68 (-1.78,-1.58) |
| Serbia | 5799 (4409,7913) | 127.1 (95.8,174.6) | 4367 (3215,5658) | 111.7 (82,145.3) | -12.1 (-28.8,8.9) | -0.74 (-1.37,-0.11) |
| Seychelles | 146 (111,188) | 373.5 (287.3,477) | 180 (140,229) | 382.2 (298.1,489.3) | 2.3 (-12,17.2) | 0.43 (0.22,0.65) |
| Sierra Leone | 42012 (34818,49833) | 1960.6 (1644.8,2299.8) | 62489 (51355,74768) | 1320 (1093.4,1555.3) | -32.7 (-37,-27.4) | -1.41 (-1.53,-1.29) |
| Singapore | 1942 (1448,2575) | 95.2 (71.5,125.8) | 2821 (2032,3809) | 86.9 (63.9,116.8) | -8.8 (-26.1,8.5) | -0.57 (-0.77,-0.37) |
| Slovakia | 4711 (3352,6610) | 186.8 (131.2,264.6) | 3995 (2929,5171) | 168 (123.5,217.9) | -10.1 (-28.3,15.1) | 0.6 (-0.11,1.32) |
| Slovenia | 1937 (1396,2644) | 196 (141.1,267.6) | 2156 (1593,2923) | 269.4 (197.5,367.1) | 37.5 (7.6,73) | 0.93 (0.59,1.27) |
| Solomon Islands | 1097 (855,1427) | 760.4 (588.6,962.2) | 1830 (1427,2372) | 529.5 (412.1,679.7) | -30.4 (-37.6,-21.7) | -1.33 (-1.47,-1.19) |
| Somalia | 86088 (71824,100975) | 2508.4 (2103.9,2944.3) | 182822 (149682,223148) | 1919.1 (1579,2310) | -23.5 (-29.3,-17.1) | -0.83 (-0.91,-0.74) |
| South Africa | 226685 (190225,268545) | 1088.1 (924.9,1269.3) | 239893 (204404,277376) | 754.1 (640.4,871.7) | -30.7 (-33.1,-28) | -1 (-1.07,-0.93) |
| South Sudan | 66865 (56343,78373) | 2498.5 (2134.8,2896.9) | 105919 (90219,123487) | 2337.9 (2015.4,2688.9) | -6.4 (-12.5,0) | -0.21 (-0.25,-0.17) |
| Spain | 43984 (32669,59058) | 226.2 (167.9,303.8) | 37842 (37267,38435) | 198.4 (195.3,201.4) | -12.3 (-34.8,18.3) | 0.34 (0.06,0.62) |
| Sri Lanka | 28835 (21575,37716) | 302.7 (226.7,392.7) | 32159 (24472,42415) | 289.3 (220.2,382.1) | -4.4 (-18.7,9.2) | 0.13 (-0.02,0.29) |
| Sudan | 69481 (54804,91155) | 730.4 (582.6,931.2) | 83015 (63984,106981) | 356.4 (273.9,461.2) | -51.2 (-58.3,-44.2) | -2.27 (-2.4,-2.15) |
| Suriname | 994 (761,1308) | 470.2 (362,617.8) | 986 (783,1247) | 343.3 (272.5,433.9) | -27 (-34.8,-18.8) | -0.85 (-0.97,-0.73) |
| Sweden | 5714 (4637,6905) | 146.1 (118.7,176.7) | 4787 (3589,6262) | 103.9 (78.4,137.4) | -28.9 (-42.7,-13.3) | -1.11 (-1.26,-0.95) |
| Switzerland | 5047 (3628,6819) | 138.4 (99.7,187.5) | 6115 (4495,8037) | 145.7 (108.3,191.1) | 5.3 (-14.2,29.9) | 1.59 (1.07,2.11) |
| Syrian Arab Republic | 35972 (27125,47261) | 656.6 (497.9,847) | 17715 (13679,22625) | 259.9 (196.7,338.3) | -60.4 (-65.3,-55.6) | -2.82 (-2.87,-2.76) |
| Taiwan (Province of China) | 10914 (8138,14782) | 89.1 (66.5,120.3) | 8503 (6121,11522) | 74.9 (55.1,101.1) | -16 (-34.4,6.9) | -0.39 (-1.31,0.54) |
| Tajikistan | 5538 (4325,7057) | 231.2 (180.7,298) | 7221 (5684,9220) | 133.9 (106.2,171.2) | -42.1 (-50,-32) | -1.59 (-1.69,-1.48) |
| Thailand | 82475 (62981,104846) | 243.1 (187.4,309.5) | 62595 (49393,80319) | 209.4 (166.1,270.6) | -13.9 (-25.6,-0.8) | -0.25 (-0.36,-0.13) |
| Timor-Leste | 3258 (2525,4126) | 859.6 (673.7,1090.3) | 3355 (2567,4262) | 504.6 (388.3,638.4) | -41.3 (-48.3,-33.6) | -1.89 (-2.09,-1.7) |
| Togo | 35156 (29396,41911) | 2044.9 (1729.2,2390.7) | 54528 (45757,63799) | 1243.6 (1046.5,1444.8) | -39.2 (-43.4,-34.7) | -1 (-1.31,-0.69) |
| Tokelau | 3 (2,4) | 452.7 (340.4,576.4) | 3 (2,3) | 436.3 (332,561.3) | -3.6 (-15.3,9.2) | -0.09 (-0.13,-0.05) |
| Tonga | 414 (322,538) | 982.1 (754.8,1265.4) | 361 (279,470) | 733.3 (567.3,956.1) | -25.3 (-34.6,-16) | -1.16 (-1.27,-1.04) |
| Trinidad and Tobago | 3010 (2374,4033) | 457.3 (362.9,610.5) | 2211 (1771,2831) | 333.5 (265.8,428.9) | -27.1 (-36.2,-16.3) | -0.43 (-0.69,-0.17) |
| Tunisia | 17693 (13375,23438) | 428.3 (319.1,561.1) | 12897 (9514,17106) | 196.7 (144.6,258) | -54.1 (-60.1,-47.6) | -2.2 (-2.35,-2.06) |
| T眉rkiye | 145375 (114034,186273) | 473 (373.8,604.8) | 117163 (89032,152543) | 270.1 (204.9,353.6) | -42.9 (-54.6,-28.2) | -0.64 (-1.19,-0.09) |
| Turkmenistan | 4490 (3464,5812) | 249.9 (193.6,326.7) | 5222 (4005,6870) | 203.1 (156.1,266.5) | -18.7 (-31.7,-2.3) | -0.35 (-0.67,-0.03) |
| Tuvalu | 34 (26,45) | 683.8 (518.6,888) | 31 (24,40) | 530.9 (409.4,674.9) | -22.4 (-33,-11.1) | -0.88 (-0.95,-0.8) |
| Uganda | 184932 (150047,222608) | 2307.6 (1921.8,2709.9) | 317352 (258945,380619) | 1468.2 (1221.8,1725.1) | -36.4 (-40.8,-31.1) | -1.36 (-1.52,-1.2) |
| Ukraine | 98847 (71738,135818) | 414.9 (298.8,570.6) | 55424 (42442,72806) | 310.2 (235.1,409.3) | -25.2 (-36.6,-9.5) | -0.05 (-0.51,0.41) |
| United Arab Emirates | 2523 (2209,2916) | 367.1 (325.3,418.3) | 9358 (7097,12047) | 237.5 (183.4,303.5) | -35.3 (-47.6,-20.8) | -0.81 (-1.11,-0.52) |
| United Kingdom | 63881 (50414,81594) | 223 (176.9,283.7) | 70101 (52592,90650) | 222.1 (167.5,285.7) | -0.4 (-12,12.3) | 0.51 (0.31,0.72) |
| United Republic of Tanzania | 252629 (207606,300207) | 2063.9 (1720.7,2402) | 437289 (366379,517342) | 1436.9 (1210.4,1664.7) | -30.4 (-35.1,-25.8) | -0.85 (-1.22,-0.48) |
| United States of America | 564010 (429580,745805) | 422.4 (322.2,565.4) | 619713 (534305,728017) | 406.3 (349.9,476) | -3.8 (-24.9,19.3) | -0.43 (-0.67,-0.2) |
| United States Virgin Islands | 320 (251,425) | 588.2 (459.2,787.5) | 127 (101,161) | 398.2 (315.3,511.5) | -32.3 (-40.5,-22.1) | -1.42 (-1.61,-1.22) |
| Uruguay | 5627 (4297,7555) | 372.8 (284.8,500.3) | 6026 (4595,7920) | 369.6 (282,487.7) | -0.9 (-15.1,11.1) | -0.17 (-0.32,-0.03) |
| Uzbekistan | 22410 (17367,29118) | 215.2 (165.1,276.5) | 29216 (22520,37890) | 157.7 (122.3,202.9) | -26.7 (-38.2,-9.5) | -0.86 (-1.05,-0.67) |
| Vanuatu | 529 (412,672) | 730.7 (568,930.2) | 840 (648,1090) | 518.9 (403.1,675) | -29 (-37.6,-20.7) | -1.19 (-1.33,-1.05) |
| Venezuela (Bolivarian Republic of) | 43262 (36076,52856) | 417.5 (349.8,504.7) | 40550 (34553,49399) | 308.7 (262,375.7) | -26.1 (-33.5,-17.1) | -0.77 (-0.93,-0.61) |
| Viet Nam | 141258 (110517,183917) | 383.3 (303.3,490.5) | 108603 (81511,142506) | 208.2 (159.3,271.3) | -45.7 (-52.9,-38.6) | -1.83 (-1.99,-1.67) |
| Yemen | 96023 (75986,125860) | 1721.5 (1370.7,2205.3) | 127515 (99262,168475) | 749.8 (582,984.4) | -56.4 (-61.4,-51) | -2.69 (-2.82,-2.57) |
| Zambia | 92038 (76244,108784) | 2445 (2081.9,2836.3) | 155971 (133787,179546) | 1510.8 (1313.5,1723.5) | -38.2 (-41.7,-33.9) | -1.42 (-1.6,-1.23) |
| Zimbabwe | 77894 (62077,96445) | 1550.2 (1265.1,1881.7) | 88922 (70205,110275) | 1040.6 (827,1278.2) | -32.9 (-39.2,-26.4) | -1.07 (-1.13,-1) |

MHD: maternal hypertensive disorder; ASR: age-standardized rate; ASIR: age-standardized incidence rate; EAPC: estimated annual percentage change.

**Table S4.** The deaths cases and ASMR of MHD in 1990 and 2021, along with the percentage change in the ASR per 100,000 population and the EAPC by location.

| Location | 1990 | | 2021 | | Percentage change in the ASR per 100,000 | EAPC (95% CI) |
| --- | --- | --- | --- | --- | --- | --- |
| No (95% UI) | ASR per 100,000 (95% UI) | No (95% UI) | ASR per 100,000 (95% UI) |
| Afghanistan | 411 (262,597) | 10.1 (6.5,14.7) | 536 (323,834) | 3.8 (2.2,5.9) | -62.5 (-77.7,-35.8) | -2.74 (-2.87,-2.62) |
| Albania | 2 (1,2) | 0.1 (0.1,0.1) | 0 (0,0) | 0 (0,0) | -84.8 (-91.9,-71.2) | -5.43 (-5.68,-5.18) |
| Algeria | 272 (178,382) | 2.3 (1.5,3.3) | 64 (38,95) | 0.3 (0.2,0.4) | -88.2 (-93,-78.7) | -6.16 (-6.46,-5.86) |
| American Samoa | 0 (0,0) | 0.8 (0.5,1.3) | 0 (0,0) | 0.7 (0.4,1.1) | -13.5 (-56.2,71.6) | 0.81 (0.36,1.27) |
| Andorra | 0 (0,0) | 0 (0,0) | 0 (0,0) | 0 (0,0) | -73.3 (-88.7,-39.3) | -3.63 (-3.87,-3.38) |
| Angola | 491 (305,751) | 10.5 (6.4,16.2) | 557 (324,918) | 3.8 (2.2,6.4) | -63.4 (-82.1,-25.7) | -3.6 (-3.86,-3.33) |
| Antigua and Barbuda | 0 (0,0) | 0.3 (0.2,0.3) | 0 (0,0) | 0.1 (0.1,0.2) | -50.1 (-61.8,-35.9) | -1.43 (-2,-0.87) |
| Argentina | 79 (62,99) | 0.5 (0.4,0.6) | 30 (22,39) | 0.1 (0.1,0.2) | -73.7 (-81.6,-62.5) | -3.31 (-3.68,-2.93) |
| Armenia | 5 (4,6) | 0.2 (0.2,0.3) | 0 (0,0) | 0 (0,0) | -90.7 (-93.6,-87) | -6.91 (-7.65,-6.18) |
| Australia | 4 (3,5) | 0 (0,0.1) | 1 (1,2) | 0 (0,0) | -75.5 (-83.4,-65.8) | -3.96 (-4.6,-3.32) |
| Austria | 1 (1,1) | 0 (0,0) | 0 (0,0) | 0 (0,0) | -74.1 (-79.7,-64.9) | -3.2 (-3.68,-2.73) |
| Azerbaijan | 17 (13,21) | 0.4 (0.3,0.5) | 3 (2,4) | 0 (0,0.1) | -88.3 (-93,-81.3) | -6.85 (-7.32,-6.38) |
| Bahamas | 1 (1,1) | 0.6 (0.5,0.7) | 1 (0,1) | 0.2 (0.2,0.3) | -57.8 (-71.8,-37.2) | -2.29 (-2.88,-1.7) |
| Bahrain | 1 (1,2) | 0.6 (0.4,0.8) | 1 (0,1) | 0.1 (0,0.1) | -87.3 (-93.2,-76.7) | -6.37 (-6.74,-6) |
| Bangladesh | 4456 (3650,5385) | 8 (6.4,9.5) | 737 (482,1048) | 0.8 (0.5,1.1) | -90.2 (-93.9,-85.4) | -7.99 (-8.4,-7.58) |
| Barbados | 0 (0,1) | 0.3 (0.3,0.4) | 0 (0,0) | 0.1 (0.1,0.2) | -59 (-70.9,-41.5) | -2.26 (-2.72,-1.8) |
| Belarus | 6 (5,7) | 0.1 (0.1,0.1) | 1 (1,1) | 0 (0,0) | -82.1 (-87.6,-74.3) | -4.74 (-5.25,-4.22) |
| Belgium | 1 (1,2) | 0 (0,0) | 0 (0,1) | 0 (0,0) | -70.4 (-77.3,-60.7) | -3.78 (-4.24,-3.32) |
| Belize | 1 (0,1) | 0.6 (0.5,0.7) | 1 (1,1) | 0.4 (0.3,0.5) | -27.2 (-46,-1.6) | -0.15 (-0.59,0.31) |
| Benin | 186 (132,248) | 8.2 (5.9,11) | 175 (100,256) | 2.6 (1.5,3.7) | -68.8 (-82.8,-48.3) | -2.96 (-3.37,-2.55) |
| Bermuda | 0 (0,0) | 0.2 (0.1,0.2) | 0 (0,0) | 0 (0,0) | -92.4 (-94.9,-89.1) | -7.54 (-8.74,-6.33) |
| Bhutan | 22 (14,33) | 6.9 (4.2,10.2) | 3 (2,5) | 0.7 (0.4,1.3) | -89.3 (-94.8,-79) | -7.37 (-7.55,-7.19) |
| Bolivia (Plurinational State of) | 199 (148,257) | 6.5 (4.8,8.4) | 138 (96,199) | 2.2 (1.5,3.2) | -66.1 (-78.2,-46.2) | -3.79 (-3.93,-3.65) |
| Bosnia and Herzegovina | 1 (1,1) | 0 (0,0.1) | 0 (0,0) | 0 (0,0) | -65.1 (-81.5,-41.1) | -4.69 (-5.33,-4.04) |
| Botswana | 7 (4,11) | 1 (0.6,1.5) | 5 (3,7) | 0.3 (0.2,0.5) | -66 (-82.3,-30.6) | -2.76 (-3.32,-2.2) |
| Brazil | 1198 (1067,1345) | 1.5 (1.3,1.7) | 325 (279,371) | 0.3 (0.2,0.3) | -81.5 (-84.3,-78.3) | -4.51 (-4.97,-4.04) |
| Brunei Darussalam | 1 (0,1) | 0.6 (0.3,1) | 0 (0,0) | 0.1 (0.1,0.2) | -83.9 (-92.2,-67.6) | -4.99 (-5.46,-4.51) |
| Bulgaria | 5 (4,6) | 0.1 (0.1,0.1) | 1 (1,1) | 0 (0,0) | -71.8 (-80.2,-61) | -3.5 (-3.9,-3.1) |
| Burkina Faso | 237 (166,320) | 5.6 (3.9,7.7) | 329 (220,479) | 2.9 (1.9,4.2) | -48.7 (-70.8,-15) | -2.07 (-2.23,-1.92) |
| Burundi | 237 (148,332) | 9.4 (5.9,13.4) | 220 (132,326) | 3.7 (2.2,5.4) | -61.3 (-78.7,-27.8) | -3.62 (-3.99,-3.26) |
| Cabo Verde | 2 (1,3) | 1.3 (0.8,2) | 1 (0,1) | 0.2 (0.1,0.3) | -84.4 (-92.7,-70.2) | -5.69 (-6.26,-5.11) |
| Cambodia | 253 (180,349) | 5 (3.5,6.9) | 85 (52,137) | 0.9 (0.6,1.5) | -81.9 (-89.7,-67.2) | -6.23 (-6.59,-5.87) |
| Cameroon | 294 (205,404) | 5.5 (3.9,7.6) | 387 (235,552) | 2.3 (1.4,3.3) | -58.7 (-76,-31.8) | -2.03 (-2.56,-1.49) |
| Canada | 3 (2,4) | 0 (0,0) | 3 (2,4) | 0 (0,0) | 6 (-25.3,45.1) | 0.13 (-0.23,0.5) |
| Central African Republic | 156 (108,203) | 12.2 (8.4,15.9) | 185 (112,284) | 6.8 (4.1,10.5) | -44.3 (-65.8,-3.6) | -1.52 (-1.91,-1.13) |
| Chad | 220 (158,283) | 7.7 (5.5,10) | 582 (376,838) | 6.9 (4.4,10) | -10.9 (-45.9,39.2) | -0.13 (-0.34,0.08) |
| Chile | 32 (27,37) | 0.4 (0.4,0.5) | 5 (4,7) | 0.1 (0,0.1) | -87.1 (-90.1,-82.8) | -5.78 (-6.23,-5.32) |
| China | 1668 (1154,2246) | 0.2 (0.2,0.3) | 173 (124,241) | 0 (0,0) | -88.7 (-92.3,-81.5) | -6.55 (-6.84,-6.26) |
| Colombia | 256 (201,314) | 1.4 (1.1,1.7) | 59 (41,79) | 0.2 (0.2,0.3) | -84.2 (-89.7,-77.2) | -5.65 (-6.18,-5.12) |
| Comoros | 10 (5,16) | 5.4 (2.7,8.2) | 7 (4,11) | 1.9 (1.1,3) | -65.6 (-83.1,-23.9) | -4.09 (-4.58,-3.6) |
| Congo | 97 (60,140) | 8.8 (5.3,12.8) | 106 (61,171) | 3.7 (2.1,6) | -57.8 (-78.3,-23.7) | -2.63 (-3.31,-1.95) |
| Cook Islands | 0 (0,0) | 0 (0,0) | 0 (0,0) | 0 (0,0) | -75.1 (-89.4,-39.8) | -3.18 (-3.93,-2.42) |
| Costa Rica | 4 (3,5) | 0.2 (0.2,0.3) | 2 (1,2) | 0.1 (0,0.1) | -75.6 (-81.6,-67.5) | -5.03 (-5.56,-4.49) |
| C么te d'Ivoire | 343 (229,500) | 6.2 (4.2,9) | 527 (313,852) | 3.9 (2.3,6.3) | -37.5 (-66.5,21) | -1.09 (-1.39,-0.78) |
| Croatia | 2 (1,2) | 0.1 (0.1,0.1) | 0 (0,0) | 0 (0,0) | -89 (-92.1,-85.4) | -6.24 (-6.76,-5.7) |
| Cuba | 14 (12,17) | 0.2 (0.2,0.3) | 3 (2,4) | 0.1 (0,0.1) | -72.5 (-79.5,-63.4) | -3.46 (-4.14,-2.79) |
| Cyprus | 0 (0,1) | 0.1 (0,0.1) | 0 (0,0) | 0 (0,0) | -86.7 (-93.7,-72) | -7.28 (-7.68,-6.87) |
| Czechia | 2 (2,3) | 0 (0,0.1) | 0 (0,0) | 0 (0,0) | -85.3 (-89.4,-80) | -4.76 (-5.67,-3.84) |
| Democratic People's Republic of Korea | 146 (77,242) | 1.3 (0.7,2.2) | 20 (11,36) | 0.2 (0.1,0.3) | -88.5 (-94.6,-75.5) | -6.69 (-6.79,-6.58) |
| Democratic Republic of the Congo | 1674 (1080,2391) | 10.2 (6.7,14) | 1797 (1155,2540) | 4.2 (2.8,6) | -58.3 (-75.3,-28.9) | -1.54 (-2.01,-1.06) |
| Denmark | 1 (1,2) | 0.1 (0,0.1) | 0 (0,0) | 0 (0,0) | -76 (-83.5,-64.5) | -5.21 (-5.76,-4.67) |
| Djibouti | 19 (12,28) | 8.9 (5.7,13.2) | 32 (17,53) | 4.8 (2.6,8.1) | -46.1 (-72.4,-6.1) | -1.92 (-2.27,-1.57) |
| Dominica | 0 (0,0) | 0.1 (0,0.1) | 0 (0,0) | 0.1 (0,0.1) | -1.7 (-46.8,69.9) | 0.46 (-0.21,1.13) |
| Dominican Republic | 79 (62,97) | 1.9 (1.5,2.4) | 38 (27,51) | 0.6 (0.5,0.9) | -67.1 (-77.2,-51.2) | -2.74 (-3.12,-2.36) |
| Ecuador | 144 (124,168) | 2.8 (2.4,3.3) | 62 (45,83) | 0.6 (0.5,0.9) | -77.2 (-83.9,-68.9) | -4.37 (-4.75,-3.98) |
| Egypt | 489 (337,663) | 1.8 (1.2,2.5) | 182 (116,259) | 0.3 (0.2,0.5) | -81.1 (-88.8,-69.1) | -4.33 (-4.88,-3.78) |
| El Salvador | 72 (54,90) | 2.6 (2,3.2) | 5 (4,8) | 0.2 (0.1,0.2) | -94.2 (-96.3,-91.5) | -7.94 (-9.52,-6.33) |
| Equatorial Guinea | 22 (12,34) | 11.1 (6.1,17.3) | 22 (10,40) | 3.1 (1.4,5.6) | -71.8 (-87.8,-43) | -3.77 (-4.08,-3.47) |
| Eritrea | 166 (120,211) | 9.9 (7.1,12.6) | 130 (71,208) | 3.7 (2,6) | -62.4 (-80.3,-34.8) | -2.58 (-2.81,-2.34) |
| Estonia | 1 (1,1) | 0.1 (0.1,0.1) | 0 (0,0) | 0 (0,0) | -94.1 (-95.7,-91.7) | -8.73 (-9.06,-8.4) |
| Eswatini | 5 (3,8) | 1.4 (0.8,2.2) | 5 (2,9) | 0.8 (0.3,1.5) | -43.1 (-74.5,20.4) | -0.97 (-1.62,-0.32) |
| Ethiopia | 2822 (2254,3379) | 12.7 (10,15.2) | 1153 (766,1568) | 2.2 (1.5,3) | -82.8 (-89.1,-74.9) | -6.38 (-6.79,-5.97) |
| Fiji | 3 (2,5) | 0.8 (0.5,1.3) | 3 (1,4) | 0.6 (0.3,1) | -27.8 (-65.8,50.9) | -1.43 (-1.69,-1.17) |
| Finland | 1 (0,1) | 0 (0,0) | 0 (0,0) | 0 (0,0) | -62.4 (-74.3,-47.1) | -2.56 (-2.85,-2.27) |
| France | 16 (13,20) | 0.1 (0,0.1) | 3 (2,4) | 0 (0,0) | -78.4 (-85.1,-70.3) | -5.13 (-5.53,-4.74) |
| Gabon | 23 (16,32) | 5.2 (3.6,7.1) | 13 (7,23) | 1.3 (0.7,2.3) | -74 (-87.2,-51.6) | -4.38 (-5,-3.76) |
| Gambia | 30 (18,44) | 6.3 (3.8,9.2) | 52 (31,82) | 4.3 (2.5,6.7) | -31.8 (-64.2,19.9) | -1.16 (-1.54,-0.77) |
| Georgia | 10 (8,12) | 0.3 (0.3,0.4) | 1 (1,1) | 0 (0,0.1) | -85.9 (-89.9,-81.1) | -5.3 (-6,-4.59) |
| Germany | 20 (17,24) | 0 (0,0.1) | 4 (3,5) | 0 (0,0) | -76.7 (-81.5,-70.7) | -3.94 (-4.25,-3.63) |
| Ghana | 221 (133,325) | 2.9 (1.8,4.3) | 264 (180,376) | 1.4 (0.9,1.9) | -53.5 (-73.6,-14.6) | -1.7 (-1.93,-1.47) |
| Greece | 1 (1,1) | 0 (0,0) | 1 (0,1) | 0 (0,0) | -43.8 (-57.4,-26) | -1.24 (-1.58,-0.91) |
| Greenland | 0 (0,0) | 0.1 (0,0.1) | 0 (0,0) | 0 (0,0) | -71.5 (-85.9,-46.1) | -3.47 (-3.87,-3.06) |
| Grenada | 0 (0,1) | 1.1 (0.9,1.3) | 0 (0,1) | 0.8 (0.6,1.1) | -22.9 (-43.7,6.6) | -0.02 (-0.73,0.69) |
| Guam | 0 (0,0) | 0.1 (0.1,0.2) | 0 (0,0) | 0.2 (0.1,0.3) | 42.5 (-24.5,152) | 2.75 (2.1,3.39) |
| Guatemala | 145 (122,171) | 3.8 (3.2,4.5) | 121 (91,155) | 1.4 (1,1.8) | -63.7 (-73.9,-50.9) | -3.39 (-4.21,-2.56) |
| Guinea | 318 (230,419) | 11.1 (8,14.6) | 393 (242,594) | 5.8 (3.6,8.7) | -47.9 (-68.9,-8.3) | -1.55 (-1.74,-1.36) |
| Guinea-Bissau | 36 (23,53) | 7.2 (4.5,10.5) | 31 (18,52) | 2.8 (1.6,4.7) | -60.7 (-80.1,-31.2) | -2.95 (-3.23,-2.66) |
| Guyana | 5 (4,7) | 1.2 (0.8,1.5) | 3 (2,5) | 0.8 (0.5,1.1) | -33.7 (-58.7,3.4) | -0.93 (-1.22,-0.64) |
| Haiti | 247 (177,340) | 8.2 (5.8,11.4) | 434 (262,657) | 6 (3.6,9.2) | -26.5 (-55.3,13.1) | -0.3 (-0.59,0) |
| Honduras | 93 (70,118) | 4.3 (3.2,5.4) | 60 (29,107) | 1 (0.5,1.9) | -75.6 (-88.5,-51.9) | -4.56 (-4.79,-4.34) |
| Hungary | 4 (3,4) | 0.1 (0.1,0.1) | 1 (0,1) | 0 (0,0) | -78.9 (-84.8,-71.9) | -3.69 (-4.87,-2.49) |
| Iceland | 0 (0,0) | 0.1 (0,0.1) | 0 (0,0) | 0 (0,0) | -70.2 (-77.2,-60.3) | -3.33 (-3.66,-2.99) |
| India | 11406 (9654,13346) | 2.7 (2.3,3.1) | 5630 (4521,6890) | 0.7 (0.6,0.9) | -72.8 (-79.3,-63.4) | -4.48 (-4.83,-4.13) |
| Indonesia | 4823 (3900,5819) | 4.9 (3.9,5.9) | 2022 (1537,2777) | 1.3 (1,1.8) | -72.6 (-80.7,-60.1) | -4.01 (-4.17,-3.85) |
| Iran (Islamic Republic of) | 170 (118,228) | 0.7 (0.5,0.9) | 13 (9,18) | 0 (0,0) | -96.2 (-97.6,-93.9) | -9.15 (-9.51,-8.78) |
| Iraq | 70 (41,110) | 0.9 (0.5,1.4) | 29 (16,49) | 0.1 (0.1,0.2) | -84.8 (-92.6,-70) | -5.48 (-5.95,-5.01) |
| Ireland | 1 (1,1) | 0 (0,0.1) | 0 (0,0) | 0 (0,0) | -73.6 (-80,-63.4) | -3.21 (-4.03,-2.38) |
| Israel | 1 (1,1) | 0 (0,0.1) | 0 (0,1) | 0 (0,0) | -75.8 (-82.7,-66.3) | -3.65 (-4.15,-3.15) |
| Italy | 10 (9,13) | 0 (0,0) | 2 (2,2) | 0 (0,0) | -74.5 (-80.5,-67.6) | -2.93 (-3.63,-2.22) |
| Jamaica | 7 (6,9) | 0.6 (0.5,0.7) | 6 (4,9) | 0.4 (0.2,0.6) | -34.5 (-55.9,2.7) | -3.3 (-4.03,-2.57) |
| Japan | 19 (16,23) | 0 (0,0) | 4 (3,5) | 0 (0,0) | -73.8 (-80,-64.7) | -4.28 (-4.65,-3.9) |
| Jordan | 38 (26,51) | 2.6 (1.8,3.6) | 5 (3,8) | 0.1 (0,0.1) | -96.8 (-98.3,-94) | -11.32 (-11.65,-10.99) |
| Kazakhstan | 43 (35,52) | 0.5 (0.4,0.6) | 8 (7,11) | 0.1 (0.1,0.1) | -81.9 (-86.3,-76) | -5.76 (-6.32,-5.19) |
| Kenya | 487 (350,635) | 5.1 (3.7,6.8) | 530 (340,768) | 2.1 (1.4,3) | -59.2 (-77,-32.4) | -2.03 (-2.49,-1.55) |
| Kiribati | 1 (0,1) | 1.3 (0.9,2) | 0 (0,1) | 0.6 (0.4,1.1) | -51.7 (-77.2,-11.6) | -2.42 (-2.68,-2.17) |
| Kuwait | 0 (0,1) | 0.1 (0,0.1) | 0 (0,0) | 0 (0,0) | -82.7 (-87.9,-75.5) | -6.22 (-7.78,-4.64) |
| Kyrgyzstan | 36 (31,42) | 1.6 (1.4,1.9) | 10 (8,13) | 0.3 (0.2,0.4) | -82.7 (-86.8,-77.7) | -4.57 (-5.17,-3.96) |
| Lao People's Democratic Republic | 101 (68,145) | 5.2 (3.5,7.5) | 26 (12,47) | 0.6 (0.3,1.2) | -87.7 (-94.2,-75.5) | -6.93 (-7.1,-6.75) |
| Latvia | 1 (1,1) | 0.1 (0.1,0.1) | 0 (0,0) | 0 (0,0) | -91.8 (-94,-88.5) | -7.39 (-7.88,-6.91) |
| Lebanon | 6 (3,10) | 0.4 (0.2,0.6) | 1 (1,2) | 0 (0,0.1) | -91.3 (-96.1,-81.6) | -7.37 (-7.55,-7.2) |
| Lesotho | 17 (11,24) | 2.2 (1.4,3.1) | 19 (11,31) | 1.9 (1.1,3) | -14.4 (-55.9,60) | 0.48 (-0.19,1.17) |
| Liberia | 143 (98,199) | 12.7 (8.6,17.7) | 54 (33,84) | 1.8 (1.1,2.7) | -86 (-92.2,-77.5) | -5.98 (-6.21,-5.75) |
| Libya | 19 (11,29) | 1.2 (0.7,1.9) | 8 (4,13) | 0.2 (0.1,0.3) | -85.1 (-93.2,-70.4) | -5.4 (-5.82,-4.97) |
| Lithuania | 2 (2,2) | 0.1 (0.1,0.1) | 0 (0,0) | 0 (0,0) | -91 (-93.3,-87.8) | -6.59 (-7.11,-6.08) |
| Luxembourg | 0 (0,0) | 0.1 (0,0.1) | 0 (0,0) | 0 (0,0) | -74.6 (-82.2,-65.7) | -4.66 (-5.13,-4.19) |
| Madagascar | 323 (228,436) | 5.8 (4.1,7.9) | 505 (338,708) | 3.5 (2.3,5) | -39.8 (-63.1,-4.3) | -1.55 (-1.91,-1.18) |
| Malawi | 378 (282,504) | 9.4 (7,12.4) | 281 (176,433) | 3.2 (2,4.8) | -66.1 (-80.1,-45.2) | -3.26 (-3.62,-2.9) |
| Malaysia | 55 (35,80) | 0.6 (0.4,0.9) | 27 (20,37) | 0.2 (0.1,0.2) | -73.6 (-84.4,-54.4) | -4.31 (-4.76,-3.86) |
| Maldives | 2 (1,2) | 1.8 (1.3,2.4) | 0 (0,0) | 0.1 (0.1,0.1) | -95.4 (-97.4,-92.2) | -9.62 (-10.09,-9.15) |
| Mali | 258 (214,304) | 6.3 (5.2,7.4) | 349 (249,487) | 2.9 (2.1,4.1) | -53.5 (-68.1,-34.7) | -2.25 (-2.46,-2.05) |
| Malta | 0 (0,0) | 0.1 (0.1,0.1) | 0 (0,0) | 0 (0,0) | -69.1 (-77.2,-59) | -2.2 (-2.74,-1.67) |
| Marshall Islands | 0 (0,0) | 0.6 (0.3,1.2) | 0 (0,0) | 0.4 (0.2,0.8) | -32.1 (-68.9,33.6) | -1.33 (-1.86,-0.81) |
| Mauritania | 153 (117,193) | 16.1 (12.2,20.5) | 63 (33,105) | 3 (1.6,5) | -81.6 (-90.4,-68) | -5.21 (-5.33,-5.08) |
| Mauritius | 3 (2,3) | 0.4 (0.3,0.5) | 1 (1,1) | 0.1 (0.1,0.2) | -65.2 (-73.1,-55.1) | -4.04 (-4.35,-3.73) |
| Mexico | 423 (361,501) | 0.9 (0.8,1.1) | 145 (109,186) | 0.2 (0.2,0.3) | -77.8 (-83.9,-70.3) | -4.83 (-5.07,-4.59) |
| Micronesia (Federated States of) | 0 (0,1) | 1.1 (0.6,1.7) | 0 (0,0) | 0.2 (0.1,0.4) | -78.6 (-89.5,-59.5) | -4.26 (-4.8,-3.72) |
| Monaco | 0 (0,0) | 0 (0,0.1) | 0 (0,0) | 0 (0,0) | -41.3 (-75.4,26.6) | -1.41 (-1.58,-1.23) |
| Mongolia | 12 (8,17) | 1.1 (0.8,1.6) | 3 (2,4) | 0.2 (0.1,0.2) | -85.4 (-91.4,-75.7) | -6.86 (-7.3,-6.42) |
| Montenegro | 0 (0,0) | 0 (0,0) | 0 (0,0) | 0 (0,0) | -66.1 (-84.9,-32.9) | -3.17 (-3.85,-2.49) |
| Morocco | 659 (496,869) | 5.5 (4.1,7.3) | 102 (56,171) | 0.5 (0.3,0.9) | -90.5 (-95,-83) | -7.44 (-7.79,-7.08) |
| Mozambique | 401 (291,549) | 6.4 (4.6,8.9) | 444 (269,692) | 3.1 (1.8,5) | -51.4 (-74,-14) | -1.39 (-1.69,-1.09) |
| Myanmar | 400 (286,555) | 1.7 (1.3,2.4) | 331 (221,466) | 1.1 (0.7,1.5) | -37.4 (-61.8,-3.4) | -1.29 (-1.41,-1.16) |
| Namibia | 19 (13,27) | 2.9 (2,4.1) | 10 (5,20) | 0.8 (0.4,1.5) | -73.5 (-86.4,-40.3) | -4.2 (-4.77,-3.62) |
| Nauru | 0 (0,0) | 2.2 (1.2,3.8) | 0 (0,0) | 1.6 (0.9,2.8) | -25.9 (-65.9,45.4) | -0.64 (-1.08,-0.19) |
| Nepal | 563 (352,812) | 6 (3.7,8.7) | 133 (72,229) | 0.7 (0.4,1.2) | -88.3 (-93.9,-75.9) | -6.64 (-6.89,-6.4) |
| Netherlands | 6 (5,7) | 0.1 (0.1,0.1) | 1 (1,2) | 0 (0,0) | -76.2 (-81.9,-68.7) | -4.78 (-5.11,-4.44) |
| New Zealand | 1 (1,1) | 0 (0,0) | 0 (0,0) | 0 (0,0) | -76.7 (-82.2,-67.9) | -3.32 (-4.44,-2.18) |
| Nicaragua | 21 (16,26) | 1.1 (0.9,1.4) | 10 (7,12) | 0.3 (0.2,0.3) | -77.2 (-83.7,-66.8) | -4.9 (-5.13,-4.67) |
| Niger | 284 (213,382) | 7.9 (5.9,10.5) | 542 (332,811) | 5 (3.1,7.5) | -36.4 (-62.1,1.1) | -1.6 (-1.75,-1.46) |
| Nigeria | 2929 (1905,4152) | 6.5 (4.2,9.1) | 5527 (3542,8442) | 4.8 (3.1,7.3) | -25.2 (-57,27.1) | -1.1 (-1.23,-0.98) |
| Niue | 0 (0,0) | 0.4 (0.2,0.8) | 0 (0,0) | 0.3 (0.2,0.4) | -36 (-72.2,45.6) | -2.95 (-3.45,-2.43) |
| North Macedonia | 1 (1,2) | 0.1 (0.1,0.2) | 0 (0,0) | 0 (0,0) | -82.6 (-91,-69.4) | -4.93 (-5.37,-4.49) |
| Northern Mariana Islands | 0 (0,0) | 0.3 (0.2,0.5) | 0 (0,0) | 0.2 (0.1,0.3) | -35.7 (-69.2,36.2) | -0.13 (-0.6,0.34) |
| Norway | 1 (1,2) | 0.1 (0.1,0.1) | 0 (0,0) | 0 (0,0) | -88.1 (-91.1,-84.4) | -7.31 (-8.84,-5.75) |
| Oman | 8 (4,14) | 1.1 (0.5,2) | 3 (1,4) | 0.1 (0.1,0.2) | -89 (-95.2,-72.7) | -6.35 (-6.86,-5.84) |
| Pakistan | 3953 (2512,5599) | 8.3 (5.2,11.7) | 5464 (3006,8792) | 4.4 (2.4,7.1) | -46.6 (-74.9,1) | -2.16 (-2.34,-1.97) |
| Palau | 0 (0,0) | 0.5 (0.2,0.7) | 0 (0,0) | 0.3 (0.2,0.5) | -34.2 (-70.1,26.3) | -0.5 (-0.92,-0.07) |
| Palestine | 4 (2,6) | 0.4 (0.2,0.7) | 2 (1,3) | 0.1 (0,0.1) | -85.1 (-92.8,-67.6) | -5.07 (-6.08,-4.05) |
| Panama | 8 (7,10) | 0.7 (0.5,0.8) | 5 (4,7) | 0.2 (0.2,0.3) | -62 (-72.8,-49.2) | -2.62 (-3.1,-2.13) |
| Papua New Guinea | 31 (15,48) | 1.6 (0.8,2.4) | 63 (41,90) | 1.2 (0.8,1.7) | -25.2 (-58.2,58.3) | -0.75 (-1,-0.5) |
| Paraguay | 27 (21,35) | 1.4 (1.1,1.8) | 20 (13,29) | 0.5 (0.3,0.7) | -63.6 (-77.2,-43.6) | -3.14 (-3.4,-2.88) |
| Peru | 299 (228,383) | 2.7 (2,3.4) | 137 (86,207) | 0.7 (0.4,1.1) | -73.6 (-84.5,-56) | -4.89 (-5.43,-4.35) |
| Philippines | 556 (408,717) | 1.8 (1.3,2.3) | 532 (394,736) | 0.9 (0.7,1.2) | -49.7 (-68,-21.5) | -1.59 (-1.77,-1.4) |
| Poland | 10 (8,12) | 0.1 (0,0.1) | 1 (1,1) | 0 (0,0) | -92.1 (-94.2,-89.3) | -7.11 (-7.79,-6.42) |
| Portugal | 3 (2,3) | 0.1 (0,0.1) | 1 (1,1) | 0 (0,0) | -66.8 (-75.4,-57.8) | -3.15 (-3.57,-2.73) |
| Puerto Rico | 6 (5,7) | 0.3 (0.3,0.4) | 1 (1,2) | 0.1 (0.1,0.1) | -71 (-79.3,-60.5) | -4.15 (-4.9,-3.4) |
| Qatar | 0 (0,1) | 0.2 (0.1,0.4) | 0 (0,0) | 0 (0,0) | -95.5 (-98,-90.3) | -9.92 (-10.28,-9.55) |
| Republic of Korea | 32 (25,40) | 0.1 (0.1,0.1) | 3 (2,4) | 0 (0,0) | -89.8 (-93.4,-83.9) | -6.9 (-7.23,-6.57) |
| Republic of Moldova | 4 (4,5) | 0.2 (0.2,0.2) | 0 (0,0) | 0 (0,0) | -92.9 (-94.7,-90.6) | -7.96 (-8.45,-7.48) |
| Romania | 14 (11,18) | 0.1 (0.1,0.2) | 2 (2,3) | 0 (0,0) | -75.3 (-82.1,-66.1) | -2.92 (-3.55,-2.28) |
| Russian Federation | 128 (104,151) | 0.2 (0.1,0.2) | 12 (9,15) | 0 (0,0) | -89.4 (-91.9,-86.3) | -7.05 (-7.49,-6.6) |
| Rwanda | 669 (482,905) | 22.4 (15.9,31) | 333 (213,480) | 4.9 (3.1,7.1) | -78.1 (-87.9,-63.6) | -5.3 (-5.56,-5.04) |
| Saint Kitts and Nevis | 1 (1,1) | 4 (3.4,4.6) | 0 (0,0) | 1.1 (0.9,1.5) | -71.1 (-78.7,-61.9) | -3.51 (-4.44,-2.57) |
| Saint Lucia | 0 (0,0) | 0.5 (0.4,0.6) | 0 (0,0) | 0.2 (0.1,0.2) | -65.7 (-76.1,-53) | -2.36 (-3.05,-1.67) |
| Saint Vincent and the Grenadines | 1 (0,1) | 0.9 (0.8,1.1) | 0 (0,0) | 0.5 (0.4,0.6) | -49.5 (-64.2,-33) | -1.98 (-2.53,-1.43) |
| Samoa | 0 (0,0) | 0.3 (0.2,0.5) | 0 (0,0) | 0.2 (0.1,0.3) | -43.9 (-74.3,19.4) | -0.83 (-1.51,-0.15) |
| San Marino | 0 (0,0) | 0 (0,0) | 0 (0,0) | 0 (0,0) | -65.9 (-86.8,-27.5) | -2.43 (-2.73,-2.14) |
| Sao Tome and Principe | 1 (1,2) | 3 (1.8,4.5) | 1 (0,1) | 0.6 (0.3,1) | -81.2 (-91.8,-61.6) | -5.87 (-6.45,-5.29) |
| Saudi Arabia | 77 (42,125) | 1.2 (0.7,1.9) | 23 (14,37) | 0.1 (0.1,0.2) | -91.6 (-96,-82) | -7.58 (-7.95,-7.2) |
| Senegal | 278 (202,359) | 8.1 (5.9,10.4) | 231 (152,345) | 2.9 (1.9,4.3) | -64.4 (-77.2,-44.3) | -2.67 (-2.97,-2.38) |
| Serbia | 8 (5,12) | 0.2 (0.1,0.3) | 1 (1,1) | 0 (0,0) | -87.7 (-93.3,-77.7) | -6.36 (-6.6,-6.12) |
| Seychelles | 1 (0,1) | 1.4 (0.9,2) | 0 (0,1) | 0.9 (0.6,1.4) | -34.1 (-64.2,7.9) | -1.23 (-1.45,-1.02) |
| Sierra Leone | 48 (30,68) | 2.5 (1.5,3.5) | 86 (50,131) | 1.9 (1.1,2.9) | -22.7 (-59.9,52.4) | -0.79 (-0.98,-0.6) |
| Singapore | 1 (0,1) | 0 (0,0) | 0 (0,0) | 0 (0,0) | -86.3 (-90,-81.7) | -5.86 (-6.12,-5.61) |
| Slovakia | 1 (1,2) | 0.1 (0,0.1) | 0 (0,0) | 0 (0,0) | -77.7 (-88.5,-61.8) | -3.66 (-4.49,-2.82) |
| Slovenia | 0 (0,1) | 0 (0,0.1) | 0 (0,0) | 0 (0,0) | -91.3 (-94,-88) | -6.54 (-7.08,-6) |
| Solomon Islands | 4 (2,6) | 2.5 (1,4.1) | 7 (4,10) | 1.9 (1.2,2.9) | -22.8 (-60.3,74.5) | -1.06 (-1.24,-0.88) |
| Somalia | 279 (180,396) | 8.3 (5.3,11.7) | 296 (190,433) | 3.2 (2,4.8) | -61.6 (-78.6,-37.2) | -3.15 (-3.24,-3.07) |
| South Africa | 466 (320,660) | 2.4 (1.6,3.4) | 232 (175,298) | 0.7 (0.5,0.9) | -70.1 (-80.6,-54.7) | -2.44 (-3.81,-1.05) |
| South Sudan | 223 (121,348) | 8.6 (4.7,13.4) | 312 (183,509) | 6.9 (4.1,11.3) | -19.2 (-57,39.6) | -0.66 (-0.78,-0.54) |
| Spain | 6 (5,7) | 0 (0,0) | 2 (2,2) | 0 (0,0) | -63.2 (-72.8,-52.6) | -2.63 (-2.97,-2.28) |
| Sri Lanka | 68 (42,101) | 0.7 (0.4,1) | 10 (6,16) | 0.1 (0.1,0.1) | -87.1 (-93.5,-75.5) | -6.89 (-7.16,-6.63) |
| Sudan | 1010 (686,1475) | 11.1 (7.6,16.3) | 354 (175,600) | 1.6 (0.8,2.7) | -85.4 (-93.5,-73.3) | -5.82 (-6.11,-5.53) |
| Suriname | 3 (1,4) | 1.2 (0.7,1.9) | 2 (1,3) | 0.7 (0.4,1.1) | -43.2 (-71.7,15) | -1.62 (-2.21,-1.03) |
| Sweden | 1 (1,2) | 0 (0,0) | 1 (0,1) | 0 (0,0) | -57.7 (-69.2,-42.3) | -1.36 (-2.44,-0.26) |
| Switzerland | 1 (1,2) | 0 (0,0) | 0 (0,0) | 0 (0,0) | -79.7 (-85,-73.1) | -5.07 (-5.46,-4.69) |
| Syrian Arab Republic | 88 (55,128) | 1.6 (1,2.3) | 7 (4,13) | 0.1 (0.1,0.2) | -93.7 (-96.8,-87) | -7.84 (-8.92,-6.74) |
| Taiwan (Province of China) | 7 (6,8) | 0.1 (0,0.1) | 1 (1,2) | 0 (0,0) | -80.4 (-85.8,-74.2) | -5.32 (-5.77,-4.87) |
| Tajikistan | 29 (22,36) | 1.1 (0.9,1.4) | 12 (7,18) | 0.2 (0.1,0.3) | -81 (-88.2,-70.8) | -5.79 (-6.64,-4.93) |
| Thailand | 51 (29,85) | 0.2 (0.1,0.3) | 38 (23,59) | 0.1 (0.1,0.2) | -22.5 (-59.7,58.6) | -0.58 (-1.33,0.19) |
| Timor-Leste | 25 (16,36) | 7.1 (4.4,10) | 7 (4,11) | 1.1 (0.6,1.7) | -84.9 (-91.3,-73.4) | -6.56 (-6.83,-6.28) |
| Togo | 82 (55,115) | 4.8 (3.2,6.8) | 66 (36,105) | 1.5 (0.8,2.4) | -69 (-83.1,-38.6) | -3.62 (-4.07,-3.17) |
| Tokelau | 0 (0,0) | 0.5 (0.2,0.9) | 0 (0,0) | 0.3 (0.2,0.5) | -38.8 (-71.5,22.9) | -2.5 (-2.93,-2.07) |
| Tonga | 0 (0,0) | 0.5 (0.3,0.8) | 0 (0,0) | 0.3 (0.1,0.4) | -48 (-75.7,0) | -1.14 (-1.76,-0.52) |
| Trinidad and Tobago | 4 (3,5) | 0.6 (0.5,0.8) | 3 (2,4) | 0.4 (0.3,0.6) | -31.5 (-54.7,-0.2) | -1 (-1.23,-0.77) |
| Tunisia | 44 (29,64) | 1.1 (0.7,1.5) | 9 (5,16) | 0.1 (0.1,0.3) | -86.2 (-93.1,-74.4) | -5.59 (-5.87,-5.3) |
| T眉rkiye | 557 (339,805) | 2 (1.2,2.8) | 34 (21,54) | 0.1 (0,0.1) | -96.1 (-97.9,-92.6) | -10.32 (-11.11,-9.51) |
| Turkmenistan | 16 (12,20) | 0.8 (0.7,1.1) | 11 (8,16) | 0.4 (0.3,0.6) | -49.5 (-67.4,-22.6) | -1.91 (-2.2,-1.63) |
| Tuvalu | 0 (0,0) | 1.1 (0.6,2.2) | 0 (0,0) | 0.4 (0.2,0.7) | -64.6 (-84.7,-26.4) | -3.42 (-3.58,-3.26) |
| Uganda | 612 (426,828) | 9.2 (6.3,12.8) | 686 (417,996) | 3.6 (2.2,5.2) | -61.1 (-78.5,-30.2) | -2.71 (-3.12,-2.31) |
| Ukraine | 43 (38,49) | 0.2 (0.2,0.2) | 4 (2,6) | 0 (0,0) | -86.8 (-92.8,-79.2) | -5.67 (-6.41,-4.93) |
| United Arab Emirates | 3 (1,5) | 0.4 (0.2,0.6) | 2 (1,3) | 0.1 (0,0.1) | -81.9 (-91.4,-59.2) | -4.72 (-5.97,-3.46) |
| United Kingdom | 13 (11,16) | 0 (0,0.1) | 3 (2,3) | 0 (0,0) | -81.9 (-85.6,-77) | -4.43 (-5.13,-3.72) |
| United Republic of Tanzania | 706 (536,895) | 5.8 (4.4,7.3) | 1259 (841,1770) | 4.3 (2.9,6) | -25.7 (-55.1,17.1) | 0.08 (-0.32,0.48) |
| United States of America | 85 (69,106) | 0.1 (0.1,0.1) | 79 (63,98) | 0.1 (0,0.1) | -18.8 (-36.9,5.6) | 0.12 (-0.17,0.41) |
| United States Virgin Islands | 0 (0,1) | 0.8 (0.5,1.2) | 0 (0,0) | 0.2 (0.1,0.3) | -78.4 (-88.9,-57.4) | -4.1 (-4.39,-3.81) |
| Uruguay | 4 (3,5) | 0.3 (0.2,0.3) | 1 (1,2) | 0.1 (0.1,0.1) | -67.5 (-75.8,-56.6) | -3.27 (-3.5,-3.04) |
| Uzbekistan | 85 (67,106) | 0.8 (0.6,1) | 33 (23,43) | 0.2 (0.1,0.2) | -78.4 (-85.8,-69.9) | -4.21 (-4.94,-3.48) |
| Vanuatu | 1 (0,1) | 1 (0.5,1.8) | 1 (1,2) | 0.8 (0.4,1.3) | -20.6 (-64.9,72) | -1.16 (-1.43,-0.9) |
| Venezuela (Bolivarian Republic of) | 105 (90,121) | 1 (0.9,1.2) | 89 (62,123) | 0.7 (0.5,0.9) | -35 (-56.1,-5.7) | -0.78 (-1.28,-0.27) |
| Viet Nam | 58 (27,96) | 0.2 (0.1,0.2) | 14 (8,24) | 0 (0,0) | -81.1 (-92,-57.4) | -5.27 (-5.89,-4.64) |
| Yemen | 423 (270,607) | 7.2 (4.6,10.4) | 280 (151,476) | 1.6 (0.9,2.8) | -77.5 (-88.5,-59.6) | -4.72 (-4.86,-4.58) |
| Zambia | 171 (125,229) | 4.4 (3.2,5.9) | 210 (121,319) | 2 (1.2,3.1) | -54.3 (-76.2,-25.5) | -2.41 (-2.6,-2.23) |
| Zimbabwe | 108 (73,152) | 2.2 (1.5,3.2) | 204 (120,321) | 2.5 (1.5,4) | 13.2 (-36.9,114.7) | 2.17 (1.23,3.13) |

MHD: maternal hypertensive disorder; ASR: age-standardized rate; ASMR: age-standardized mortality rate; EAPC: estimated annual percentage change.

**Table S5.** The DALY cases and ASDR of MHD in 1990 and 2021, along with the percentage change in the ASR per 100,000 population and the EAPC by location.

| Location | 1990 | | 2021 | | Percentage change in the ASR per 100,000 | EAPC (95% CI) |
| --- | --- | --- | --- | --- | --- | --- |
| No (95% UI) | ASR per 100,000 (95% UI) | No (95% UI) | ASR per 100,000 (95% UI) |
| Afghanistan | 24267 (15691,34755) | 578.9 (378.1,838.3) | 33755 (20872,51540) | 229.6 (140.4,354.8) | -60.3 (-75.9,-32.9) | -2.54 (-2.67,-2.41) |
| Albania | 141 (99,191) | 7.5 (5.3,10.2) | 31 (18,49) | 2.5 (1.4,4) | -66.6 (-79.1,-51.7) | -3.36 (-3.58,-3.13) |
| Algeria | 17372 (11588,23991) | 144.3 (96.4,200.1) | 4777 (3197,6685) | 20.6 (13.7,29) | -85.7 (-91.1,-76.2) | -5.58 (-5.9,-5.25) |
| American Samoa | 14 (9,20) | 56.6 (35.2,81.8) | 10 (6,16) | 47.5 (29.5,72.1) | -16 (-52.5,49.2) | 0.5 (0.11,0.89) |
| Andorra | 1 (1,1) | 2.9 (1.6,4.3) | 1 (0,1) | 1.7 (0.9,2.8) | -40.3 (-64,-7.9) | -1.44 (-1.54,-1.35) |
| Angola | 31112 (19811,46743) | 644.1 (405.5,974.6) | 34702 (20834,55788) | 230.3 (138.6,367) | -64.2 (-81.4,-29.9) | -3.68 (-3.95,-3.41) |
| Antigua and Barbuda | 7 (6,9) | 20.3 (16.7,24.4) | 5 (4,6) | 10.9 (9.1,13.4) | -46.4 (-57.5,-33.6) | -1.4 (-1.84,-0.96) |
| Argentina | 5561 (4441,6879) | 34.3 (27.4,42.5) | 2818 (2071,3748) | 11.9 (8.8,15.9) | -65.2 (-74.3,-53.6) | -2.64 (-2.93,-2.35) |
| Armenia | 292 (238,357) | 15.1 (12.3,18.4) | 35 (25,49) | 2.4 (1.7,3.2) | -84.1 (-88.7,-77.4) | -5.2 (-5.99,-4.41) |
| Australia | 502 (359,688) | 5.5 (4,7.6) | 352 (207,565) | 2.8 (1.7,4.5) | -49.2 (-63.6,-32.2) | -1.99 (-2.29,-1.69) |
| Austria | 114 (89,144) | 2.8 (2.2,3.5) | 51 (33,71) | 1.3 (0.8,1.8) | -54.4 (-66.6,-39.9) | -2.08 (-2.37,-1.79) |
| Azerbaijan | 1083 (841,1346) | 25.3 (19.6,31.5) | 214 (149,299) | 3.9 (2.7,5.3) | -84.7 (-90.1,-76.8) | -6.04 (-6.53,-5.55) |
| Bahamas | 60 (49,74) | 38.5 (31,47.1) | 36 (27,47) | 17.1 (12.8,22.4) | -55.5 (-69.6,-37.6) | -2.09 (-2.57,-1.6) |
| Bahrain | 102 (70,139) | 41 (28.2,56.4) | 50 (33,72) | 7.4 (5,10.7) | -81.8 (-88.7,-71.4) | -5.21 (-5.56,-4.86) |
| Bangladesh | 292455 (239523,352994) | 507.7 (412.8,608.9) | 48216 (31852,67934) | 50.7 (33.6,71.5) | -90 (-93.6,-85.4) | -7.86 (-8.25,-7.48) |
| Barbados | 34 (28,42) | 23.9 (19.5,28.8) | 14 (11,19) | 10.6 (8.2,14.2) | -55.5 (-65.8,-40.9) | -2.13 (-2.46,-1.79) |
| Belarus | 552 (441,692) | 10.7 (8.5,13.4) | 187 (114,292) | 4.8 (3,7.4) | -55.2 (-68.2,-39.1) | -2.09 (-2.42,-1.75) |
| Belgium | 225 (154,335) | 4.5 (3.1,6.6) | 182 (103,318) | 3.7 (2.1,6.4) | -17.7 (-40.3,6.9) | -0.71 (-0.9,-0.51) |
| Belize | 40 (33,49) | 42.6 (35.1,52.6) | 73 (59,90) | 29.3 (23.7,36) | -31.2 (-46.2,-8.9) | -0.37 (-0.77,0.03) |
| Benin | 11873 (8515,15640) | 509.2 (366.8,671.1) | 12178 (7769,17713) | 174.5 (112.3,252.5) | -65.7 (-80,-45.5) | -2.7 (-3.08,-2.32) |
| Bermuda | 5 (4,6) | 13.5 (10.8,17.2) | 1 (1,2) | 3.6 (2.2,5.9) | -73.4 (-81.9,-62.9) | -3.61 (-4.16,-3.06) |
| Bhutan | 1459 (907,2153) | 439.2 (273.1,650.5) | 209 (110,352) | 48.4 (25.5,81.3) | -89 (-94.5,-78.8) | -7.29 (-7.47,-7.11) |
| Bolivia (Plurinational State of) | 12184 (9053,15613) | 386.2 (288.7,498.2) | 8189 (5695,11789) | 129 (89.9,185.3) | -66.6 (-78.5,-47.2) | -3.83 (-3.96,-3.69) |
| Bosnia and Herzegovina | 99 (70,138) | 4.1 (2.9,5.7) | 31 (19,47) | 2.3 (1.4,3.4) | -43.6 (-62.4,-24.4) | -2.73 (-3.13,-2.32) |
| Botswana | 557 (339,804) | 75.2 (45.9,108.6) | 391 (254,537) | 28.2 (18.4,38.8) | -62.6 (-78.1,-35.3) | -2.54 (-3,-2.09) |
| Brazil | 75861 (67955,84657) | 93.7 (84,104.8) | 22843 (19469,26429) | 19.9 (17,23) | -78.7 (-81.8,-75.5) | -4.12 (-4.56,-3.68) |
| Brunei Darussalam | 53 (31,82) | 36.2 (21.6,56.6) | 18 (11,27) | 6.6 (4.2,10) | -81.7 (-90.5,-66.1) | -4.66 (-5.11,-4.21) |
| Bulgaria | 349 (288,426) | 9.1 (7.5,11.1) | 85 (63,117) | 3.5 (2.6,4.7) | -61.8 (-71.8,-49.5) | -2.54 (-2.93,-2.16) |
| Burkina Faso | 15375 (11035,20307) | 355.5 (253.7,473.9) | 22584 (15162,31820) | 193 (129.4,274) | -45.7 (-66.7,-14.8) | -1.9 (-2.07,-1.73) |
| Burundi | 14786 (9439,20281) | 570.6 (360.2,788) | 14088 (8955,20445) | 225.6 (144.6,327.4) | -60.5 (-76.6,-28.5) | -3.52 (-3.88,-3.17) |
| Cabo Verde | 160 (102,229) | 93.6 (59.8,133.8) | 66 (44,96) | 20.7 (13.8,30.1) | -77.9 (-87,-64.6) | -4.7 (-5.14,-4.26) |
| Cambodia | 15497 (11116,21206) | 299.9 (213.6,411) | 5294 (3299,8281) | 56.3 (35.4,88.7) | -81.2 (-89.1,-67.1) | -6.11 (-6.46,-5.76) |
| Cameroon | 19978 (14160,26993) | 368.7 (263.7,497.7) | 27090 (17941,37925) | 157.1 (105.1,220) | -57.4 (-73.8,-32.2) | -2 (-2.49,-1.51) |
| Canada | 355 (248,479) | 2.3 (1.6,3.1) | 242 (187,318) | 1.5 (1.1,2) | -36.3 (-53.5,-11) | -1.17 (-1.8,-0.54) |
| Central African Republic | 9778 (6907,12569) | 736.3 (517.7,952.9) | 11436 (7123,17375) | 407 (253.6,622.9) | -44.7 (-65.3,-6.6) | -1.55 (-1.93,-1.17) |
| Chad | 14625 (10499,18846) | 499.8 (359,641.9) | 38974 (25803,55814) | 447.1 (297.4,639.9) | -10.5 (-44.7,36.4) | -0.13 (-0.34,0.09) |
| Chile | 2302 (1922,2729) | 30.3 (25.4,35.8) | 759 (558,1009) | 7.9 (5.8,10.5) | -73.8 (-80.4,-65.9) | -3.77 (-4.34,-3.2) |
| China | 116632 (84105,155154) | 16.7 (12,22.2) | 17530 (12864,23654) | 2.8 (2.1,3.9) | -83 (-88,-74) | -5.33 (-5.59,-5.07) |
| Colombia | 16328 (12908,19910) | 87.2 (68.9,106.5) | 4124 (3097,5410) | 15.5 (11.6,20.3) | -82.2 (-88,-75) | -5.31 (-5.8,-4.81) |
| Comoros | 663 (336,998) | 329.8 (172.5,494.1) | 454 (284,705) | 116.2 (72.6,179.9) | -64.8 (-81.6,-26.2) | -4 (-4.47,-3.52) |
| Congo | 6095 (3819,8693) | 529.3 (328.1,762.4) | 6457 (3862,10292) | 223.7 (133,358) | -57.7 (-77.2,-25.4) | -2.63 (-3.29,-1.97) |
| Cook Islands | 1 (0,1) | 6.5 (3.8,10.7) | 0 (0,1) | 4 (2.2,6.8) | -38.7 (-53.2,-20.2) | -1.72 (-1.78,-1.65) |
| Costa Rica | 281 (232,337) | 17 (14,20.4) | 141 (108,181) | 5.3 (4.1,6.8) | -68.7 (-75.9,-60.4) | -4.23 (-4.62,-3.85) |
| C么te d'Ivoire | 22229 (15067,31982) | 387.1 (263.5,554) | 33964 (20648,53683) | 244.4 (148.1,387.6) | -36.9 (-64.2,17.8) | -1.07 (-1.36,-0.78) |
| Croatia | 136 (111,166) | 5.8 (4.7,7.1) | 27 (18,38) | 1.6 (1.1,2.3) | -72.5 (-81.4,-61.9) | -3.18 (-3.7,-2.66) |
| Cuba | 1075 (891,1295) | 16.6 (13.9,20) | 296 (222,399) | 6.4 (4.7,8.6) | -61.6 (-71,-50.6) | -2.49 (-3.01,-1.97) |
| Cyprus | 24 (15,36) | 5.9 (3.6,8.8) | 12 (7,18) | 1.5 (0.9,2.3) | -74.6 (-85.7,-56.9) | -5.3 (-5.66,-4.95) |
| Czechia | 243 (182,328) | 5.3 (3.9,7.2) | 131 (75,216) | 3.1 (1.8,5.2) | -40.3 (-60.7,-15.1) | -0.82 (-1.59,-0.04) |
| Democratic People's Republic of Korea | 8795 (4677,14401) | 78.4 (41.8,127.8) | 1304 (729,2220) | 10 (5.6,17) | -87.3 (-93.8,-73.4) | -6.39 (-6.49,-6.3) |
| Democratic Republic of the Congo | 103816 (67683,148432) | 605.2 (401.6,841.4) | 114502 (74750,160793) | 261.3 (172.8,362.8) | -56.8 (-73.9,-28.9) | -1.48 (-1.94,-1.03) |
| Denmark | 94 (70,122) | 3.7 (2.7,4.7) | 40 (27,59) | 1.6 (1.1,2.3) | -56.8 (-70.9,-38.1) | -3.18 (-3.65,-2.7) |
| Djibouti | 1224 (808,1794) | 566.8 (373.2,827.2) | 1996 (1101,3311) | 302.4 (166.7,502.7) | -46.7 (-71.8,-8.5) | -1.96 (-2.3,-1.61) |
| Dominica | 4 (2,6) | 10.1 (6.8,15.5) | 2 (1,3) | 6.6 (4.2,9.3) | -34.5 (-51.8,-10.2) | -1.31 (-1.68,-0.94) |
| Dominican Republic | 5210 (4093,6384) | 124.4 (97.4,152.1) | 2563 (1916,3385) | 42.8 (32,56.6) | -65.6 (-75.2,-51) | -2.64 (-3,-2.27) |
| Ecuador | 9023 (7800,10465) | 171.3 (149,198.6) | 4309 (3246,5652) | 44.7 (33.7,58.6) | -73.9 (-81.1,-65.3) | -3.97 (-4.32,-3.62) |
| Egypt | 32048 (22775,42626) | 116.7 (82.5,155.5) | 13575 (9359,18731) | 25.3 (17.4,34.9) | -78.3 (-86.4,-66.3) | -3.98 (-4.49,-3.46) |
| El Salvador | 4632 (3496,5814) | 162.9 (123.3,202.2) | 402 (274,554) | 11 (7.6,15.1) | -93.2 (-95.5,-90.6) | -7.54 (-9.02,-6.05) |
| Equatorial Guinea | 1392 (798,2128) | 677.4 (385.1,1040.7) | 1364 (653,2439) | 187.4 (89.6,332.1) | -72.3 (-87.4,-46.4) | -3.86 (-4.15,-3.57) |
| Eritrea | 10779 (7909,13577) | 629.8 (459.6,794.3) | 8538 (4984,13374) | 241.9 (141.6,379.5) | -61.6 (-79,-35.3) | -2.53 (-2.75,-2.31) |
| Estonia | 78 (61,104) | 10.9 (8.5,14.6) | 28 (15,49) | 5.2 (2.8,8.7) | -52.8 (-70.7,-33) | -1.59 (-2.07,-1.11) |
| Eswatini | 397 (254,576) | 99 (63.1,144.8) | 353 (181,596) | 54.9 (27.9,93.4) | -44.5 (-70.6,4.7) | -1.21 (-1.74,-0.67) |
| Ethiopia | 174725 (141124,208734) | 756.1 (606.3,902.8) | 75368 (51145,100712) | 137.1 (94.2,182.7) | -81.9 (-88.2,-74.2) | -6.18 (-6.57,-5.8) |
| Fiji | 201 (122,308) | 50.3 (30.6,77.2) | 173 (105,269) | 37.5 (22.7,58.1) | -25.5 (-62.1,43.7) | -1.3 (-1.53,-1.08) |
| Finland | 91 (59,138) | 3.6 (2.3,5.6) | 64 (36,105) | 2.8 (1.5,4.5) | -23.8 (-40.8,-3.6) | -1.19 (-1.44,-0.94) |
| France | 1569 (1194,2086) | 5.3 (4,7.1) | 919 (535,1535) | 3.4 (2,5.6) | -36.7 (-55.5,-13.3) | -1.76 (-1.93,-1.59) |
| Gabon | 1526 (1086,2088) | 322.6 (228.5,442) | 922 (520,1551) | 89.9 (51,150.7) | -72.1 (-85.1,-51) | -4.14 (-4.72,-3.55) |
| Gambia | 1970 (1234,2839) | 396.2 (247,573.7) | 3358 (2082,5137) | 264.8 (163.9,405.3) | -33.2 (-63.6,13.7) | -1.22 (-1.58,-0.86) |
| Georgia | 608 (502,739) | 21 (17.4,25.6) | 56 (44,68) | 3.6 (2.8,4.4) | -83.1 (-87.7,-78.1) | -4.75 (-5.42,-4.07) |
| Germany | 2218 (1679,3061) | 5.4 (4.1,7.4) | 1406 (803,2361) | 3.9 (2.3,6.6) | -26.9 (-47.4,-1.5) | -0.86 (-1.21,-0.5) |
| Ghana | 14941 (9557,21624) | 194.9 (126.4,281.7) | 18810 (13235,26401) | 96.2 (68.1,134.5) | -50.6 (-69.9,-16.1) | -1.68 (-1.92,-1.44) |
| Greece | 141 (104,198) | 2.8 (2.1,4) | 97 (61,146) | 2.4 (1.5,3.6) | -15.9 (-34.7,5.7) | -0.12 (-0.33,0.09) |
| Greenland | 2 (1,2) | 5 (3.3,7.2) | 1 (0,1) | 2.2 (1.4,3.2) | -56.2 (-73.1,-31.5) | -2.3 (-2.59,-2.01) |
| Grenada | 31 (25,37) | 71.4 (58.2,86.3) | 28 (21,35) | 53.7 (41.6,67.7) | -24.8 (-44.4,2.5) | -0.14 (-0.79,0.52) |
| Guam | 10 (7,15) | 13.6 (9.2,19.3) | 12 (8,16) | 16.5 (11.6,22.6) | 20.6 (-13.6,72.6) | 1.78 (1.32,2.24) |
| Guatemala | 9187 (7717,10799) | 231.8 (195.1,273.8) | 7237 (5459,9287) | 80.3 (60.4,103.1) | -65.4 (-75.2,-53.4) | -3.52 (-4.33,-2.7) |
| Guinea | 20256 (14705,26557) | 696.7 (504.6,909.9) | 25079 (15735,37675) | 358.9 (225.2,537.3) | -48.5 (-68.4,-10.8) | -1.61 (-1.79,-1.42) |
| Guinea-Bissau | 2386 (1523,3442) | 465.9 (295.9,673.8) | 2096 (1292,3342) | 186.1 (113.7,298) | -60.1 (-78.7,-32.8) | -2.91 (-3.18,-2.64) |
| Guyana | 342 (254,444) | 76 (56.4,98.7) | 215 (147,298) | 50.6 (34.5,70.1) | -33.5 (-57.1,0.9) | -0.93 (-1.2,-0.65) |
| Haiti | 14804 (10702,20304) | 478.4 (343.6,656.4) | 25590 (15494,38500) | 353.8 (214.4,532.6) | -26.1 (-54.9,12.8) | -0.29 (-0.57,-0.01) |
| Honduras | 5883 (4470,7423) | 262.8 (197.7,331) | 3657 (1861,6499) | 63 (32.2,111.4) | -76 (-88.4,-53.7) | -4.62 (-4.83,-4.4) |
| Hungary | 262 (218,316) | 5.6 (4.6,6.8) | 72 (50,101) | 1.9 (1.4,2.6) | -65.6 (-74.8,-54) | -2.22 (-3.22,-1.21) |
| Iceland | 6 (5,8) | 4.7 (3.6,6.1) | 4 (3,6) | 2.5 (1.6,3.8) | -46.8 (-59.4,-29.1) | -1.93 (-2.18,-1.67) |
| India | 736898 (623994,860544) | 170.7 (145,199.5) | 353143 (286475,432750) | 45.6 (36.9,55.9) | -73.3 (-79.4,-64.6) | -4.57 (-4.93,-4.21) |
| Indonesia | 300869 (243483,361654) | 296.1 (239.7,355.5) | 123076 (94058,167146) | 81.8 (62.5,111.5) | -72.4 (-80.3,-60) | -3.96 (-4.11,-3.81) |
| Iran (Islamic Republic of) | 12478 (9019,16452) | 48.7 (35.1,64.2) | 2508 (1593,3843) | 5.2 (3.3,7.9) | -89.3 (-93,-84.5) | -6.33 (-6.78,-5.87) |
| Iraq | 4908 (3106,7251) | 62.5 (39.3,92.3) | 2516 (1633,3772) | 12.1 (7.8,18.1) | -80.7 (-88.6,-67.7) | -4.88 (-5.24,-4.52) |
| Ireland | 66 (51,86) | 3.8 (2.9,4.9) | 44 (28,68) | 1.9 (1.3,2.9) | -48.5 (-63.1,-29.6) | -1.61 (-2.06,-1.15) |
| Israel | 130 (96,174) | 5.3 (3.9,7.1) | 169 (93,274) | 3.9 (2.1,6.3) | -26 (-51.3,5.7) | -1.32 (-1.65,-0.99) |
| Italy | 1096 (849,1473) | 3.8 (3,5.1) | 381 (263,533) | 1.7 (1.1,2.3) | -56.6 (-64.5,-46.8) | -2.03 (-2.37,-1.69) |
| Jamaica | 514 (414,635) | 39.5 (31.9,48.7) | 403 (279,584) | 25.3 (17.5,36.4) | -36.1 (-55,-4.9) | -3.21 (-3.87,-2.55) |
| Japan | 2656 (1890,3891) | 4.6 (3.3,6.8) | 1130 (735,1714) | 2.4 (1.6,3.6) | -48.3 (-57.4,-37.7) | -2.52 (-2.99,-2.05) |
| Jordan | 2251 (1562,3068) | 150 (104.7,202.3) | 397 (251,585) | 6.5 (4.1,9.5) | -95.7 (-97.5,-92.2) | -10.45 (-10.81,-10.09) |
| Kazakhstan | 2800 (2309,3374) | 31.6 (26.4,38.1) | 846 (630,1145) | 8.7 (6.5,11.7) | -72.5 (-79.4,-63.2) | -4.28 (-4.68,-3.88) |
| Kenya | 31346 (22717,40724) | 310.4 (225.8,405.6) | 34174 (22590,48046) | 129.4 (86.2,181.5) | -58.3 (-75.3,-33.4) | -2 (-2.44,-1.55) |
| Kiribati | 34 (22,48) | 85.1 (56.9,123.4) | 28 (17,44) | 42.6 (25.6,67.4) | -49.9 (-74.9,-13.1) | -2.3 (-2.53,-2.07) |
| Kuwait | 74 (51,109) | 8.2 (5.7,12.2) | 103 (63,168) | 3.1 (1.9,5.1) | -61.8 (-70.3,-51.9) | -3.53 (-4.32,-2.72) |
| Kyrgyzstan | 2219 (1897,2592) | 98 (83.7,114.7) | 673 (529,867) | 18.5 (14.5,23.6) | -81.1 (-85.4,-76) | -4.34 (-4.92,-3.75) |
| Lao People's Democratic Republic | 6319 (4292,8871) | 312.6 (212.3,441.6) | 1691 (891,3017) | 41.1 (21.6,73.3) | -86.8 (-93.4,-75) | -6.7 (-6.87,-6.52) |
| Latvia | 111 (82,156) | 9 (6.6,12.6) | 35 (19,61) | 4.6 (2.6,7.9) | -48.5 (-65.2,-30) | -2.05 (-2.82,-1.26) |
| Lebanon | 436 (274,679) | 28.1 (17.7,43.9) | 142 (90,211) | 4.6 (2.9,6.8) | -83.7 (-90.9,-72) | -5.46 (-5.61,-5.3) |
| Lesotho | 1144 (796,1599) | 145.4 (100.6,201.2) | 1247 (761,1939) | 118 (71.6,183.6) | -18.9 (-55.5,48.3) | 0.23 (-0.38,0.85) |
| Liberia | 9023 (6140,12441) | 770.6 (526.6,1060.4) | 3893 (2453,5813) | 126.4 (80.3,187) | -83.6 (-90.4,-74.4) | -5.45 (-5.66,-5.25) |
| Libya | 1231 (730,1818) | 75.5 (44.9,111.6) | 514 (307,805) | 12.4 (7.4,19.4) | -83.5 (-91.6,-70.3) | -5.1 (-5.51,-4.7) |
| Lithuania | 218 (168,295) | 11.9 (9.2,16) | 59 (34,99) | 5.2 (3,8.7) | -56.1 (-70.4,-39.3) | -3.03 (-3.78,-2.28) |
| Luxembourg | 8 (6,9) | 3.7 (3,4.5) | 4 (3,6) | 1.3 (1,1.7) | -64.2 (-74.3,-52.6) | -3.58 (-3.93,-3.23) |
| Madagascar | 21134 (15151,27888) | 368.1 (264.1,488.9) | 32254 (21868,44555) | 216.3 (146.4,301.4) | -41.2 (-63.6,-8.2) | -1.63 (-1.98,-1.26) |
| Malawi | 22956 (17396,30393) | 540.5 (405.9,707) | 17531 (11218,26575) | 187.5 (121.9,276.9) | -65.3 (-79.1,-44.6) | -3.18 (-3.53,-2.83) |
| Malaysia | 3797 (2478,5335) | 40.6 (26.5,56.9) | 2288 (1691,3027) | 13.1 (9.7,17.2) | -67.9 (-78.7,-50.5) | -3.71 (-4.12,-3.31) |
| Maldives | 117 (83,153) | 116.1 (83.3,150.7) | 20 (14,28) | 8.3 (5.6,11.7) | -92.8 (-95.5,-88.8) | -8.23 (-8.77,-7.68) |
| Mali | 17248 (14404,20454) | 411.2 (343.8,485.9) | 24579 (18152,33528) | 201.4 (147.3,273.4) | -51 (-64.6,-33.6) | -2.09 (-2.28,-1.91) |
| Malta | 12 (9,16) | 6.6 (5.1,8.6) | 6 (4,10) | 3.4 (2.3,5.1) | -49 (-62.2,-35.8) | -1.81 (-2.16,-1.46) |
| Marshall Islands | 9 (5,16) | 44.3 (26.1,75.8) | 9 (5,15) | 31.3 (18.1,51.4) | -29.4 (-64.2,27.5) | -1.18 (-1.66,-0.7) |
| Mauritania | 9486 (7288,12036) | 972.1 (741.6,1231.9) | 4071 (2292,6600) | 186.4 (104.3,299.7) | -80.8 (-89.3,-67.3) | -5.09 (-5.21,-4.96) |
| Mauritius | 181 (148,220) | 28.2 (23,34.2) | 69 (56,84) | 11 (8.9,13.4) | -61.2 (-69.3,-51.1) | -3.64 (-3.92,-3.37) |
| Mexico | 30981 (26597,36711) | 66.3 (57,78.7) | 12874 (9776,16297) | 18.4 (14,23.3) | -72.2 (-78.7,-65.3) | -3.98 (-4.11,-3.85) |
| Micronesia (Federated States of) | 33 (20,50) | 69.1 (41.5,104.7) | 10 (6,16) | 18.4 (11.3,28.8) | -73.4 (-85,-55.2) | -3.71 (-4.12,-3.31) |
| Monaco | 1 (0,1) | 3.9 (2.3,5.9) | 0 (0,1) | 3.2 (1.9,5) | -17 (-48.6,22.8) | -0.48 (-0.55,-0.41) |
| Mongolia | 790 (539,1087) | 70.7 (47.8,96.6) | 206 (143,291) | 11.9 (8.2,16.8) | -83.2 (-89.6,-73.2) | -6.4 (-6.87,-5.93) |
| Montenegro | 10 (6,16) | 3.1 (1.8,4.8) | 7 (4,11) | 2.5 (1.3,4.2) | -20.1 (-45.3,5.4) | -0.6 (-0.73,-0.47) |
| Morocco | 39283 (29744,52113) | 316.1 (239.3,416.4) | 6400 (3677,10505) | 32.5 (18.7,53.3) | -89.7 (-94.3,-81.9) | -7.18 (-7.5,-6.86) |
| Mozambique | 25325 (18707,34137) | 395.8 (290.8,537) | 28570 (18088,42806) | 192.1 (118.5,295.2) | -51.5 (-72.2,-17.9) | -1.45 (-1.73,-1.18) |
| Myanmar | 26337 (19023,35751) | 113.4 (82.3,154.7) | 20877 (14196,28910) | 68.7 (46.9,95.1) | -39.4 (-61.8,-7.2) | -1.39 (-1.52,-1.27) |
| Namibia | 1282 (886,1752) | 183.1 (126.8,252.4) | 712 (400,1300) | 52.7 (29.6,96.2) | -71.2 (-83.9,-41.6) | -3.91 (-4.41,-3.4) |
| Nauru | 7 (4,11) | 133.7 (74.2,224.1) | 6 (3,9) | 97.2 (53.7,166.6) | -27.3 (-64.7,36.2) | -0.73 (-1.13,-0.32) |
| Nepal | 35073 (22124,50274) | 365.9 (230.9,524.2) | 8676 (4966,14531) | 45.5 (26,76.2) | -87.6 (-93.4,-75.1) | -6.49 (-6.72,-6.26) |
| Netherlands | 443 (370,533) | 5.4 (4.6,6.5) | 156 (105,221) | 2.2 (1.5,3.1) | -60.4 (-71.7,-46.4) | -3.09 (-3.27,-2.9) |
| New Zealand | 153 (97,234) | 8.3 (5.3,12.6) | 92 (56,146) | 3.7 (2.3,5.9) | -54.8 (-63.3,-42.7) | -2.33 (-2.74,-1.91) |
| Nicaragua | 1400 (1086,1705) | 71.7 (55.9,87.3) | 657 (503,831) | 17.5 (13.4,22.2) | -75.6 (-82.5,-65.5) | -4.71 (-4.93,-4.5) |
| Niger | 18619 (14095,24650) | 500.6 (381.3,663.9) | 36291 (22350,53409) | 322.7 (199.6,472.1) | -35.5 (-60.6,-1.2) | -1.54 (-1.68,-1.41) |
| Nigeria | 198866 (133882,275413) | 427.5 (287.5,589.7) | 356825 (233793,536385) | 300.8 (198.8,447) | -29.6 (-57.9,17.5) | -1.3 (-1.41,-1.18) |
| Niue | 0 (0,0) | 30.8 (16.9,50.4) | 0 (0,0) | 22 (14.2,32.5) | -28.6 (-65.5,39) | -2.26 (-2.67,-1.85) |
| North Macedonia | 111 (77,149) | 10.8 (7.5,14.4) | 31 (20,48) | 3.1 (2,4.7) | -71.1 (-82.8,-56) | -3.62 (-3.97,-3.26) |
| Northern Mariana Islands | 7 (4,11) | 24.2 (14.2,37.1) | 3 (2,5) | 16.5 (10.6,24) | -31.9 (-61.3,16.2) | -0.33 (-0.65,-0.01) |
| Norway | 170 (124,235) | 8.1 (5.9,11.2) | 87 (50,143) | 3.5 (2,5.8) | -56.5 (-68.7,-45.4) | -3.16 (-3.75,-2.57) |
| Oman | 502 (274,865) | 71.2 (38.9,122.5) | 239 (155,359) | 10.7 (6.9,16.1) | -84.9 (-92.3,-69.1) | -5.49 (-5.95,-5.03) |
| Pakistan | 249689 (161225,350617) | 509.4 (328.3,714.6) | 336427 (191203,535183) | 267.8 (151.1,427.9) | -47.4 (-75,-1.9) | -2.21 (-2.41,-2.02) |
| Palau | 3 (2,4) | 31 (18.2,47.4) | 1 (1,2) | 22.7 (14.6,34.9) | -26.7 (-62.4,27.3) | -0.26 (-0.61,0.09) |
| Palestine | 289 (173,440) | 32.4 (19.5,48.5) | 186 (123,266) | 6.9 (4.6,9.8) | -78.8 (-87.2,-64.9) | -4.54 (-5.29,-3.79) |
| Panama | 562 (467,668) | 42.5 (35.4,50.2) | 372 (284,467) | 17.2 (13.1,21.6) | -59.5 (-69.5,-47.5) | -2.44 (-2.88,-1.99) |
| Papua New Guinea | 2023 (1035,3076) | 98.9 (51.3,149.4) | 4124 (2742,5803) | 75.2 (50.2,105.6) | -23.9 (-55.9,49.9) | -0.71 (-0.96,-0.46) |
| Paraguay | 1768 (1394,2230) | 89.7 (70.9,112.9) | 1367 (963,1931) | 34.8 (24.6,49.2) | -61.2 (-74.4,-41.4) | -2.95 (-3.18,-2.71) |
| Peru | 18775 (14377,23821) | 161.9 (123.9,206.5) | 8385 (5380,12527) | 43 (27.7,64.2) | -73.4 (-84.4,-55.8) | -4.81 (-5.31,-4.32) |
| Philippines | 35703 (26680,45224) | 112.1 (83.4,142.9) | 34317 (25908,46620) | 57.4 (43.3,77.9) | -48.8 (-66.1,-22.8) | -1.55 (-1.74,-1.37) |
| Poland | 1022 (779,1385) | 5.7 (4.3,7.8) | 251 (155,385) | 1.5 (0.9,2.3) | -73.5 (-80.9,-65.5) | -4.15 (-4.5,-3.79) |
| Portugal | 225 (181,293) | 4.5 (3.6,5.9) | 98 (70,133) | 2.3 (1.6,3.1) | -49.7 (-61.6,-33.9) | -1.95 (-2.36,-1.55) |
| Puerto Rico | 460 (379,561) | 23.9 (19.7,29.1) | 109 (83,145) | 7.7 (5.8,10.2) | -67.8 (-75,-59.2) | -3.75 (-4.21,-3.3) |
| Qatar | 32 (20,46) | 18.7 (11.5,26.5) | 48 (28,80) | 3.6 (2.2,5.9) | -80.5 (-89,-68.6) | -6.23 (-6.83,-5.64) |
| Republic of Korea | 2011 (1556,2499) | 7.3 (5.6,9) | 208 (147,281) | 0.9 (0.6,1.2) | -87.4 (-91.7,-80.8) | -6.59 (-6.99,-6.19) |
| Republic of Moldova | 374 (300,466) | 16.6 (13.3,20.8) | 63 (38,102) | 4 (2.4,6.5) | -75.7 (-83.8,-65.6) | -4.15 (-4.77,-3.52) |
| Romania | 1208 (956,1552) | 10.8 (8.5,13.9) | 409 (277,622) | 5.8 (3.9,8.8) | -46.6 (-62.4,-26.5) | -1.13 (-1.68,-0.57) |
| Russian Federation | 11307 (9071,14170) | 15.5 (12.4,19.6) | 3982 (2410,6338) | 6.4 (3.9,10.1) | -58.9 (-72,-45.1) | -2.52 (-2.79,-2.24) |
| Rwanda | 39818 (28921,53509) | 1275.2 (918.3,1729.5) | 20085 (13062,28528) | 288.6 (187.9,409.9) | -77.4 (-87.3,-63.1) | -5.17 (-5.43,-4.9) |
| Saint Kitts and Nevis | 54 (46,63) | 242.9 (207.6,283.5) | 22 (17,28) | 73.5 (56.5,93.7) | -69.8 (-77,-60.5) | -3.4 (-4.27,-2.52) |
| Saint Lucia | 25 (21,30) | 33.3 (27.4,40.2) | 10 (8,14) | 12.2 (9.5,15.7) | -63.4 (-73.2,-52.4) | -2.4 (-2.96,-1.84) |
| Saint Vincent and the Grenadines | 37 (30,45) | 62.3 (51,75.9) | 18 (14,22) | 32.5 (26,40.9) | -47.8 (-61.6,-32.2) | -1.88 (-2.39,-1.36) |
| Samoa | 20 (12,30) | 25.3 (15.1,38) | 17 (11,27) | 17.5 (11.2,27.2) | -30.7 (-61.6,22.5) | -0.35 (-0.85,0.15) |
| San Marino | 0 (0,0) | 2.5 (1.5,3.8) | 0 (0,0) | 2 (1.1,3.4) | -17.9 (-46.7,21.7) | -0.3 (-0.4,-0.19) |
| Sao Tome and Principe | 100 (64,146) | 195.1 (124.5,285.1) | 46 (26,75) | 41 (23.9,66.8) | -79 (-89.3,-61.3) | -5.49 (-6.03,-4.95) |
| Saudi Arabia | 5182 (2981,8003) | 79.3 (45.8,121) | 1921 (1249,2892) | 8.6 (5.7,13) | -89.1 (-93.9,-79.4) | -6.94 (-7.19,-6.69) |
| Senegal | 17700 (12907,22680) | 499.9 (364.5,635.5) | 15126 (10142,22312) | 185.3 (123.8,270.7) | -62.9 (-75.7,-43.2) | -2.57 (-2.85,-2.29) |
| Serbia | 582 (377,831) | 12.7 (8.2,18.1) | 98 (66,140) | 2.5 (1.7,3.6) | -79.9 (-87.9,-67) | -5.11 (-5.44,-4.78) |
| Seychelles | 32 (21,44) | 86.6 (57.2,120.6) | 28 (19,40) | 58.8 (39.2,83.2) | -32 (-61.1,7.3) | -1.11 (-1.33,-0.9) |
| Sierra Leone | 3341 (2237,4594) | 162.3 (108.7,226.8) | 5808 (3677,8575) | 124.3 (79.1,182.8) | -23.4 (-56,37.8) | -0.83 (-1.01,-0.65) |
| Singapore | 54 (42,74) | 2.7 (2,3.6) | 37 (20,64) | 1.2 (0.7,2) | -55.5 (-71.4,-38.4) | -2.5 (-2.73,-2.27) |
| Slovakia | 137 (93,192) | 5.3 (3.6,7.5) | 60 (36,97) | 2.6 (1.6,4.1) | -51.5 (-69.1,-32.3) | -1.38 (-2.22,-0.52) |
| Slovenia | 47 (35,64) | 4.7 (3.5,6.5) | 26 (14,45) | 3.2 (1.8,5.6) | -31.7 (-56.3,-3.6) | -0.99 (-1.47,-0.5) |
| Solomon Islands | 250 (116,402) | 157.3 (72.5,256) | 430 (275,633) | 121.3 (77.1,179) | -22.9 (-58.7,62.9) | -1.04 (-1.21,-0.87) |
| Somalia | 17604 (11621,24702) | 511 (335.4,715.3) | 19523 (12874,27796) | 202.5 (132.4,290.1) | -60.4 (-76.5,-38.1) | -3.04 (-3.12,-2.97) |
| South Africa | 30368 (21381,42259) | 151.6 (106.9,212.2) | 15767 (12013,19652) | 48.8 (37.3,61) | -67.8 (-78.4,-53.1) | -2.37 (-3.6,-1.13) |
| South Sudan | 14387 (8009,22151) | 531.2 (296.2,810.9) | 19693 (12013,31526) | 428.1 (260.7,684.3) | -19.4 (-56.3,35) | -0.68 (-0.8,-0.57) |
| Spain | 813 (550,1195) | 4.2 (2.8,6.2) | 503 (333,738) | 2.7 (1.8,3.9) | -35.7 (-51.9,-13.8) | -0.67 (-0.96,-0.38) |
| Sri Lanka | 4604 (2958,6699) | 46.9 (30.1,68.2) | 945 (649,1358) | 8.6 (5.9,12.4) | -81.7 (-89.4,-67.8) | -5.71 (-5.94,-5.49) |
| Sudan | 60980 (41881,88426) | 652.9 (447.5,951.5) | 21391 (10903,35514) | 95.3 (49.2,158.4) | -85.4 (-93.3,-73.8) | -5.81 (-6.1,-5.52) |
| Suriname | 174 (99,261) | 81.6 (47,122.3) | 134 (85,200) | 46.5 (29.5,69.5) | -43 (-69.5,12.2) | -1.61 (-2.19,-1.03) |
| Sweden | 148 (115,193) | 3.8 (2.9,4.9) | 92 (65,131) | 2 (1.5,2.9) | -45.7 (-58.3,-30.3) | -1.21 (-1.76,-0.66) |
| Switzerland | 135 (102,188) | 3.7 (2.8,5.2) | 83 (49,135) | 2 (1.2,3.2) | -45.9 (-62.4,-27) | -1.38 (-1.69,-1.07) |
| Syrian Arab Republic | 5781 (3752,8313) | 101.7 (66.1,146.7) | 614 (374,944) | 8.7 (5.3,13.3) | -91.5 (-95.1,-84.5) | -7.1 (-8.01,-6.18) |
| Taiwan (Province of China) | 536 (436,668) | 4.4 (3.6,5.5) | 163 (113,237) | 1.5 (1,2.1) | -66.9 (-76.6,-55.4) | -3.63 (-4.13,-3.13) |
| Tajikistan | 1806 (1415,2275) | 69.5 (54.7,87.9) | 773 (512,1136) | 14.2 (9.5,20.8) | -79.5 (-87.1,-69) | -5.53 (-6.35,-4.7) |
| Thailand | 4068 (2501,6112) | 11.9 (7.3,18) | 2842 (1894,4133) | 9.2 (6.2,13.5) | -22.8 (-53.2,34.9) | -0.65 (-1.26,-0.05) |
| Timor-Leste | 1495 (958,2104) | 403.1 (255.6,567.2) | 419 (265,655) | 64 (40.2,99) | -84.1 (-90.5,-73.2) | -6.37 (-6.64,-6.1) |
| Togo | 5339 (3568,7418) | 301.8 (202.4,419.9) | 4461 (2640,6946) | 100.2 (59.5,156.3) | -66.8 (-80.9,-37.9) | -3.34 (-3.76,-2.93) |
| Tokelau | 0 (0,0) | 34.2 (18.8,58.5) | 0 (0,0) | 23.2 (15.1,35.1) | -32.2 (-65.1,20.5) | -2.01 (-2.38,-1.65) |
| Tonga | 18 (11,25) | 40.2 (26.3,57) | 12 (8,17) | 23.2 (15.1,33.7) | -42.5 (-65.5,-11.2) | -1.2 (-1.55,-0.85) |
| Trinidad and Tobago | 287 (239,342) | 43.8 (36.4,51.9) | 198 (146,270) | 30 (22.1,40.7) | -31.6 (-52.4,-3.5) | -0.97 (-1.18,-0.76) |
| Tunisia | 2875 (1960,4076) | 67.3 (46.1,95.2) | 668 (391,1083) | 10.8 (6.3,17.5) | -84 (-91.2,-72.5) | -5.18 (-5.46,-4.9) |
| T眉rkiye | 34823 (21847,49718) | 119.8 (75,171) | 3284 (2208,4682) | 7.6 (5.1,10.8) | -93.7 (-96.3,-89.1) | -8.47 (-9.1,-7.84) |
| Turkmenistan | 1011 (801,1286) | 52.7 (41.7,66.9) | 702 (503,1011) | 27.3 (19.6,39.3) | -48.1 (-65.3,-23.1) | -1.85 (-2.12,-1.59) |
| Tuvalu | 4 (2,7) | 74.3 (40.6,139.4) | 2 (1,3) | 28.6 (16.9,45.5) | -61.5 (-81.1,-26.8) | -3.16 (-3.31,-3.01) |
| Uganda | 37406 (26880,49537) | 529.1 (370.2,716) | 43643 (27610,62967) | 216.3 (137.8,310.9) | -59.1 (-76.2,-29.3) | -2.57 (-2.97,-2.16) |
| Ukraine | 3882 (3192,4812) | 16.3 (13.4,20.3) | 880 (529,1386) | 5 (3.1,7.8) | -69.2 (-79.5,-58.8) | -3.02 (-3.66,-2.37) |
| United Arab Emirates | 179 (99,295) | 24.5 (13.6,40.4) | 212 (139,308) | 6.5 (4.3,9.4) | -73.5 (-85.7,-49.9) | -3.48 (-4.33,-2.63) |
| United Kingdom | 1483 (1137,1993) | 5.2 (4,6.9) | 898 (541,1465) | 2.9 (1.7,4.6) | -44.5 (-59.2,-30.6) | -1.26 (-1.55,-0.97) |
| United Republic of Tanzania | 46416 (35781,58142) | 363.9 (282.1,454.3) | 80149 (54007,111582) | 263.2 (179.2,365.9) | -27.7 (-54.5,11.4) | -0.11 (-0.49,0.26) |
| United States of America | 11081 (8114,15543) | 8.3 (6.1,11.7) | 10877 (7764,14652) | 7.1 (5.1,9.6) | -14 (-28.9,3.5) | -0.29 (-0.48,-0.1) |
| United States Virgin Islands | 30 (18,44) | 54.5 (32.8,80.8) | 4 (3,7) | 14.3 (9.7,20.8) | -73.8 (-84.8,-53.3) | -3.65 (-3.89,-3.41) |
| Uruguay | 305 (255,369) | 20.2 (16.8,24.4) | 152 (114,209) | 9.3 (7,12.8) | -53.7 (-64.1,-40.9) | -2.33 (-2.49,-2.17) |
| Uzbekistan | 5442 (4340,6667) | 50.8 (40.7,62.5) | 2251 (1691,2942) | 12.1 (9.1,15.9) | -76.1 (-83.5,-67.2) | -3.95 (-4.61,-3.28) |
| Vanuatu | 44 (24,76) | 62 (33,108.5) | 74 (45,120) | 47.6 (28.9,77.1) | -23.2 (-62.6,48.5) | -1.23 (-1.48,-0.99) |
| Venezuela (Bolivarian Republic of) | 6791 (5846,7821) | 65.9 (56.7,76) | 5748 (4136,7801) | 44.3 (32.1,60) | -32.7 (-53.3,-4.6) | -0.68 (-1.16,-0.19) |
| Viet Nam | 5051 (2960,7861) | 13.1 (7.7,20.3) | 2024 (1222,3083) | 3.9 (2.4,6) | -70 (-83.4,-49.7) | -3.63 (-4.1,-3.16) |
| Yemen | 27578 (17877,39129) | 461.6 (300.1,654.3) | 18603 (10783,30726) | 106.4 (61.7,176.2) | -77 (-87.5,-59.9) | -4.66 (-4.8,-4.52) |
| Zambia | 11719 (8712,15499) | 291.1 (217.4,382.4) | 14591 (8852,21747) | 136.6 (83.9,203) | -53.1 (-74.3,-27.2) | -2.31 (-2.49,-2.12) |
| Zimbabwe | 7491 (5228,10304) | 148.2 (102.5,203.9) | 13156 (8115,20097) | 158.2 (97.3,244.1) | 6.7 (-37.3,92) | 1.85 (1,2.71) |

MHD: maternal hypertensive disorder; ASR: age-standardized rate; DALY: disability-adjusted life years; ASDR: age-standardized DALYs rate; EAPC: estimated annual percentage change.

**Table S6.** Age-specific of the incidence cases and ASIR of MHD in 1990 and 2021, along with the percentage change in the ASR per 100,000 population and the EAPC by location.

| Location | Age groups | 1990 | | 2021 | | EAPC (95% CI) |
| --- | --- | --- | --- | --- | --- | --- |
| No (95% UI) | ASR per 100,000 (95% UI) | No (95% UI) | ASR per 100,000 (95% UI) |
| Global | 10 to 19 | 1882962 (1300440,2657421) | 353.8 (244.3,499.2) | 1429266 (1017225,1983728) | 225.9 (160.7,313.5) | -1.42 (-1.51,-1.32) |
| 20 to 34 | 11208964 (7969890,15289968) | 1704.8 (1215.1,2321.7) | 12900300 (9532555,16774211) | 1459.7 (1077.7,1898.5) | -0.43 (-0.51,-0.34) |
| 35 to 54 | 2570970 (1864850,3343997) | 452.9 (328.8,588.3) | 3720519 (2794153,4689472) | 390.4 (293.1,492.1) | -0.32 (-0.49,-0.14) |
| High SDI | 10 to 19 | 112669 (74490,164688) | 170.1 (112.5,248.6) | 23390 (17258,31389) | 38.6 (28.5,51.9) | -5.27 (-5.42,-5.11) |
| 20 to 34 | 965414 (643354,1410834) | 918.4 (610.9,1343.9) | 842784 (620520,1129734) | 785.8 (578.5,1053.2) | -0.79 (-1,-0.59) |
| 35 to 54 | 155438 (108590,216121) | 135 (94.3,187.7) | 369070 (270354,486515) | 278.4 (203.7,367.4) | 2.34 (2.25,2.43) |
| High-middle SDI | 10 to 19 | 142959 (92433,209524) | 145 (93.8,212.5) | 40640 (27955,57143) | 56.6 (38.9,79.6) | -2.86 (-3.01,-2.71) |
| 20 to 34 | 1187286 (766327,1751309) | 869 (561.4,1281.4) | 884955 (619644,1239601) | 674.9 (471,945.4) | -0.15 (-0.5,0.21) |
| 35 to 54 | 158273 (103953,224764) | 122 (80.3,172.9) | 323784 (233241,431338) | 188.6 (135.7,251.4) | 2.52 (2.04,3.01) |
| Middle SDI | 10 to 19 | 461085 (324204,642296) | 240.6 (169.2,335) | 260780 (197180,342996) | 142.5 (107.8,187.5) | -1.38 (-1.51,-1.25) |
| 20 to 34 | 2996494 (2054101,4215171) | 1328.8 (915.3,1865.1) | 2660893 (1939390,3562842) | 960.6 (699.3,1286.2) | -0.66 (-0.81,-0.51) |
| 35 to 54 | 599390 (427983,799166) | 337.4 (241.4,448.5) | 779583 (573675,1016784) | 247.7 (182.2,323.2) | -0.61 (-0.9,-0.32) |
| Low-middle SDI | 10 to 19 | 668578 (455973,926461) | 545.4 (371.9,755.8) | 457215 (321322,628496) | 242.8 (170.6,333.7) | -2.62 (-2.9,-2.33) |
| 20 to 34 | 3230245 (2317149,4338635) | 2390.1 (1717.6,3207.2) | 3736583 (2756906,4870410) | 1543.6 (1140,2011.1) | -1.57 (-1.78,-1.37) |
| 35 to 54 | 835508 (598153,1115836) | 797.9 (571.4,1064.9) | 909206 (681003,1155530) | 404.6 (303.2,513.9) | -2.31 (-2.41,-2.2) |
| Low SDI | 10 to 19 | 496302 (342608,710030) | 945.8 (652.9,1353.3) | 646253 (452381,924754) | 502.4 (351.7,718.9) | -2.06 (-2.22,-1.9) |
| 20 to 34 | 2822408 (2082220,3624523) | 5128.6 (3808.9,6546.6) | 4767456 (3534490,6091919) | 3591.2 (2681,4565.5) | -1.12 (-1.25,-0.98) |
| 35 to 54 | 820594 (629578,997005) | 1985.1 (1522.8,2410.3) | 1336173 (1032966,1614335) | 1281.1 (990.9,1546.8) | -1.44 (-1.52,-1.37) |

MHD: maternal hypertensive disorder; ASR: age-standardized rate; ASIR: age-standardized incidence rate; EAPC: estimated annual percentage change.

**Table S7.** Age-specific of the deaths cases and ASMR of MHD in 1990 and 2021, along with the percentage change in the ASR per 100,000 population and the EAPC by location.

| Location | Age groups | 1990 | | 2021 | | EAPC (95% CI) |
| --- | --- | --- | --- | --- | --- | --- |
| No (95% UI) | ASR per 100,000 (95% UI) | No (95% UI) | ASR per 100,000 (95% UI) |
| Global | 10 to 19 | 7906 (6702,9040) | 1.5 (1.3,1.7) | 4663 (3780,5843) | 0.7 (0.6,0.9) | -2.25 (-2.33,-2.17) |
| 20 to 34 | 34329 (30115,38494) | 5.2 (4.6,5.9) | 22286 (18401,26969) | 2.5 (2.1,3.1) | -2.34 (-2.44,-2.25) |
| 35 to 54 | 11659 (10025,13610) | 2.1 (1.8,2.5) | 11198 (9159,13873) | 1.2 (1,1.4) | -1.67 (-1.78,-1.57) |
| High SDI | 10 to 19 | 25 (19,32) | 0 (0,0) | 5 (4,6) | 0 (0,0) | -4.61 (-4.82,-4.41) |
| 20 to 34 | 234 (195,276) | 0.2 (0.2,0.3) | 80 (63,100) | 0.1 (0.1,0.1) | -3.03 (-3.21,-2.85) |
| 35 to 54 | 80 (64,100) | 0.1 (0.1,0.1) | 51 (39,65) | 0 (0,0) | -1.47 (-1.63,-1.32) |
| High-middle SDI | 10 to 19 | 204 (155,262) | 0.2 (0.2,0.3) | 29 (22,40) | 0 (0,0.1) | -4.64 (-4.9,-4.38) |
| 20 to 34 | 1347 (1079,1620) | 1 (0.8,1.2) | 205 (166,261) | 0.2 (0.1,0.2) | -5.57 (-5.73,-5.4) |
| 35 to 54 | 471 (359,599) | 0.4 (0.3,0.5) | 127 (101,160) | 0.1 (0.1,0.1) | -5.07 (-5.19,-4.95) |
| Middle SDI | 10 to 19 | 1322 (1111,1539) | 0.7 (0.6,0.8) | 431 (348,550) | 0.2 (0.2,0.3) | -3.2 (-3.35,-3.06) |
| 20 to 34 | 7070 (6065,8171) | 3.2 (2.7,3.7) | 2915 (2440,3528) | 1.1 (0.9,1.3) | -3.45 (-3.57,-3.33) |
| 35 to 54 | 2157 (1823,2543) | 1.2 (1,1.5) | 1615 (1343,1966) | 0.5 (0.4,0.6) | -2.72 (-2.8,-2.64) |
| Low-middle SDI | 10 to 19 | 3726 (3067,4334) | 3 (2.5,3.5) | 1461 (1170,1863) | 0.8 (0.6,1) | -4.35 (-4.44,-4.26) |
| 20 to 34 | 14806 (12538,17083) | 11 (9.3,12.6) | 8279 (6563,10391) | 3.4 (2.7,4.3) | -3.75 (-3.86,-3.64) |
| 35 to 54 | 4549 (3806,5391) | 4.4 (3.7,5.2) | 4328 (3395,5556) | 1.9 (1.5,2.5) | -2.5 (-2.6,-2.4) |
| Low SDI | 10 to 19 | 2626 (2170,3115) | 5 (4.1,5.9) | 2734 (2109,3474) | 2.1 (1.6,2.7) | -2.72 (-2.85,-2.6) |
| 20 to 34 | 10852 (9161,12451) | 19.6 (16.5,22.5) | 10789 (8720,13245) | 8.1 (6.6,9.9) | -2.74 (-2.86,-2.63) |
| 35 to 54 | 4393 (3619,5258) | 11 (9,13.2) | 5066 (4027,6382) | 5 (4,6.4) | -2.32 (-2.39,-2.24) |

MHD: maternal hypertensive disorder; ASR: age-standardized rate; ASMR: age-standardized mortality rate; EAPC: estimated annual percentage change.

**Table S8.** Age-specific of the DALYs cases and ASDR of MHD in 1990 and 2021, along with the percentage change in the ASR per 100,000 population and the EAPC by location.

| Location | Age groups | 1990 | | 2021 | | EAPC (95% CI) |
| --- | --- | --- | --- | --- | --- | --- |
| No (95% UI) | ASR per 100,000 (95% UI) | No (95% UI) | ASR per 100,000 (95% UI) |
| Global | 10 to 19 | 592969 (505771,676994) | 111.6 (95.1,127.6) | 352376 (287720,437748) | 55.7 (45.5,69.2) | -2.22 (-2.3,-2.14) |
| 20 to 34 | 2283360 (2002645,2571153) | 346.2 (303.5,389.9) | 1527849 (1273321,1827237) | 173.6 (144.6,207.6) | -2.24 (-2.33,-2.14) |
| 35 to 54 | 603556 (522273,702154) | 107.8 (93.1,125.7) | 589411 (488447,722576) | 61.6 (51.1,75.4) | -1.59 (-1.7,-1.49) |
| High SDI | 10 to 19 | 2965 (2152,4137) | 4.5 (3.3,6.3) | 572 (422,777) | 0.9 (0.7,1.3) | -4.97 (-5.08,-4.86) |
| 20 to 34 | 24689 (18483,33655) | 23.5 (17.6,32.1) | 13627 (8840,20193) | 12.8 (8.3,18.9) | -1.91 (-2.02,-1.81) |
| 35 to 54 | 5596 (4393,7309) | 4.9 (3.8,6.4) | 6292 (4416,9388) | 4.7 (3.3,7.1) | 0.12 (0.02,0.22) |
| High-middle SDI | 10 to 19 | 16329 (12649,20612) | 16.7 (12.9,21.1) | 2565 (1974,3416) | 3.6 (2.7,4.8) | -4.4 (-4.62,-4.18) |
| 20 to 34 | 97593 (77278,118926) | 71.7 (56.8,87.4) | 22536 (16574,31032) | 17.7 (13.1,24.3) | -4.25 (-4.32,-4.18) |
| 35 to 54 | 25380 (19479,32103) | 19.9 (15.2,25.3) | 9783 (7472,13033) | 5.6 (4.3,7.5) | -3.85 (-4.02,-3.68) |
| Middle SDI | 10 to 19 | 100568 (85055,117110) | 52.7 (44.5,61.5) | 33651 (27164,42743) | 18.4 (14.9,23.4) | -3.12 (-3.26,-2.98) |
| 20 to 34 | 476864 (409263,552641) | 212.8 (182.7,246.7) | 208389 (175324,251656) | 75.7 (63.7,91.5) | -3.21 (-3.32,-3.1) |
| 35 to 54 | 113335 (95936,133077) | 64.8 (54.6,76.5) | 87546 (73134,105464) | 27.6 (23.1,33.1) | -2.56 (-2.64,-2.48) |
| Low-middle SDI | 10 to 19 | 276968 (229071,320029) | 225.6 (186.7,260.5) | 110344 (88807,141455) | 58.6 (47.2,75.2) | -4.3 (-4.4,-4.2) |
| 20 to 34 | 968563 (821093,1115873) | 712.3 (603.4,820.7) | 554057 (443216,690571) | 228.7 (182.9,285) | -3.68 (-3.8,-3.57) |
| 35 to 54 | 234697 (198545,277449) | 225.7 (190.5,267.5) | 223603 (177172,283094) | 100.3 (79.4,127.1) | -2.5 (-2.59,-2.4) |
| Low SDI | 10 to 19 | 195830 (160904,233500) | 371.4 (305.8,441.9) | 205022 (160324,259649) | 159.1 (124.5,201.4) | -2.7 (-2.83,-2.58) |
| 20 to 34 | 714249 (602787,816265) | 1280.1 (1080.3,1463.7) | 727953 (596166,886610) | 542.6 (444.8,660.5) | -2.67 (-2.79,-2.55) |
| 35 to 54 | 224099 (186896,267106) | 555.1 (460.9,663.9) | 261659 (210728,325857) | 256.9 (206.1,321.4) | -2.3 (-2.37,-2.22) |

MHD: maternal hypertensive disorder; ASR: age-standardized rate; DALYs: disability-adjusted life years; ASDR: age-standardized DALYs rate; EAPC: estimated annual percentage change.

**Table S9.** Decomposition analysis for MHD burden by different regions from 1990 to 2021.

| Measures | Location | Overall difference | Aging | Percent change (%) | Population | Percent change (%) | Epidemiological change | Percent change (%) |
| --- | --- | --- | --- | --- | --- | --- | --- | --- |
| DALYs | Low SDI | 60456.32 | 13566.19 | 22.44 | 1154219 | 1909.18 | -1107329 | -1831.62 |
| Low-middle SDI | -592225 | 11684.74 | -1.97 | 781190.3 | -131.91 | -1385100 | 233.88 |
| Middle SDI | -361180 | -41162.9 | 11.4 | 180795.4 | -50.06 | -500813 | 138.66 |
| High-middle SDI | -104419 | -11156.2 | 10.68 | 10182.49 | -9.75 | -103445 | 99.07 |
| High SDI | -12759.2 | -2094.37 | 16.41 | 2666.441 | -20.9 | -13331.3 | 104.48 |
| Global | -1010248 | -187378 | 18.55 | 1190719 | -117.86 | -2013589 | 199.32 |
| Deaths | Low SDI | 717.26 | 257.816 | 35.94 | 18123.29 | 2526.74 | -17663.8 | -2462.68 |
| Low-middle SDI | -9011.55 | 490.689 | -5.45 | 12257.37 | -136.02 | -21759.6 | 241.46 |
| Middle SDI | -5587.38 | -346.137 | 6.19 | 2764.794 | -49.48 | -8006.03 | 143.29 |
| High-middle SDI | -1660.9 | -111.273 | 6.7 | 140.906 | -8.48 | -1690.53 | 101.78 |
| High SDI | -203.2 | -15.316 | 7.54 | 23.687 | -11.66 | -211.576 | 104.12 |
| Global | -15747.1 | -1939.01 | 12.31 | 18461.92 | -117.24 | -32270.1 | 204.93 |
| Incidence | Low SDI | 497576.2 | 9554.128 | 1.92 | 952463.9 | 191.42 | -464442 | -93.34 |
| Low-middle SDI | 77392.39 | 19256.59 | 24.88 | 549476.3 | 709.99 | -491341 | -634.87 |
| Middle SDI | -82641.7 | -61799.4 | 74.78 | 263132.4 | -318.4 | -283975 | 343.62 |
| High-middle SDI | -46515.4 | -41942.8 | 90.17 | 34886.12 | -75 | -39458.8 | 84.83 |
| High SDI | -2056.4 | -20752.1 | 1009.15 | 25667.46 | -1248.17 | -6971.74 | 339.03 |
| Global | 436272.7 | -173411 | -39.75 | 1270594 | 291.24 | -660911 | -151.49 |

MHD: maternal hypertensive disorder; DALYs: disability-adjusted life years.

**Table S10.** Frontier of MHD incidence and effective difference by location in 2021.

| Location | SDI | ASIR | Frontier incidence | Effective difference | ASIR rank | Effective difference rank |
| --- | --- | --- | --- | --- | --- | --- |
| Afghanistan | 0.3372 | 522.4 (405,657.1) | 325.4827 | 196.9408 | 147 | 68 |
| Albania | 0.70685 | 161.6 (117.3,212) | 39.81701 | 121.7386 | 38 | 38 |
| Algeria | 0.659501 | 391.7 (287.9,508.1) | 53.06615 | 338.6262 | 124 | 128 |
| American Samoa | 0.723728 | 594.3 (467.5,759.5) | 37.75426 | 556.5835 | 151 | 156 |
| Andorra | 0.869444 | 121.1 (89.6,161.8) | 24.36244 | 96.76788 | 24 | 31 |
| Angola | 0.453722 | 1378.6 (1138.1,1676.7) | 203.625 | 1174.984 | 183 | 189 |
| Antigua and Barbuda | 0.749887 | 223.4 (176.2,281.6) | 37.90932 | 185.4875 | 56 | 59 |
| Argentina | 0.723123 | 371.3 (286.4,486.1) | 38.10896 | 333.2005 | 120 | 127 |
| Armenia | 0.701833 | 104.5 (80.8,134.8) | 38.89617 | 65.60146 | 16 | 18 |
| Australia | 0.844253 | 209.9 (155.6,271.9) | 24.33296 | 185.5763 | 51 | 60 |
| Austria | 0.853837 | 75 (72.7,77.3) | 24.39178 | 50.56129 | 6 | 8 |
| Azerbaijan | 0.694851 | 104 (83.3,130.3) | 39.69237 | 64.29783 | 15 | 16 |
| Bahamas | 0.805021 | 245 (193.9,314) | 35.42013 | 209.5393 | 65 | 75 |
| Bahrain | 0.753043 | 276.9 (212,355.7) | 38.06949 | 238.8787 | 82 | 93 |
| Bangladesh | 0.492421 | 276 (220.8,347.1) | 147.1333 | 128.8913 | 81 | 40 |
| Barbados | 0.746749 | 257.9 (205.1,334.4) | 37.93969 | 219.9782 | 70 | 82 |
| Belarus | 0.784485 | 304.7 (225,420.5) | 39.30714 | 265.4422 | 98 | 106 |
| Belgium | 0.853654 | 280.8 (204.4,386) | 24.63734 | 256.135 | 85 | 101 |
| Belize | 0.610229 | 386.3 (306.3,501.7) | 60.41455 | 325.8443 | 122 | 125 |
| Benin | 0.373487 | 2006.7 (1709.1,2305.9) | 300.4584 | 1706.227 | 201 | 203 |
| Bermuda | 0.821365 | 292.1 (234.6,372) | 25.30019 | 266.7761 | 91 | 108 |
| Bhutan | 0.473062 | 302.3 (232.4,395.6) | 165.211 | 137.1335 | 96 | 44 |
| Bolivia (Plurinational State of) | 0.599011 | 270.8 (220.2,335.1) | 60.20205 | 210.5847 | 77 | 76 |
| Bosnia and Herzegovina | 0.723078 | 131.3 (95.6,169.8) | 38.78517 | 92.49808 | 28 | 30 |
| Botswana | 0.642722 | 704.1 (570.5,827.7) | 53.06897 | 651.0705 | 157 | 160 |
| Brazil | 0.653044 | 313.3 (268.7,372.7) | 53.0659 | 260.2111 | 103 | 103 |
| Brunei Darussalam | 0.810234 | 124.5 (97,157.9) | 33.31374 | 91.15847 | 25 | 29 |
| Bulgaria | 0.768151 | 128.1 (97.4,169) | 38.60363 | 89.53661 | 27 | 28 |
| Burkina Faso | 0.285118 | 1984.5 (1681.2,2324.6) | 506.8023 | 1477.649 | 200 | 200 |
| Burundi | 0.289374 | 1604.7 (1320.3,1899.7) | 507.6418 | 1097.018 | 196 | 184 |
| Cabo Verde | 0.533535 | 841.4 (714.8,973.1) | 104.6571 | 736.7625 | 162 | 164 |
| Cambodia | 0.473621 | 361.5 (279.1,459.4) | 165.2648 | 196.1964 | 116 | 67 |
| Cameroon | 0.479691 | 1589.5 (1387.4,1824.7) | 160.8207 | 1428.711 | 195 | 199 |
| Canada | 0.873171 | 39.2 (28.9,52.5) | 24.42043 | 14.7405 | 2 | 4 |
| Central African Republic | 0.309168 | 1214.9 (977.1,1503.7) | 413.7614 | 801.1558 | 174 | 166 |
| Chad | 0.240436 | 2138.4 (1783.7,2544.8) | 631.5312 | 1506.852 | 202 | 201 |
| Chile | 0.771515 | 418.4 (414.1,422.8) | 39.8434 | 378.5557 | 135 | 142 |
| China | 0.72163 | 110.1 (85.2,142.5) | 37.80571 | 72.31782 | 18 | 21 |
| Colombia | 0.655443 | 254.8 (216.3,303.8) | 53.42154 | 201.3805 | 66 | 72 |
| Comoros | 0.475979 | 1052.3 (891.6,1214.2) | 166.1357 | 886.1963 | 169 | 170 |
| Congo | 0.583075 | 963.7 (808.3,1136.3) | 60.95619 | 902.7596 | 165 | 171 |
| Cook Islands | 0.77911 | 348.8 (274.7,447.4) | 37.7587 | 311.0876 | 112 | 124 |
| Costa Rica | 0.70034 | 256.1 (217.3,308.6) | 38.42651 | 217.6263 | 68 | 79 |
| C么te d'Ivoire | 0.425942 | 1532.4 (1292.8,1796.2) | 224.7304 | 1307.7 | 193 | 196 |
| Croatia | 0.798341 | 102.5 (98.1,107.9) | 39.00216 | 63.51845 | 12 | 14 |
| Cuba | 0.66873 | 274.5 (214.6,365) | 53.08705 | 221.3982 | 78 | 83 |
| Cyprus | 0.835631 | 89.5 (66.3,119.5) | 24.49209 | 64.97834 | 10 | 17 |
| Czechia | 0.82845 | 242.6 (174.8,321.5) | 24.54787 | 218.0565 | 63 | 80 |
| Democratic People's Republic of Korea | 0.569855 | 77.2 (57,103.7) | 62.55828 | 14.59295 | 7 | 3 |
| Democratic Republic of the Congo | 0.38318 | 1347.7 (1108.5,1641.8) | 289.0054 | 1058.679 | 182 | 181 |
| Denmark | 0.896424 | 88.4 (66.7,113.5) | 24.7619 | 63.61774 | 9 | 15 |
| Djibouti | 0.487958 | 1284.7 (1082.9,1488.1) | 147.0412 | 1137.678 | 176 | 187 |
| Dominica | 0.746967 | 331 (265.5,424.7) | 39.48138 | 291.4954 | 107 | 117 |
| Dominican Republic | 0.619388 | 400.5 (315.2,524.7) | 60.40629 | 340.0721 | 129 | 129 |
| Ecuador | 0.661017 | 650.1 (642.9,658.3) | 53.06605 | 596.9871 | 155 | 159 |
| Egypt | 0.606787 | 468.6 (374.2,610.5) | 60.93952 | 407.6464 | 143 | 148 |
| El Salvador | 0.563775 | 255 (215.5,304.3) | 66.41688 | 188.5616 | 67 | 61 |
| Equatorial Guinea | 0.657857 | 1129.8 (980.3,1277.3) | 53.06748 | 1076.732 | 171 | 182 |
| Eritrea | 0.403864 | 1309.6 (1085.3,1552.5) | 267.9218 | 1041.694 | 179 | 180 |
| Estonia | 0.844918 | 416.1 (314.1,555.1) | 24.3942 | 391.7148 | 134 | 145 |
| Eswatini | 0.58546 | 1014.8 (858.9,1176.9) | 62.95126 | 951.8556 | 167 | 174 |
| Ethiopia | 0.358823 | 1416.2 (1201.5,1643.7) | 308.0038 | 1108.222 | 186 | 185 |
| Fiji | 0.675052 | 478 (374.2,625.6) | 53.33128 | 424.6989 | 144 | 149 |
| Finland | 0.859831 | 207.9 (150.5,276.4) | 24.62963 | 183.2742 | 48 | 57 |
| France | 0.838365 | 243.9 (177.2,327.6) | 24.33265 | 219.5374 | 64 | 81 |
| Gabon | 0.634691 | 999.6 (855.5,1151.5) | 53.10253 | 946.5153 | 166 | 173 |
| Gambia | 0.409714 | 1491 (1257.4,1727.8) | 249.3887 | 1241.599 | 191 | 193 |
| Georgia | 0.732474 | 74.6 (70.3,78.6) | 39.24351 | 35.34927 | 4 | 6 |
| Germany | 0.902957 | 303 (227.2,406.6) | 24.37414 | 278.6622 | 97 | 111 |
| Ghana | 0.56493 | 1327.7 (1139.7,1520.5) | 64.05096 | 1263.637 | 181 | 195 |
| Greece | 0.791854 | 148.2 (108.8,196.2) | 39.13233 | 109.0264 | 32 | 36 |
| Greenland | 0.82621 | 111 (83.1,151.5) | 24.89184 | 86.14859 | 19 | 27 |
| Grenada | 0.668993 | 289.5 (225.9,366.1) | 53.34007 | 236.1492 | 90 | 90 |
| Guam | 0.803982 | 617.4 (483,795) | 35.43898 | 581.9611 | 153 | 157 |
| Guatemala | 0.539972 | 156.2 (134.3,181.3) | 90.23 | 66.01075 | 35 | 19 |
| Guinea | 0.336401 | 1558.2 (1324.9,1808.5) | 327.0269 | 1231.195 | 194 | 191 |
| Guinea-Bissau | 0.35311 | 1482.5 (1254.2,1742.5) | 315.9318 | 1166.564 | 190 | 188 |
| Guyana | 0.650812 | 354.6 (279.5,449.6) | 53.06527 | 301.5066 | 114 | 120 |
| Haiti | 0.448278 | 399.6 (314,500.1) | 205.5905 | 193.9791 | 128 | 65 |
| Honduras | 0.513037 | 274.8 (234.1,330.9) | 119.2302 | 155.5847 | 79 | 50 |
| Hungary | 0.790755 | 95.9 (74.1,123.9) | 39.13133 | 56.81047 | 11 | 9 |
| Iceland | 0.876362 | 154.9 (114.4,206.3) | 24.63504 | 130.2959 | 33 | 41 |
| India | 0.575402 | 292.9 (239.9,361.4) | 63.49379 | 229.3727 | 92 | 87 |
| Indonesia | 0.656868 | 295.8 (245.6,359) | 53.07619 | 242.7074 | 93 | 95 |
| Iran (Islamic Republic of) | 0.697207 | 325 (247.2,429.1) | 37.92628 | 287.053 | 106 | 114 |
| Iraq | 0.662626 | 398 (299.2,521.4) | 53.0713 | 344.8925 | 125 | 133 |
| Ireland | 0.873754 | 128.1 (95.9,167.8) | 24.41077 | 103.7198 | 26 | 33 |
| Israel | 0.809012 | 299.3 (217.3,395.3) | 33.3796 | 265.9223 | 95 | 107 |
| Italy | 0.805774 | 107.7 (95,123.8) | 37.73386 | 69.9893 | 17 | 20 |
| Jamaica | 0.683263 | 257.3 (206,325) | 53.07899 | 204.2391 | 69 | 73 |
| Japan | 0.871242 | 217.6 (188.1,257.1) | 24.37751 | 193.1842 | 52 | 62 |
| Jordan | 0.725307 | 165.5 (127.7,220.3) | 38.73779 | 126.7893 | 39 | 39 |
| Kazakhstan | 0.725144 | 321 (249.9,420.3) | 39.16011 | 281.841 | 105 | 113 |
| Kenya | 0.523768 | 1139.9 (959.8,1327.4) | 105.2381 | 1034.68 | 172 | 178 |
| Kiribati | 0.527187 | 446.1 (341.9,578.8) | 103.0909 | 342.9771 | 139 | 130 |
| Kuwait | 0.846651 | 232.6 (182.1,298.5) | 24.39066 | 208.2571 | 57 | 74 |
| Kyrgyzstan | 0.603979 | 160.5 (121.9,207.8) | 60.24843 | 100.2841 | 37 | 32 |
| Lao People's Democratic Republic | 0.489136 | 362.6 (286,453.8) | 147.7529 | 214.8825 | 117 | 78 |
| Latvia | 0.830664 | 368.9 (275.1,492.2) | 24.69309 | 344.2087 | 118 | 132 |
| Lebanon | 0.744746 | 239.9 (180.8,311.7) | 39.25399 | 200.6768 | 62 | 71 |
| Lesotho | 0.510393 | 803.4 (664,967.6) | 125.5475 | 677.8269 | 161 | 162 |
| Liberia | 0.352442 | 1395.3 (1188.3,1612.9) | 316.2606 | 1079.007 | 185 | 183 |
| Libya | 0.725771 | 222.6 (168.3,292) | 38.48134 | 184.1285 | 55 | 58 |
| Lithuania | 0.856484 | 401.9 (298.8,532) | 24.83183 | 377.0375 | 130 | 141 |
| Luxembourg | 0.884429 | 55.2 (43.3,70.7) | 24.60906 | 30.58089 | 3 | 5 |
| Madagascar | 0.400247 | 1116.5 (919.2,1320) | 266.4652 | 850.0216 | 170 | 168 |
| Malawi | 0.384554 | 1303.4 (1089.1,1516.5) | 288.7008 | 1014.721 | 177 | 177 |
| Malaysia | 0.742524 | 388.4 (295.7,500.5) | 39.60332 | 348.7701 | 123 | 134 |
| Maldives | 0.650887 | 310.6 (234.8,403.9) | 53.06533 | 257.5655 | 102 | 102 |
| Mali | 0.26858 | 1981.7 (1667,2332.8) | 567.3413 | 1414.399 | 199 | 198 |
| Malta | 0.801585 | 191.7 (140.4,253.6) | 36.229 | 155.446 | 42 | 49 |
| Marshall Islands | 0.574091 | 352.7 (270.6,451.4) | 62.01062 | 290.6907 | 113 | 116 |
| Mauritania | 0.498945 | 1390.2 (1212.4,1558.7) | 135.6386 | 1254.55 | 184 | 194 |
| Mauritius | 0.71826 | 233.6 (179.2,301.4) | 37.76272 | 195.863 | 60 | 66 |
| Mexico | 0.664575 | 648.9 (561.6,752.5) | 53.08498 | 595.8383 | 154 | 158 |
| Micronesia (Federated States of) | 0.587535 | 427.2 (327.1,541.3) | 61.46957 | 365.7068 | 136 | 138 |
| Monaco | 0.908263 | 186.9 (135.2,251) | 24.41739 | 162.4432 | 41 | 54 |
| Mongolia | 0.617622 | 204.2 (158.3,266) | 60.60201 | 143.6276 | 47 | 45 |
| Montenegro | 0.795801 | 199.2 (143.8,264.9) | 38.35595 | 160.8511 | 45 | 53 |
| Morocco | 0.562698 | 289.1 (223.1,367.2) | 66.73627 | 222.337 | 88 | 86 |
| Mozambique | 0.326463 | 1465.5 (1221.2,1713.3) | 339.6452 | 1125.863 | 188 | 186 |
| Myanmar | 0.533901 | 309.9 (239.3,400.7) | 88.38541 | 221.5249 | 100 | 84 |
| Namibia | 0.617565 | 891.2 (728.7,1081.8) | 60.15672 | 831.0144 | 163 | 167 |
| Nauru | 0.625178 | 563.1 (442.2,728.3) | 60.77816 | 502.2861 | 150 | 152 |
| Nepal | 0.433175 | 269.4 (205.4,357.9) | 211.356 | 58.03358 | 74 | 11 |
| Netherlands | 0.888464 | 104 (76.7,138.1) | 24.64569 | 79.31656 | 14 | 25 |
| New Zealand | 0.849442 | 297.9 (251.8,358.5) | 24.39582 | 273.5399 | 94 | 110 |
| Nicaragua | 0.523958 | 269.2 (227.8,324.4) | 104.4095 | 164.7597 | 73 | 55 |
| Niger | 0.168073 | 2175.7 (1763.5,2598.5) | 1928.488 | 247.215 | 203 | 97 |
| Nigeria | 0.503391 | 1694.8 (1474.2,1919.3) | 128.8979 | 1565.891 | 197 | 202 |
| Niue | 0.726222 | 413.9 (319.7,536.7) | 37.96771 | 375.9459 | 133 | 140 |
| North Macedonia | 0.75063 | 146.1 (105.8,192.8) | 38.72129 | 107.3555 | 31 | 35 |
| Northern Mariana Islands | 0.771535 | 431.8 (339.7,562.1) | 38.09261 | 393.7208 | 137 | 146 |
| Norway | 0.916133 | 287.7 (218.5,382.9) | 24.60109 | 263.1161 | 87 | 105 |
| Oman | 0.773392 | 347.2 (265.6,451.5) | 37.75214 | 309.4788 | 111 | 123 |
| Pakistan | 0.504029 | 679.2 (552.7,842.4) | 128.7893 | 550.4574 | 156 | 154 |
| Palau | 0.754047 | 399.6 (308.9,516.8) | 38.44534 | 361.1156 | 127 | 137 |
| Palestine | 0.631012 | 286.3 (219.3,371.2) | 53.88111 | 232.4586 | 86 | 89 |
| Panama | 0.708865 | 278.3 (236.1,338.2) | 39.82743 | 238.4561 | 84 | 92 |
| Papua New Guinea | 0.417797 | 462 (366.9,593.2) | 240.2573 | 221.7805 | 141 | 85 |
| Paraguay | 0.635718 | 408.6 (322,517.3) | 53.21775 | 355.3759 | 132 | 136 |
| Peru | 0.662054 | 115.4 (97.6,137) | 53.06726 | 62.37814 | 22 | 12 |
| Philippines | 0.651219 | 451.2 (356,566.6) | 53.33854 | 397.8561 | 140 | 147 |
| Poland | 0.812043 | 119.4 (105,135.7) | 33.33376 | 86.04985 | 23 | 26 |
| Portugal | 0.744152 | 115 (111,119.1) | 37.75438 | 77.21992 | 21 | 23 |
| Puerto Rico | 0.825526 | 218.2 (170.6,284.6) | 24.33662 | 193.8758 | 53 | 64 |
| Qatar | 0.846861 | 278 (210.4,357.4) | 25.13339 | 252.8569 | 83 | 100 |
| Republic of Korea | 0.886675 | 35 (28.2,42.4) | 24.45046 | 10.53764 | 1 | 2 |
| Republic of Moldova | 0.732215 | 275.4 (205.6,370.5) | 38.23789 | 237.1243 | 80 | 91 |
| Romania | 0.768454 | 341.2 (256.4,468.2) | 38.85433 | 302.3951 | 109 | 122 |
| Russian Federation | 0.808536 | 463.1 (362.3,588.8) | 33.14604 | 429.9526 | 142 | 150 |
| Rwanda | 0.435589 | 1165.6 (982.9,1341.9) | 220.3269 | 945.2791 | 173 | 172 |
| Saint Kitts and Nevis | 0.754987 | 233.2 (185.2,304.1) | 39.905 | 193.3157 | 58 | 63 |
| Saint Lucia | 0.67251 | 233.4 (186.8,297.2) | 53.41859 | 180.0238 | 59 | 56 |
| Saint Vincent and the Grenadines | 0.637196 | 314 (246.8,402.3) | 53.16247 | 260.8769 | 104 | 104 |
| Samoa | 0.593393 | 615.5 (476.3,787.1) | 60.36539 | 555.1545 | 152 | 155 |
| San Marino | 0.888005 | 156.2 (113.3,206.9) | 24.36398 | 131.8543 | 34 | 42 |
| Sao Tome and Principe | 0.505414 | 900.7 (765,1047.3) | 129.9429 | 770.752 | 164 | 165 |
| Saudi Arabia | 0.815143 | 266.8 (204.8,340.7) | 27.00064 | 239.7669 | 72 | 94 |
| Senegal | 0.408054 | 1308.6 (1102.3,1510) | 269.9906 | 1038.612 | 178 | 179 |
| Serbia | 0.792416 | 111.7 (82,145.3) | 37.86206 | 73.82612 | 20 | 22 |
| Seychelles | 0.730151 | 382.2 (298.1,489.3) | 38.90634 | 343.2514 | 121 | 131 |
| Sierra Leone | 0.358666 | 1320 (1093.4,1555.3) | 308.1907 | 1011.809 | 180 | 176 |
| Singapore | 0.856098 | 86.9 (63.9,116.8) | 24.43014 | 62.42882 | 8 | 13 |
| Slovakia | 0.810611 | 168 (123.5,217.9) | 32.24875 | 135.7314 | 40 | 43 |
| Slovenia | 0.842431 | 269.4 (197.5,367.1) | 24.39104 | 245.036 | 75 | 96 |
| Solomon Islands | 0.42936 | 529.5 (412.1,679.7) | 227.9472 | 301.5912 | 148 | 121 |
| Somalia | 0.077688 | 1919.1 (1579,2310) | 1919.091 | 0 | 198 | 1 |
| South Africa | 0.679627 | 754.1 (640.4,871.7) | 53.10106 | 701.0231 | 160 | 163 |
| South Sudan | 0.278371 | 2337.9 (2015.4,2688.9) | 542.0375 | 1795.9 | 204 | 204 |
| Spain | 0.769284 | 198.4 (195.3,201.4) | 38.78937 | 159.563 | 44 | 52 |
| Sri Lanka | 0.701535 | 289.3 (220.2,382.1) | 37.81032 | 251.4766 | 89 | 99 |
| Sudan | 0.54195 | 356.4 (273.9,461.2) | 76.44304 | 279.9605 | 115 | 112 |
| Suriname | 0.633666 | 343.3 (272.5,433.9) | 53.39664 | 289.8756 | 110 | 115 |
| Sweden | 0.88688 | 103.9 (78.4,137.4) | 24.64419 | 79.29217 | 13 | 24 |
| Switzerland | 0.933059 | 145.7 (108.3,191.1) | 24.63406 | 121.0488 | 30 | 37 |
| Syrian Arab Republic | 0.623004 | 259.9 (196.7,338.3) | 61.17554 | 198.7586 | 71 | 70 |
| Taiwan (Province of China) | 0.874747 | 74.9 (55.1,101.1) | 24.52863 | 50.3217 | 5 | 7 |
| Tajikistan | 0.541511 | 133.9 (106.2,171.2) | 76.49889 | 57.38385 | 29 | 10 |
| Thailand | 0.682548 | 209.4 (166.1,270.6) | 53.34043 | 156.0987 | 50 | 51 |
| Timor-Leste | 0.444668 | 504.6 (388.3,638.4) | 205.141 | 299.4823 | 145 | 119 |
| Togo | 0.408534 | 1243.6 (1046.5,1444.8) | 245.7534 | 997.7967 | 175 | 175 |
| Tokelau | 0.686426 | 436.3 (332,561.3) | 53.11514 | 383.197 | 138 | 144 |
| Tonga | 0.62635 | 733.3 (567.3,956.1) | 61.0737 | 672.1866 | 158 | 161 |
| Trinidad and Tobago | 0.768763 | 333.5 (265.8,428.9) | 39.12884 | 294.3306 | 108 | 118 |
| Tunisia | 0.682432 | 196.7 (144.6,258) | 53.10252 | 143.6433 | 43 | 46 |
| T眉rkiye | 0.712693 | 270.1 (204.9,353.6) | 38.10478 | 231.9985 | 76 | 88 |
| Turkmenistan | 0.682161 | 203.1 (156.1,266.5) | 53.06604 | 150.0143 | 46 | 48 |
| Tuvalu | 0.576621 | 530.9 (409.4,674.9) | 61.97802 | 468.9344 | 149 | 151 |
| Uganda | 0.423261 | 1468.2 (1221.8,1725.1) | 233.1055 | 1235.068 | 189 | 192 |
| Ukraine | 0.760774 | 310.2 (235.1,409.3) | 37.82517 | 272.3613 | 101 | 109 |
| United Arab Emirates | 0.849318 | 237.5 (183.4,303.5) | 24.41233 | 213.1015 | 61 | 77 |
| United Kingdom | 0.859 | 222.1 (167.5,285.7) | 24.35824 | 197.6923 | 54 | 69 |
| United Republic of Tanzania | 0.446568 | 1436.9 (1210.4,1664.7) | 211.5249 | 1225.334 | 187 | 190 |
| United States of America | 0.862448 | 406.3 (349.9,476) | 24.69148 | 381.5807 | 131 | 143 |
| United States Virgin Islands | 0.821831 | 398.2 (315.3,511.5) | 25.32559 | 372.8665 | 126 | 139 |
| Uruguay | 0.719283 | 369.6 (282,487.7) | 38.09782 | 331.4671 | 119 | 126 |
| Uzbekistan | 0.662622 | 157.7 (122.3,202.9) | 53.1479 | 104.5406 | 36 | 34 |
| Vanuatu | 0.473101 | 518.9 (403.1,675) | 166.3398 | 352.5973 | 146 | 135 |
| Venezuela (Bolivarian Republic of) | 0.596513 | 308.7 (262,375.7) | 60.30796 | 248.3673 | 99 | 98 |
| Viet Nam | 0.627934 | 208.2 (159.3,271.3) | 60.16982 | 148.0573 | 49 | 47 |
| Yemen | 0.450376 | 749.8 (582,984.4) | 218.6394 | 531.1773 | 159 | 153 |
| Zambia | 0.505949 | 1510.8 (1313.5,1723.5) | 128.8843 | 1381.881 | 192 | 197 |
| Zimbabwe | 0.473819 | 1040.6 (827,1278.2) | 168.9759 | 871.6718 | 168 | 169 |

MHD: maternal hypertensive disorder; SDI: sociodemographic index; ASIR: age-standardized incidence rate.

**Table S11.** Frontier of MHD deaths and effective difference by location in 2021.

| Location | SDI | ASMR | Frontier deaths | Effective difference | ASMR rank | Effective difference rank |
| --- | --- | --- | --- | --- | --- | --- |
| Afghanistan | 0.3372 | 3.8 (2.2,5.9) | 1.050438 | 2.732719 | 189 | 184 |
| Albania | 0.70685 | 0 (0,0) | 0.006646 | 0.005686 | 36 | 23 |
| Algeria | 0.659501 | 0.3 (0.2,0.4) | 0.006925 | 0.267047 | 110 | 111 |
| American Samoa | 0.723728 | 0.7 (0.4,1.1) | 0.00665 | 0.716429 | 138 | 143 |
| Andorra | 0.869444 | 0 (0,0) | 0.003464 | 0.003302 | 9 | 11 |
| Angola | 0.453722 | 3.8 (2.2,6.4) | 0.085924 | 3.749767 | 190 | 193 |
| Antigua and Barbuda | 0.749887 | 0.1 (0.1,0.2) | 0.006685 | 0.132145 | 86 | 89 |
| Argentina | 0.723123 | 0.1 (0.1,0.2) | 0.006679 | 0.1213 | 84 | 86 |
| Armenia | 0.701833 | 0 (0,0) | 0.006674 | 0.015134 | 51 | 49 |
| Australia | 0.844253 | 0 (0,0) | 0.003407 | 0.006605 | 23 | 28 |
| Austria | 0.853837 | 0 (0,0) | 0.003411 | 0.004349 | 14 | 18 |
| Azerbaijan | 0.694851 | 0 (0,0.1) | 0.00668 | 0.039796 | 62 | 63 |
| Bahamas | 0.805021 | 0.2 (0.2,0.3) | 0.004998 | 0.235475 | 106 | 108 |
| Bahrain | 0.753043 | 0.1 (0,0.1) | 0.006653 | 0.068952 | 71 | 72 |
| Bangladesh | 0.492421 | 0.8 (0.5,1.1) | 0.055378 | 0.724893 | 144 | 144 |
| Barbados | 0.746749 | 0.1 (0.1,0.2) | 0.006677 | 0.124952 | 85 | 88 |
| Belarus | 0.784485 | 0 (0,0) | 0.005454 | 0.015641 | 50 | 51 |
| Belgium | 0.853654 | 0 (0,0) | 0.003391 | 0.005299 | 19 | 22 |
| Belize | 0.610229 | 0.4 (0.3,0.5) | 0.012011 | 0.408521 | 120 | 121 |
| Benin | 0.373487 | 2.6 (1.5,3.7) | 0.915443 | 1.652592 | 174 | 169 |
| Bermuda | 0.821365 | 0 (0,0) | 0.004336 | 0.007536 | 33 | 33 |
| Bhutan | 0.473062 | 0.7 (0.4,1.3) | 0.070026 | 0.667919 | 140 | 137 |
| Bolivia (Plurinational State of) | 0.599011 | 2.2 (1.5,3.2) | 0.013995 | 2.180819 | 171 | 178 |
| Bosnia and Herzegovina | 0.723078 | 0 (0,0) | 0.006648 | 0.007458 | 40 | 32 |
| Botswana | 0.642722 | 0.3 (0.2,0.5) | 0.007128 | 0.32354 | 116 | 117 |
| Brazil | 0.653044 | 0.3 (0.2,0.3) | 0.006958 | 0.272601 | 111 | 113 |
| Brunei Darussalam | 0.810234 | 0.1 (0.1,0.2) | 0.004297 | 0.093204 | 79 | 81 |
| Bulgaria | 0.768151 | 0 (0,0) | 0.006575 | 0.027562 | 61 | 62 |
| Burkina Faso | 0.285118 | 2.9 (1.9,4.2) | 1.297932 | 1.585909 | 176 | 166 |
| Burundi | 0.289374 | 3.7 (2.2,5.4) | 1.181993 | 2.468402 | 186 | 182 |
| Cabo Verde | 0.533535 | 0.2 (0.1,0.3) | 0.042709 | 0.160951 | 100 | 96 |
| Cambodia | 0.473621 | 0.9 (0.6,1.5) | 0.07593 | 0.834103 | 148 | 150 |
| Cameroon | 0.479691 | 2.3 (1.4,3.3) | 0.074821 | 2.209856 | 172 | 179 |
| Canada | 0.873171 | 0 (0,0) | 0.003383 | 0.015624 | 48 | 50 |
| Central African Republic | 0.309168 | 6.8 (4.1,10.5) | 1.122421 | 5.649986 | 202 | 203 |
| Chad | 0.240436 | 6.9 (4.4,10) | 2.360283 | 4.518285 | 203 | 197 |
| Chile | 0.771515 | 0.1 (0,0.1) | 0.006334 | 0.048139 | 66 | 67 |
| China | 0.72163 | 0 (0,0) | 0.006671 | 0.020842 | 57 | 59 |
| Colombia | 0.655443 | 0.2 (0.2,0.3) | 0.006939 | 0.213217 | 104 | 107 |
| Comoros | 0.475979 | 1.9 (1.1,3) | 0.068834 | 1.781318 | 164 | 171 |
| Congo | 0.583075 | 3.7 (2.1,6) | 0.017143 | 3.688115 | 187 | 191 |
| Cook Islands | 0.77911 | 0 (0,0) | 0.005353 | 0 | 5 | 1 |
| Costa Rica | 0.70034 | 0.1 (0,0.1) | 0.006671 | 0.0498 | 67 | 68 |
| C么te d'Ivoire | 0.425942 | 3.9 (2.3,6.3) | 0.13578 | 3.741714 | 191 | 192 |
| Croatia | 0.798341 | 0 (0,0) | 0.004975 | 0.003319 | 16 | 12 |
| Cuba | 0.66873 | 0.1 (0,0.1) | 0.006911 | 0.053572 | 68 | 69 |
| Cyprus | 0.835631 | 0 (0,0) | 0.004274 | 0.006036 | 24 | 24 |
| Czechia | 0.82845 | 0 (0,0) | 0.004649 | 0.002122 | 10 | 8 |
| Democratic People's Republic of Korea | 0.569855 | 0.2 (0.1,0.3) | 0.030737 | 0.121485 | 91 | 87 |
| Democratic Republic of the Congo | 0.38318 | 4.2 (2.8,6) | 0.892308 | 3.346839 | 192 | 189 |
| Denmark | 0.896424 | 0 (0,0) | 0.003452 | 0.008637 | 35 | 40 |
| Djibouti | 0.487958 | 4.8 (2.6,8.1) | 0.074997 | 4.715544 | 196 | 199 |
| Dominica | 0.746967 | 0.1 (0,0.1) | 0.006663 | 0.047729 | 65 | 66 |
| Dominican Republic | 0.619388 | 0.6 (0.5,0.9) | 0.014059 | 0.623974 | 130 | 134 |
| Ecuador | 0.661017 | 0.6 (0.5,0.9) | 0.006953 | 0.634516 | 131 | 135 |
| Egypt | 0.606787 | 0.3 (0.2,0.5) | 0.011515 | 0.330115 | 117 | 118 |
| El Salvador | 0.563775 | 0.2 (0.1,0.2) | 0.03564 | 0.115125 | 90 | 85 |
| Equatorial Guinea | 0.657857 | 3.1 (1.4,5.6) | 0.006924 | 3.109641 | 180 | 187 |
| Eritrea | 0.403864 | 3.7 (2,6) | 0.477779 | 3.242536 | 188 | 188 |
| Estonia | 0.844918 | 0 (0,0) | 0.003373 | 0.00272 | 6 | 10 |
| Eswatini | 0.58546 | 0.8 (0.3,1.5) | 0.015496 | 0.773937 | 145 | 148 |
| Ethiopia | 0.358823 | 2.2 (1.5,3) | 0.957825 | 1.223494 | 170 | 159 |
| Fiji | 0.675052 | 0.6 (0.3,1) | 0.006718 | 0.570172 | 128 | 131 |
| Finland | 0.859831 | 0 (0,0) | 0.003371 | 0.004295 | 12 | 16 |
| France | 0.838365 | 0 (0,0) | 0.003859 | 0.007914 | 32 | 36 |
| Gabon | 0.634691 | 1.3 (0.7,2.3) | 0.008036 | 1.328881 | 156 | 163 |
| Gambia | 0.409714 | 4.3 (2.5,6.7) | 0.339645 | 3.935896 | 193 | 194 |
| Georgia | 0.732474 | 0 (0,0.1) | 0.006655 | 0.042305 | 63 | 64 |
| Germany | 0.902957 | 0 (0,0) | 0.003379 | 0.008117 | 30 | 37 |
| Ghana | 0.56493 | 1.4 (0.9,1.9) | 0.02471 | 1.337032 | 157 | 164 |
| Greece | 0.791854 | 0 (0,0) | 0.005357 | 0.008378 | 39 | 39 |
| Greenland | 0.82621 | 0 (0,0) | 0.00428 | 0.012969 | 45 | 46 |
| Grenada | 0.668993 | 0.8 (0.6,1.1) | 0.006694 | 0.821945 | 146 | 149 |
| Guam | 0.803982 | 0.2 (0.1,0.3) | 0.00523 | 0.176829 | 98 | 102 |
| Guatemala | 0.539972 | 1.4 (1,1.8) | 0.040158 | 1.322481 | 158 | 161 |
| Guinea | 0.336401 | 5.8 (3.6,8.7) | 1.046855 | 4.73765 | 200 | 200 |
| Guinea-Bissau | 0.35311 | 2.8 (1.6,4.7) | 1.004742 | 1.827503 | 175 | 173 |
| Guyana | 0.650812 | 0.8 (0.5,1.1) | 0.007031 | 0.757477 | 143 | 146 |
| Haiti | 0.448278 | 6 (3.6,9.2) | 0.095609 | 5.951689 | 201 | 204 |
| Honduras | 0.513037 | 1 (0.5,1.9) | 0.048227 | 0.995677 | 150 | 155 |
| Hungary | 0.790755 | 0 (0,0) | 0.005439 | 0.010459 | 43 | 42 |
| Iceland | 0.876362 | 0 (0,0) | 0.00337 | 0.011564 | 41 | 44 |
| India | 0.575402 | 0.7 (0.6,0.9) | 0.020755 | 0.7095 | 139 | 142 |
| Indonesia | 0.656868 | 1.3 (1,1.8) | 0.006967 | 1.323964 | 155 | 162 |
| Iran (Islamic Republic of) | 0.697207 | 0 (0,0) | 0.006674 | 0.019456 | 56 | 58 |
| Iraq | 0.662626 | 0.1 (0.1,0.2) | 0.006916 | 0.133722 | 87 | 90 |
| Ireland | 0.873754 | 0 (0,0) | 0.003373 | 0.007851 | 29 | 35 |
| Israel | 0.809012 | 0 (0,0) | 0.00429 | 0.006098 | 26 | 25 |
| Italy | 0.805774 | 0 (0,0) | 0.004899 | 0.004253 | 20 | 14 |
| Jamaica | 0.683263 | 0.4 (0.2,0.6) | 0.00668 | 0.367519 | 118 | 119 |
| Japan | 0.871242 | 0 (0,0) | 0.003443 | 0.004945 | 17 | 20 |
| Jordan | 0.725307 | 0.1 (0,0.1) | 0.006687 | 0.076006 | 73 | 74 |
| Kazakhstan | 0.725144 | 0.1 (0.1,0.1) | 0.006682 | 0.080582 | 76 | 77 |
| Kenya | 0.523768 | 2.1 (1.4,3) | 0.043022 | 2.053284 | 169 | 176 |
| Kiribati | 0.527187 | 0.6 (0.4,1.1) | 0.044042 | 0.604611 | 132 | 133 |
| Kuwait | 0.846651 | 0 (0,0) | 0.003542 | 0.006218 | 21 | 26 |
| Kyrgyzstan | 0.603979 | 0.3 (0.2,0.4) | 0.012594 | 0.267249 | 112 | 112 |
| Lao People's Democratic Republic | 0.489136 | 0.6 (0.3,1.2) | 0.06689 | 0.566352 | 129 | 130 |
| Latvia | 0.830664 | 0 (0,0) | 0.004346 | 0.001977 | 8 | 7 |
| Lebanon | 0.744746 | 0 (0,0.1) | 0.006672 | 0.026229 | 60 | 61 |
| Lesotho | 0.510393 | 1.9 (1.1,3) | 0.049907 | 1.81682 | 165 | 172 |
| Liberia | 0.352442 | 1.8 (1.1,2.7) | 1.007308 | 0.764652 | 163 | 147 |
| Libya | 0.725771 | 0.2 (0.1,0.3) | 0.00669 | 0.174491 | 97 | 100 |
| Lithuania | 0.856484 | 0 (0,0) | 0.003416 | 0.006367 | 22 | 27 |
| Luxembourg | 0.884429 | 0 (0,0) | 0.003393 | 0.010286 | 38 | 41 |
| Madagascar | 0.400247 | 3.5 (2.3,5) | 0.827606 | 2.676757 | 184 | 183 |
| Malawi | 0.384554 | 3.2 (2,4.8) | 0.904474 | 2.280955 | 183 | 180 |
| Malaysia | 0.742524 | 0.2 (0.1,0.2) | 0.006651 | 0.151853 | 92 | 93 |
| Maldives | 0.650887 | 0.1 (0.1,0.1) | 0.007032 | 0.076716 | 74 | 75 |
| Mali | 0.26858 | 2.9 (2.1,4.1) | 2.323682 | 0.589724 | 178 | 132 |
| Malta | 0.801585 | 0 (0,0) | 0.005363 | 0.016525 | 52 | 52 |
| Marshall Islands | 0.574091 | 0.4 (0.2,0.8) | 0.02119 | 0.416558 | 122 | 122 |
| Mauritania | 0.498945 | 3 (1.6,5) | 0.060593 | 2.9052 | 179 | 186 |
| Mauritius | 0.71826 | 0.1 (0.1,0.2) | 0.006691 | 0.139456 | 89 | 92 |
| Mexico | 0.664575 | 0.2 (0.2,0.3) | 0.00686 | 0.199432 | 101 | 103 |
| Micronesia (Federated States of) | 0.587535 | 0.2 (0.1,0.4) | 0.015666 | 0.210678 | 105 | 105 |
| Monaco | 0.908263 | 0 (0,0) | 0.003373 | 0.017165 | 49 | 55 |
| Mongolia | 0.617622 | 0.2 (0.1,0.2) | 0.011175 | 0.154691 | 94 | 95 |
| Montenegro | 0.795801 | 0 (0,0) | 0.004959 | 0 | 4 | 2 |
| Morocco | 0.562698 | 0.5 (0.3,0.9) | 0.037743 | 0.480771 | 126 | 126 |
| Mozambique | 0.326463 | 3.1 (1.8,5) | 1.052686 | 2.080714 | 181 | 177 |
| Myanmar | 0.533901 | 1.1 (0.7,1.5) | 0.041839 | 1.048747 | 152 | 157 |
| Namibia | 0.617565 | 0.8 (0.4,1.5) | 0.012546 | 0.745234 | 141 | 145 |
| Nauru | 0.625178 | 1.6 (0.9,2.8) | 0.009618 | 1.602687 | 160 | 168 |
| Nepal | 0.433175 | 0.7 (0.4,1.2) | 0.216878 | 0.489859 | 136 | 127 |
| Netherlands | 0.888464 | 0 (0,0) | 0.003411 | 0.014595 | 46 | 48 |
| New Zealand | 0.849442 | 0 (0,0) | 0.003373 | 0.005127 | 18 | 21 |
| Nicaragua | 0.523958 | 0.3 (0.2,0.3) | 0.043013 | 0.212514 | 108 | 106 |
| Niger | 0.168073 | 5 (3.1,7.5) | 3.189463 | 1.829371 | 199 | 174 |
| Nigeria | 0.503391 | 4.8 (3.1,7.3) | 0.051741 | 4.778793 | 197 | 201 |
| Niue | 0.726222 | 0.3 (0.2,0.4) | 0.006685 | 0.277652 | 113 | 114 |
| North Macedonia | 0.75063 | 0 (0,0) | 0.006692 | 0.017579 | 55 | 56 |
| Northern Mariana Islands | 0.771535 | 0.2 (0.1,0.3) | 0.005956 | 0.202792 | 102 | 104 |
| Norway | 0.916133 | 0 (0,0) | 0.003374 | 0.004342 | 13 | 17 |
| Oman | 0.773392 | 0.1 (0.1,0.2) | 0.006182 | 0.112931 | 83 | 84 |
| Pakistan | 0.504029 | 4.4 (2.4,7.1) | 0.059996 | 4.355041 | 195 | 196 |
| Palau | 0.754047 | 0.3 (0.2,0.5) | 0.006691 | 0.293921 | 114 | 115 |
| Palestine | 0.631012 | 0.1 (0,0.1) | 0.009617 | 0.055218 | 70 | 70 |
| Panama | 0.708865 | 0.2 (0.2,0.3) | 0.006678 | 0.241008 | 107 | 109 |
| Papua New Guinea | 0.417797 | 1.2 (0.8,1.7) | 0.139273 | 1.024347 | 154 | 156 |
| Paraguay | 0.635718 | 0.5 (0.3,0.7) | 0.014628 | 0.500357 | 125 | 128 |
| Peru | 0.662054 | 0.7 (0.4,1.1) | 0.006873 | 0.692761 | 135 | 140 |
| Philippines | 0.651219 | 0.9 (0.7,1.2) | 0.007031 | 0.890173 | 147 | 151 |
| Poland | 0.812043 | 0 (0,0) | 0.004267 | 4.22E-05 | 3 | 4 |
| Portugal | 0.744152 | 0 (0,0) | 0.006688 | 0.010498 | 44 | 43 |
| Puerto Rico | 0.825526 | 0.1 (0.1,0.1) | 0.004727 | 0.086603 | 78 | 79 |
| Qatar | 0.846861 | 0 (0,0) | 0.003376 | 0.006995 | 25 | 30 |
| Republic of Korea | 0.886675 | 0 (0,0) | 0.003533 | 0.008373 | 34 | 38 |
| Republic of Moldova | 0.732215 | 0 (0,0) | 0.006665 | 0.006857 | 37 | 29 |
| Romania | 0.768454 | 0 (0,0) | 0.006554 | 0.024523 | 59 | 60 |
| Russian Federation | 0.808536 | 0 (0,0) | 0.004822 | 0.013373 | 47 | 47 |
| Rwanda | 0.435589 | 4.9 (3.1,7.1) | 0.107605 | 4.794977 | 198 | 202 |
| Saint Kitts and Nevis | 0.754987 | 1.1 (0.9,1.5) | 0.006679 | 1.135436 | 153 | 158 |
| Saint Lucia | 0.67251 | 0.2 (0.1,0.2) | 0.006694 | 0.1523 | 93 | 94 |
| Saint Vincent and the Grenadines | 0.637196 | 0.5 (0.4,0.6) | 0.009566 | 0.465533 | 124 | 125 |
| Samoa | 0.593393 | 0.2 (0.1,0.3) | 0.014674 | 0.167894 | 99 | 97 |
| San Marino | 0.888005 | 0 (0,0) | 0.003397 | 0.002706 | 7 | 9 |
| Sao Tome and Principe | 0.505414 | 0.6 (0.3,1) | 0.05315 | 0.518129 | 127 | 129 |
| Saudi Arabia | 0.815143 | 0.1 (0.1,0.2) | 0.004293 | 0.096823 | 81 | 82 |
| Senegal | 0.408054 | 2.9 (1.9,4.3) | 0.157177 | 2.738051 | 177 | 185 |
| Serbia | 0.792416 | 0 (0,0) | 0.005353 | 0.017162 | 53 | 54 |
| Seychelles | 0.730151 | 0.9 (0.6,1.4) | 0.006655 | 0.942019 | 149 | 152 |
| Sierra Leone | 0.358666 | 1.9 (1.1,2.9) | 0.963394 | 0.951012 | 167 | 153 |
| Singapore | 0.856098 | 0 (0,0) | 0.003504 | 0.000293 | 2 | 6 |
| Slovakia | 0.810611 | 0 (0,0) | 0.004453 | 0.007283 | 31 | 31 |
| Slovenia | 0.842431 | 0 (0,0) | 0.003404 | 0.000183 | 1 | 5 |
| Solomon Islands | 0.42936 | 1.9 (1.2,2.9) | 0.123829 | 1.777761 | 166 | 170 |
| Somalia | 0.077688 | 3.2 (2,4.8) | 3.176359 | 0 | 182 | 3 |
| South Africa | 0.679627 | 0.7 (0.5,0.9) | 0.006671 | 0.708126 | 137 | 141 |
| South Sudan | 0.278371 | 6.9 (4.1,11.3) | 2.264856 | 4.683568 | 204 | 198 |
| Spain | 0.769284 | 0 (0,0) | 0.006268 | 0.004274 | 27 | 15 |
| Sri Lanka | 0.701535 | 0.1 (0.1,0.1) | 0.006701 | 0.08278 | 77 | 78 |
| Sudan | 0.54195 | 1.6 (0.8,2.7) | 0.039487 | 1.586657 | 162 | 167 |
| Suriname | 0.633666 | 0.7 (0.4,1.1) | 0.008006 | 0.690638 | 134 | 139 |
| Sweden | 0.88688 | 0 (0,0) | 0.00353 | 0.011718 | 42 | 45 |
| Switzerland | 0.933059 | 0 (0,0) | 0.003423 | 0.004141 | 11 | 13 |
| Syrian Arab Republic | 0.623004 | 0.1 (0.1,0.2) | 0.010428 | 0.089536 | 80 | 80 |
| Taiwan (Province of China) | 0.874747 | 0 (0,0) | 0.003479 | 0.007649 | 28 | 34 |
| Tajikistan | 0.541511 | 0.2 (0.1,0.3) | 0.039764 | 0.175301 | 103 | 101 |
| Thailand | 0.682548 | 0.1 (0.1,0.2) | 0.006669 | 0.112104 | 82 | 83 |
| Timor-Leste | 0.444668 | 1.1 (0.6,1.7) | 0.101821 | 0.965944 | 151 | 154 |
| Togo | 0.408534 | 1.5 (0.8,2.4) | 0.182247 | 1.30875 | 159 | 160 |
| Tokelau | 0.686426 | 0.3 (0.2,0.5) | 0.006669 | 0.296902 | 115 | 116 |
| Tonga | 0.62635 | 0.3 (0.1,0.4) | 0.009079 | 0.255267 | 109 | 110 |
| Trinidad and Tobago | 0.768763 | 0.4 (0.3,0.6) | 0.006254 | 0.435808 | 123 | 124 |
| Tunisia | 0.682432 | 0.1 (0.1,0.3) | 0.006674 | 0.138187 | 88 | 91 |
| T眉rkiye | 0.712693 | 0.1 (0,0.1) | 0.00667 | 0.07059 | 72 | 73 |
| Turkmenistan | 0.682161 | 0.4 (0.3,0.6) | 0.006695 | 0.417946 | 121 | 123 |
| Tuvalu | 0.576621 | 0.4 (0.2,0.7) | 0.02103 | 0.377981 | 119 | 120 |
| Uganda | 0.423261 | 3.6 (2.2,5.2) | 0.233645 | 3.364142 | 185 | 190 |
| Ukraine | 0.760774 | 0 (0,0) | 0.006651 | 0.016965 | 54 | 53 |
| United Arab Emirates | 0.849318 | 0.1 (0,0.1) | 0.003404 | 0.060972 | 69 | 71 |
| United Kingdom | 0.859 | 0 (0,0) | 0.003396 | 0.004821 | 15 | 19 |
| United Republic of Tanzania | 0.446568 | 4.3 (2.9,6) | 0.10209 | 4.185854 | 194 | 195 |
| United States of America | 0.862448 | 0.1 (0,0.1) | 0.003398 | 0.047658 | 64 | 65 |
| United States Virgin Islands | 0.821831 | 0.2 (0.1,0.3) | 0.004346 | 0.168186 | 95 | 98 |
| Uruguay | 0.719283 | 0.1 (0.1,0.1) | 0.006681 | 0.079977 | 75 | 76 |
| Uzbekistan | 0.662622 | 0.2 (0.1,0.2) | 0.006874 | 0.16839 | 96 | 99 |
| Vanuatu | 0.473101 | 0.8 (0.4,1.3) | 0.069441 | 0.690147 | 142 | 138 |
| Venezuela (Bolivarian Republic of) | 0.596513 | 0.7 (0.5,0.9) | 0.014482 | 0.662253 | 133 | 136 |
| Viet Nam | 0.627934 | 0 (0,0) | 0.010692 | 0.017682 | 58 | 57 |
| Yemen | 0.450376 | 1.6 (0.9,2.8) | 0.110956 | 1.509711 | 161 | 165 |
| Zambia | 0.505949 | 2 (1.2,3.1) | 0.048024 | 1.972667 | 168 | 175 |
| Zimbabwe | 0.473819 | 2.5 (1.5,4) | 0.074171 | 2.455703 | 173 | 181 |

MHD: maternal hypertensive disorder; SDI: sociodemographic index; ASMR: age-standardized mortality rate.

**Table S12.** Frontier of MHD DALYs and effective difference by location in 2021.

| Location | SDI | ASDR | Frontier DALYs | Effective difference | ASDR rank | Effective difference rank |
| --- | --- | --- | --- | --- | --- | --- |
| Afghanistan | 0.3372 | 229.6 (140.4,354.8) | 77.27493 | 152.3325 | 188 | 183 |
| Albania | 0.70685 | 2.5 (1.4,4) | 2.07511 | 0.435882 | 27 | 13 |
| Algeria | 0.659501 | 20.6 (13.7,29) | 2.824291 | 17.77999 | 110 | 112 |
| American Samoa | 0.723728 | 47.5 (29.5,72.1) | 1.823756 | 45.69433 | 138 | 142 |
| Andorra | 0.869444 | 1.7 (0.9,2.8) | 1.17421 | 0.531815 | 12 | 16 |
| Angola | 0.453722 | 230.3 (138.6,367) | 8.482846 | 221.8153 | 189 | 192 |
| Antigua and Barbuda | 0.749887 | 10.9 (9.1,13.4) | 1.454551 | 9.440691 | 87 | 92 |
| Argentina | 0.723123 | 11.9 (8.8,15.9) | 1.739633 | 10.18596 | 91 | 96 |
| Armenia | 0.701833 | 2.4 (1.7,3.2) | 2.204375 | 0.198356 | 24 | 7 |
| Australia | 0.844253 | 2.8 (1.7,4.5) | 1.284912 | 1.529355 | 32 | 34 |
| Austria | 0.853837 | 1.3 (0.8,1.8) | 1.258225 | 0.010276 | 3 | 4 |
| Azerbaijan | 0.694851 | 3.9 (2.7,5.3) | 2.176419 | 1.6994 | 49 | 38 |
| Bahamas | 0.805021 | 17.1 (12.8,22.4) | 1.464832 | 15.65264 | 102 | 109 |
| Bahrain | 0.753043 | 7.4 (5,10.7) | 1.471366 | 5.975108 | 72 | 77 |
| Bangladesh | 0.492421 | 50.7 (33.6,71.5) | 6.742439 | 43.98135 | 143 | 141 |
| Barbados | 0.746749 | 10.6 (8.2,14.2) | 1.472988 | 9.154127 | 84 | 89 |
| Belarus | 0.784485 | 4.8 (3,7.4) | 1.456309 | 3.325575 | 57 | 60 |
| Belgium | 0.853654 | 3.7 (2.1,6.4) | 1.251358 | 2.414284 | 47 | 49 |
| Belize | 0.610229 | 29.3 (23.7,36) | 3.633695 | 25.70679 | 121 | 122 |
| Benin | 0.373487 | 174.5 (112.3,252.5) | 64.90274 | 109.606 | 174 | 171 |
| Bermuda | 0.821365 | 3.6 (2.2,5.9) | 1.323531 | 2.279216 | 45 | 47 |
| Bhutan | 0.473062 | 48.4 (25.5,81.3) | 7.79019 | 40.59947 | 140 | 136 |
| Bolivia (Plurinational State of) | 0.599011 | 129 (89.9,185.3) | 4.047282 | 124.9711 | 168 | 178 |
| Bosnia and Herzegovina | 0.723078 | 2.3 (1.4,3.4) | 1.625936 | 0.666665 | 21 | 18 |
| Botswana | 0.642722 | 28.2 (18.4,38.8) | 3.419596 | 24.74674 | 119 | 120 |
| Brazil | 0.653044 | 19.9 (17,23) | 3.239166 | 16.70105 | 109 | 111 |
| Brunei Darussalam | 0.810234 | 6.6 (4.2,10) | 1.464393 | 5.148677 | 69 | 71 |
| Bulgaria | 0.768151 | 3.5 (2.6,4.7) | 1.455872 | 2.018419 | 42 | 43 |
| Burkina Faso | 0.285118 | 193 (129.4,274) | 104.5997 | 88.35738 | 181 | 164 |
| Burundi | 0.289374 | 225.6 (144.6,327.4) | 90.05999 | 135.5473 | 187 | 180 |
| Cabo Verde | 0.533535 | 20.7 (13.8,30.1) | 5.247628 | 15.44826 | 111 | 108 |
| Cambodia | 0.473621 | 56.3 (35.4,88.7) | 7.167374 | 49.17374 | 147 | 147 |
| Cameroon | 0.479691 | 157.1 (105.1,220) | 7.14834 | 149.9159 | 172 | 181 |
| Canada | 0.873171 | 1.5 (1.1,2) | 1.036602 | 0.43854 | 6 | 14 |
| Central African Republic | 0.309168 | 407 (253.6,622.9) | 80.30435 | 326.7285 | 202 | 203 |
| Chad | 0.240436 | 447.1 (297.4,639.9) | 158.0434 | 289.0465 | 204 | 199 |
| Chile | 0.771515 | 7.9 (5.8,10.5) | 1.454678 | 6.466902 | 75 | 80 |
| China | 0.72163 | 2.8 (2.1,3.9) | 1.842322 | 1.001152 | 33 | 23 |
| Colombia | 0.655443 | 15.5 (11.6,20.3) | 2.998874 | 12.49492 | 99 | 100 |
| Comoros | 0.475979 | 116.2 (72.6,179.9) | 7.563006 | 108.6702 | 163 | 170 |
| Congo | 0.583075 | 223.7 (133,358) | 4.078423 | 219.5969 | 186 | 191 |
| Cook Islands | 0.77911 | 4 (2.2,6.8) | 1.464738 | 2.54081 | 53 | 53 |
| Costa Rica | 0.70034 | 5.3 (4.1,6.8) | 2.178952 | 3.126705 | 62 | 58 |
| C么te d'Ivoire | 0.425942 | 244.4 (148.1,387.6) | 16.54992 | 227.8626 | 191 | 193 |
| Croatia | 0.798341 | 1.6 (1.1,2.3) | 1.457946 | 0.134181 | 10 | 6 |
| Cuba | 0.66873 | 6.4 (4.7,8.6) | 2.534099 | 3.830716 | 64 | 63 |
| Cyprus | 0.835631 | 1.5 (0.9,2.3) | 1.306512 | 0.204265 | 8 | 8 |
| Czechia | 0.82845 | 3.1 (1.8,5.2) | 1.319023 | 1.823483 | 36 | 39 |
| Democratic People's Republic of Korea | 0.569855 | 10 (5.6,17) | 4.085279 | 5.888943 | 83 | 75 |
| Democratic Republic of the Congo | 0.38318 | 261.3 (172.8,362.8) | 62.13923 | 199.1717 | 192 | 188 |
| Denmark | 0.896424 | 1.6 (1.1,2.3) | 0.976884 | 0.607582 | 9 | 17 |
| Djibouti | 0.487958 | 302.4 (166.7,502.7) | 6.731937 | 295.6678 | 198 | 201 |
| Dominica | 0.746967 | 6.6 (4.2,9.3) | 1.459522 | 5.123053 | 68 | 70 |
| Dominican Republic | 0.619388 | 42.8 (32,56.6) | 3.542621 | 39.2833 | 131 | 133 |
| Ecuador | 0.661017 | 44.7 (33.7,58.6) | 2.708916 | 42.01314 | 134 | 139 |
| Egypt | 0.606787 | 25.3 (17.4,34.9) | 3.615462 | 21.64491 | 117 | 117 |
| El Salvador | 0.563775 | 11 (7.6,15.1) | 4.117096 | 6.910859 | 89 | 82 |
| Equatorial Guinea | 0.657857 | 187.4 (89.6,332.1) | 2.915096 | 184.497 | 178 | 187 |
| Eritrea | 0.403864 | 241.9 (141.6,379.5) | 41.54557 | 200.3856 | 190 | 189 |
| Estonia | 0.844918 | 5.2 (2.8,8.7) | 1.284222 | 3.870956 | 59 | 64 |
| Eswatini | 0.58546 | 54.9 (27.9,93.4) | 4.239792 | 50.66601 | 146 | 148 |
| Ethiopia | 0.358823 | 137.1 (94.2,182.7) | 66.25454 | 70.80128 | 171 | 158 |
| Fiji | 0.675052 | 37.5 (22.7,58.1) | 2.48616 | 34.97059 | 127 | 130 |
| Finland | 0.859831 | 2.8 (1.5,4.5) | 1.186828 | 1.590364 | 31 | 35 |
| France | 0.838365 | 3.4 (2,5.6) | 1.303094 | 2.065303 | 40 | 45 |
| Gabon | 0.634691 | 89.9 (51,150.7) | 3.544912 | 86.37532 | 157 | 163 |
| Gambia | 0.409714 | 264.8 (163.9,405.3) | 14.31106 | 250.4547 | 194 | 194 |
| Georgia | 0.732474 | 3.6 (2.8,4.4) | 1.518816 | 2.031882 | 44 | 44 |
| Germany | 0.902957 | 3.9 (2.3,6.6) | 0.997935 | 2.934104 | 51 | 55 |
| Ghana | 0.56493 | 96.2 (68.1,134.5) | 4.104434 | 92.10141 | 159 | 166 |
| Greece | 0.791854 | 2.4 (1.5,3.6) | 1.472968 | 0.904403 | 22 | 21 |
| Greenland | 0.82621 | 2.2 (1.4,3.2) | 1.300742 | 0.903541 | 19 | 20 |
| Grenada | 0.668993 | 53.7 (41.6,67.7) | 2.65644 | 51.02449 | 145 | 149 |
| Guam | 0.803982 | 16.5 (11.6,22.6) | 1.464726 | 15.00216 | 101 | 106 |
| Guatemala | 0.539972 | 80.3 (60.4,103.1) | 4.913968 | 75.35462 | 155 | 161 |
| Guinea | 0.336401 | 358.9 (225.2,537.3) | 78.81545 | 280.1072 | 201 | 198 |
| Guinea-Bissau | 0.35311 | 186.1 (113.7,298) | 63.08645 | 123.0108 | 176 | 175 |
| Guyana | 0.650812 | 50.6 (34.5,70.1) | 3.280831 | 47.27851 | 142 | 145 |
| Haiti | 0.448278 | 353.8 (214.4,532.6) | 9.071922 | 344.6905 | 200 | 204 |
| Honduras | 0.513037 | 63 (32.2,111.4) | 5.655353 | 57.30443 | 150 | 154 |
| Hungary | 0.790755 | 1.9 (1.4,2.6) | 1.464696 | 0.462917 | 13 | 15 |
| Iceland | 0.876362 | 2.5 (1.6,3.8) | 1.034161 | 1.441161 | 26 | 33 |
| India | 0.575402 | 45.6 (36.9,55.9) | 4.091725 | 41.4875 | 136 | 138 |
| Indonesia | 0.656868 | 81.8 (62.5,111.5) | 2.833781 | 78.92416 | 156 | 162 |
| Iran (Islamic Republic of) | 0.697207 | 5.2 (3.3,7.9) | 2.179666 | 3.020026 | 60 | 56 |
| Iraq | 0.662626 | 12.1 (7.8,18.1) | 2.673423 | 9.404245 | 92 | 91 |
| Ireland | 0.873754 | 1.9 (1.3,2.9) | 1.030489 | 0.912426 | 14 | 22 |
| Israel | 0.809012 | 3.9 (2.1,6.3) | 1.464691 | 2.440207 | 50 | 51 |
| Italy | 0.805774 | 1.7 (1.1,2.3) | 1.454741 | 0.204828 | 11 | 9 |
| Jamaica | 0.683263 | 25.3 (17.5,36.4) | 2.498137 | 22.75839 | 116 | 118 |
| Japan | 0.871242 | 2.4 (1.6,3.6) | 1.071674 | 1.327097 | 23 | 32 |
| Jordan | 0.725307 | 6.5 (4.1,9.5) | 1.658027 | 4.800865 | 66 | 67 |
| Kazakhstan | 0.725144 | 8.7 (6.5,11.7) | 1.65339 | 7.040191 | 80 | 83 |
| Kenya | 0.523768 | 129.4 (86.2,181.5) | 5.393312 | 124.0241 | 169 | 176 |
| Kiribati | 0.527187 | 42.6 (25.6,67.4) | 5.23851 | 37.38217 | 130 | 132 |
| Kuwait | 0.846651 | 3.1 (1.9,5.1) | 1.263368 | 1.885269 | 37 | 40 |
| Kyrgyzstan | 0.603979 | 18.5 (14.5,23.6) | 3.845548 | 14.63554 | 108 | 104 |
| Lao People's Democratic Republic | 0.489136 | 41.1 (21.6,73.3) | 6.848564 | 34.29836 | 129 | 129 |
| Latvia | 0.830664 | 4.6 (2.6,7.9) | 1.301601 | 3.316342 | 56 | 59 |
| Lebanon | 0.744746 | 4.6 (2.9,6.8) | 1.531851 | 3.063057 | 55 | 57 |
| Lesotho | 0.510393 | 118 (71.6,183.6) | 5.624404 | 112.3527 | 164 | 173 |
| Liberia | 0.352442 | 126.4 (80.3,187) | 73.90463 | 52.45919 | 167 | 150 |
| Libya | 0.725771 | 12.4 (7.4,19.4) | 1.736524 | 10.70793 | 95 | 97 |
| Lithuania | 0.856484 | 5.2 (3,8.7) | 1.226417 | 3.982681 | 61 | 65 |
| Luxembourg | 0.884429 | 1.3 (1,1.7) | 1.012647 | 0.312413 | 4 | 10 |
| Madagascar | 0.400247 | 216.3 (146.4,301.4) | 62.05272 | 154.2703 | 184 | 184 |
| Malawi | 0.384554 | 187.5 (121.9,276.9) | 63.2909 | 124.2197 | 179 | 177 |
| Malaysia | 0.742524 | 13.1 (9.7,17.2) | 1.490516 | 11.56837 | 96 | 98 |
| Maldives | 0.650887 | 8.3 (5.6,11.7) | 3.27592 | 5.028693 | 76 | 69 |
| Mali | 0.26858 | 201.4 (147.3,273.4) | 154.6324 | 46.72751 | 182 | 144 |
| Malta | 0.801585 | 3.4 (2.3,5.1) | 1.459822 | 1.909705 | 41 | 41 |
| Marshall Islands | 0.574091 | 31.3 (18.1,51.4) | 4.076943 | 27.20978 | 123 | 123 |
| Mauritania | 0.498945 | 186.4 (104.3,299.7) | 5.905622 | 180.5408 | 177 | 186 |
| Mauritius | 0.71826 | 11 (8.9,13.4) | 1.890785 | 9.070984 | 88 | 88 |
| Mexico | 0.664575 | 18.4 (14,23.3) | 2.656978 | 15.78882 | 107 | 110 |
| Micronesia (Federated States of) | 0.587535 | 18.4 (11.3,28.8) | 4.10929 | 14.27211 | 106 | 103 |
| Monaco | 0.908263 | 3.2 (1.9,5) | 0.956978 | 2.277197 | 38 | 46 |
| Mongolia | 0.617622 | 11.9 (8.2,16.8) | 3.546293 | 8.305417 | 90 | 87 |
| Montenegro | 0.795801 | 2.5 (1.3,4.2) | 1.45848 | 1.010063 | 25 | 24 |
| Morocco | 0.562698 | 32.5 (18.7,53.3) | 4.085388 | 28.43098 | 125 | 124 |
| Mozambique | 0.326463 | 192.1 (118.5,295.2) | 77.91701 | 114.2028 | 180 | 174 |
| Myanmar | 0.533901 | 68.7 (46.9,95.1) | 5.04437 | 63.68811 | 152 | 157 |
| Namibia | 0.617565 | 52.7 (29.6,96.2) | 3.584152 | 49.08042 | 144 | 146 |
| Nauru | 0.625178 | 97.2 (53.7,166.6) | 3.525302 | 93.69594 | 160 | 167 |
| Nepal | 0.433175 | 45.5 (26,76.2) | 11.37761 | 34.09895 | 135 | 128 |
| Netherlands | 0.888464 | 2.2 (1.5,3.1) | 0.958024 | 1.195851 | 18 | 30 |
| New Zealand | 0.849442 | 3.7 (2.3,5.9) | 1.253832 | 2.488533 | 48 | 52 |
| Nicaragua | 0.523958 | 17.5 (13.4,22.2) | 5.269181 | 12.2542 | 104 | 99 |
| Niger | 0.168073 | 322.7 (199.6,472.1) | 216.7007 | 105.9768 | 199 | 169 |
| Nigeria | 0.503391 | 300.8 (198.8,447) | 5.847897 | 294.9836 | 197 | 200 |
| Niue | 0.726222 | 22 (14.2,32.5) | 1.665463 | 20.32251 | 112 | 114 |
| North Macedonia | 0.75063 | 3.1 (2,4.7) | 1.455407 | 1.654147 | 35 | 36 |
| Northern Mariana Islands | 0.771535 | 16.5 (10.6,24) | 1.465114 | 14.99068 | 100 | 105 |
| Norway | 0.916133 | 3.5 (2,5.8) | 0.918967 | 2.596963 | 43 | 54 |
| Oman | 0.773392 | 10.7 (6.9,16.1) | 1.465844 | 9.27328 | 85 | 90 |
| Pakistan | 0.504029 | 267.8 (151.1,427.9) | 6.04695 | 261.7708 | 195 | 196 |
| Palau | 0.754047 | 22.7 (14.6,34.9) | 1.467758 | 21.25378 | 113 | 116 |
| Palestine | 0.631012 | 6.9 (4.6,9.8) | 3.458893 | 3.421017 | 70 | 61 |
| Panama | 0.708865 | 17.2 (13.1,21.6) | 2.109 | 15.10067 | 103 | 107 |
| Papua New Guinea | 0.417797 | 75.2 (50.2,105.6) | 17.03662 | 58.17561 | 154 | 155 |
| Paraguay | 0.635718 | 34.8 (24.6,49.2) | 3.518626 | 31.29237 | 126 | 127 |
| Peru | 0.662054 | 43 (27.7,64.2) | 2.673299 | 40.3718 | 132 | 135 |
| Philippines | 0.651219 | 57.4 (43.3,77.9) | 3.267805 | 54.10843 | 148 | 151 |
| Poland | 0.812043 | 1.5 (0.9,2.3) | 1.393791 | 0.106806 | 7 | 5 |
| Portugal | 0.744152 | 2.3 (1.6,3.1) | 1.454572 | 0.799264 | 20 | 19 |
| Puerto Rico | 0.825526 | 7.7 (5.8,10.2) | 1.30146 | 6.374347 | 74 | 78 |
| Qatar | 0.846861 | 3.6 (2.2,5.9) | 1.264143 | 2.367119 | 46 | 48 |
| Republic of Korea | 0.886675 | 0.9 (0.6,1.2) | 0.918806 | 0 | 1 | 1 |
| Republic of Moldova | 0.732215 | 4 (2.4,6.5) | 1.594329 | 2.438397 | 54 | 50 |
| Romania | 0.768454 | 5.8 (3.9,8.8) | 1.470449 | 4.304869 | 63 | 66 |
| Russian Federation | 0.808536 | 6.4 (3.9,10.1) | 1.472692 | 4.901981 | 65 | 68 |
| Rwanda | 0.435589 | 288.6 (187.9,409.9) | 9.865081 | 278.7705 | 196 | 197 |
| Saint Kitts and Nevis | 0.754987 | 73.5 (56.5,93.7) | 1.461868 | 72.01445 | 153 | 159 |
| Saint Lucia | 0.67251 | 12.2 (9.5,15.7) | 2.639551 | 9.528594 | 94 | 94 |
| Saint Vincent and the Grenadines | 0.637196 | 32.5 (26,40.9) | 3.419604 | 29.09318 | 124 | 126 |
| Samoa | 0.593393 | 17.5 (11.2,27.2) | 3.684116 | 13.84568 | 105 | 102 |
| San Marino | 0.888005 | 2 (1.1,3.4) | 0.993632 | 1.054384 | 17 | 25 |
| Sao Tome and Principe | 0.505414 | 41 (23.9,66.8) | 5.841861 | 35.19657 | 128 | 131 |
| Saudi Arabia | 0.815143 | 8.6 (5.7,13) | 1.423829 | 7.207441 | 78 | 84 |
| Senegal | 0.408054 | 185.3 (123.8,270.7) | 20.20643 | 165.0755 | 175 | 185 |
| Serbia | 0.792416 | 2.5 (1.7,3.6) | 1.459508 | 1.089478 | 28 | 28 |
| Seychelles | 0.730151 | 58.8 (39.2,83.2) | 1.549701 | 57.29138 | 149 | 153 |
| Sierra Leone | 0.358666 | 124.3 (79.1,182.8) | 62.15822 | 62.11046 | 166 | 156 |
| Singapore | 0.856098 | 1.2 (0.7,2) | 1.179937 | 0 | 2 | 2 |
| Slovakia | 0.810611 | 2.6 (1.6,4.1) | 1.454794 | 1.13081 | 29 | 29 |
| Slovenia | 0.842431 | 3.2 (1.8,5.6) | 1.290928 | 1.950519 | 39 | 42 |
| Solomon Islands | 0.42936 | 121.3 (77.1,179) | 10.9616 | 110.3678 | 165 | 172 |
| Somalia | 0.077688 | 202.5 (132.4,290.1) | 202.5182 | 0 | 183 | 3 |
| South Africa | 0.679627 | 48.8 (37.3,61) | 2.567099 | 46.27345 | 141 | 143 |
| South Sudan | 0.278371 | 428.1 (260.7,684.3) | 104.0334 | 324.0352 | 203 | 202 |
| Spain | 0.769284 | 2.7 (1.8,3.9) | 1.465092 | 1.220848 | 30 | 31 |
| Sri Lanka | 0.701535 | 8.6 (5.9,12.4) | 2.176504 | 6.412624 | 77 | 79 |
| Sudan | 0.54195 | 95.3 (49.2,158.4) | 4.104629 | 91.23875 | 158 | 165 |
| Suriname | 0.633666 | 46.5 (29.5,69.5) | 3.503189 | 42.99097 | 137 | 140 |
| Sweden | 0.88688 | 2 (1.5,2.9) | 0.968364 | 1.073161 | 16 | 27 |
| Switzerland | 0.933059 | 2 (1.2,3.2) | 0.956898 | 1.058477 | 15 | 26 |
| Syrian Arab Republic | 0.623004 | 8.7 (5.3,13.3) | 3.488328 | 5.173399 | 79 | 72 |
| Taiwan (Province of China) | 0.874747 | 1.5 (1,2.1) | 1.046382 | 0.411449 | 5 | 12 |
| Tajikistan | 0.541511 | 14.2 (9.5,20.8) | 4.06929 | 10.14822 | 97 | 95 |
| Thailand | 0.682548 | 9.2 (6.2,13.5) | 2.491852 | 6.732331 | 81 | 81 |
| Timor-Leste | 0.444668 | 64 (40.2,99) | 9.084529 | 54.96092 | 151 | 152 |
| Togo | 0.408534 | 100.2 (59.5,156.3) | 25.66705 | 74.52481 | 161 | 160 |
| Tokelau | 0.686426 | 23.2 (15.1,35.1) | 2.256205 | 20.91376 | 115 | 115 |
| Tonga | 0.62635 | 23.2 (15.1,33.7) | 3.459444 | 19.69823 | 114 | 113 |
| Trinidad and Tobago | 0.768763 | 30 (22.1,40.7) | 1.456947 | 28.50349 | 122 | 125 |
| Tunisia | 0.682432 | 10.8 (6.3,17.5) | 2.494058 | 8.284219 | 86 | 86 |
| T眉rkiye | 0.712693 | 7.6 (5.1,10.8) | 1.890487 | 5.704981 | 73 | 74 |
| Turkmenistan | 0.682161 | 27.3 (19.6,39.3) | 2.515691 | 24.80194 | 118 | 121 |
| Tuvalu | 0.576621 | 28.6 (16.9,45.5) | 4.211842 | 24.34542 | 120 | 119 |
| Uganda | 0.423261 | 216.3 (137.8,310.9) | 15.32468 | 201.0097 | 185 | 190 |
| Ukraine | 0.760774 | 5 (3.1,7.8) | 1.465015 | 3.553524 | 58 | 62 |
| United Arab Emirates | 0.849318 | 6.5 (4.3,9.4) | 1.24615 | 5.243581 | 67 | 73 |
| United Kingdom | 0.859 | 2.9 (1.7,4.6) | 1.196162 | 1.666871 | 34 | 37 |
| United Republic of Tanzania | 0.446568 | 263.2 (179.2,365.9) | 9.077661 | 254.0901 | 193 | 195 |
| United States of America | 0.862448 | 7.1 (5.1,9.6) | 1.180138 | 5.949629 | 71 | 76 |
| United States Virgin Islands | 0.821831 | 14.3 (9.7,20.8) | 1.381728 | 12.91928 | 98 | 101 |
| Uruguay | 0.719283 | 9.3 (7,12.8) | 1.845247 | 7.486077 | 82 | 85 |
| Uzbekistan | 0.662622 | 12.1 (9.1,15.9) | 2.647451 | 9.485225 | 93 | 93 |
| Vanuatu | 0.473101 | 47.6 (28.9,77.1) | 7.614175 | 40.02313 | 139 | 134 |
| Venezuela (Bolivarian Republic of) | 0.596513 | 44.3 (32.1,60) | 3.647756 | 40.693 | 133 | 137 |
| Viet Nam | 0.627934 | 3.9 (2.4,6) | 3.565938 | 0.379971 | 52 | 11 |
| Yemen | 0.450376 | 106.4 (61.7,176.2) | 9.147363 | 97.22835 | 162 | 168 |
| Zambia | 0.505949 | 136.6 (83.9,203) | 5.690434 | 130.8602 | 170 | 179 |
| Zimbabwe | 0.473819 | 158.2 (97.3,244.1) | 7.247806 | 150.9147 | 173 | 182 |

MHD: maternal hypertensive disorder; SDI: sociodemographic index; DALYs: disability-adjusted life years; ASDR: age-standardized DALYs rate.


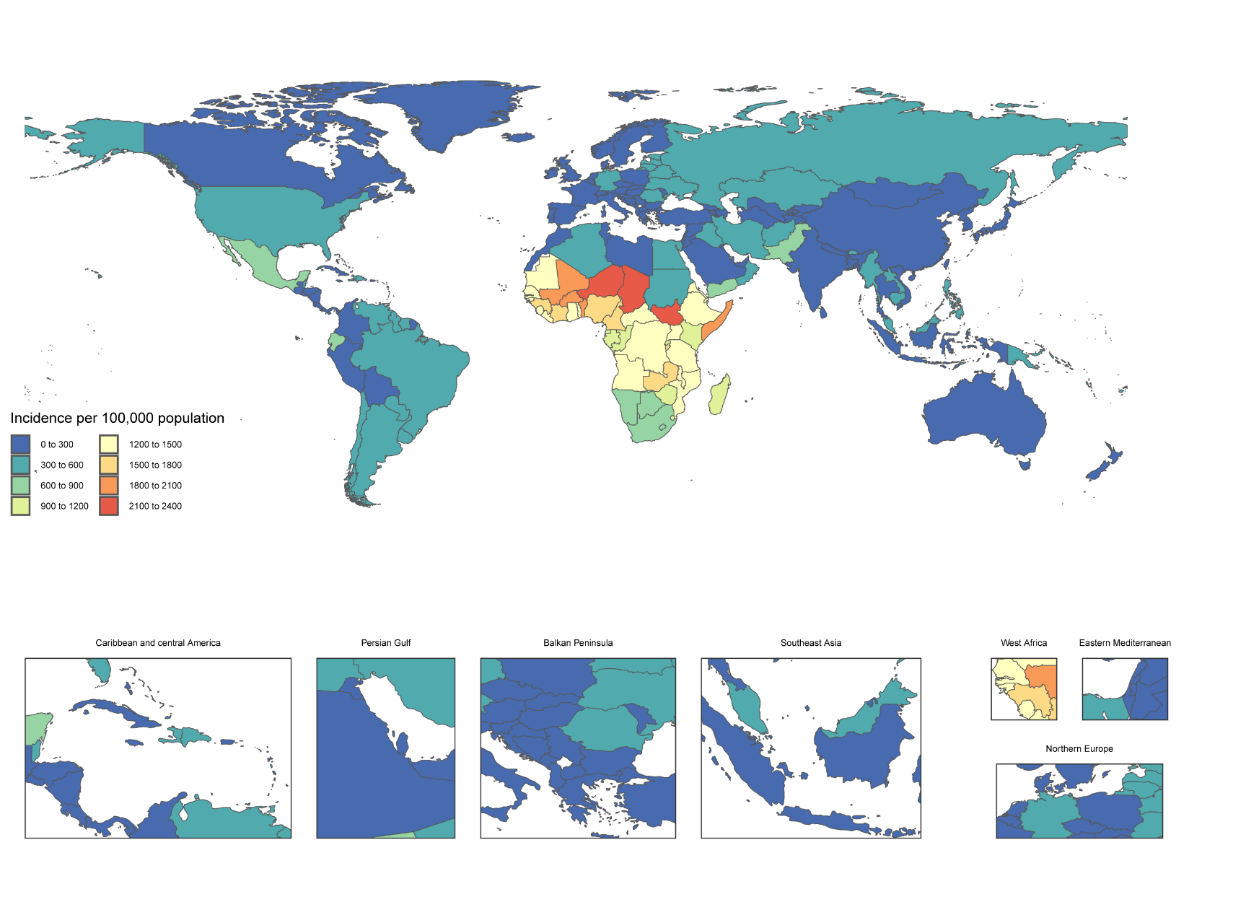


**Figure S1.** Age-standardized incidence rate of MHD in 2021 by country and territory. MHD: maternal hypertensive disorder. MHD: maternal hypertensive disorder.


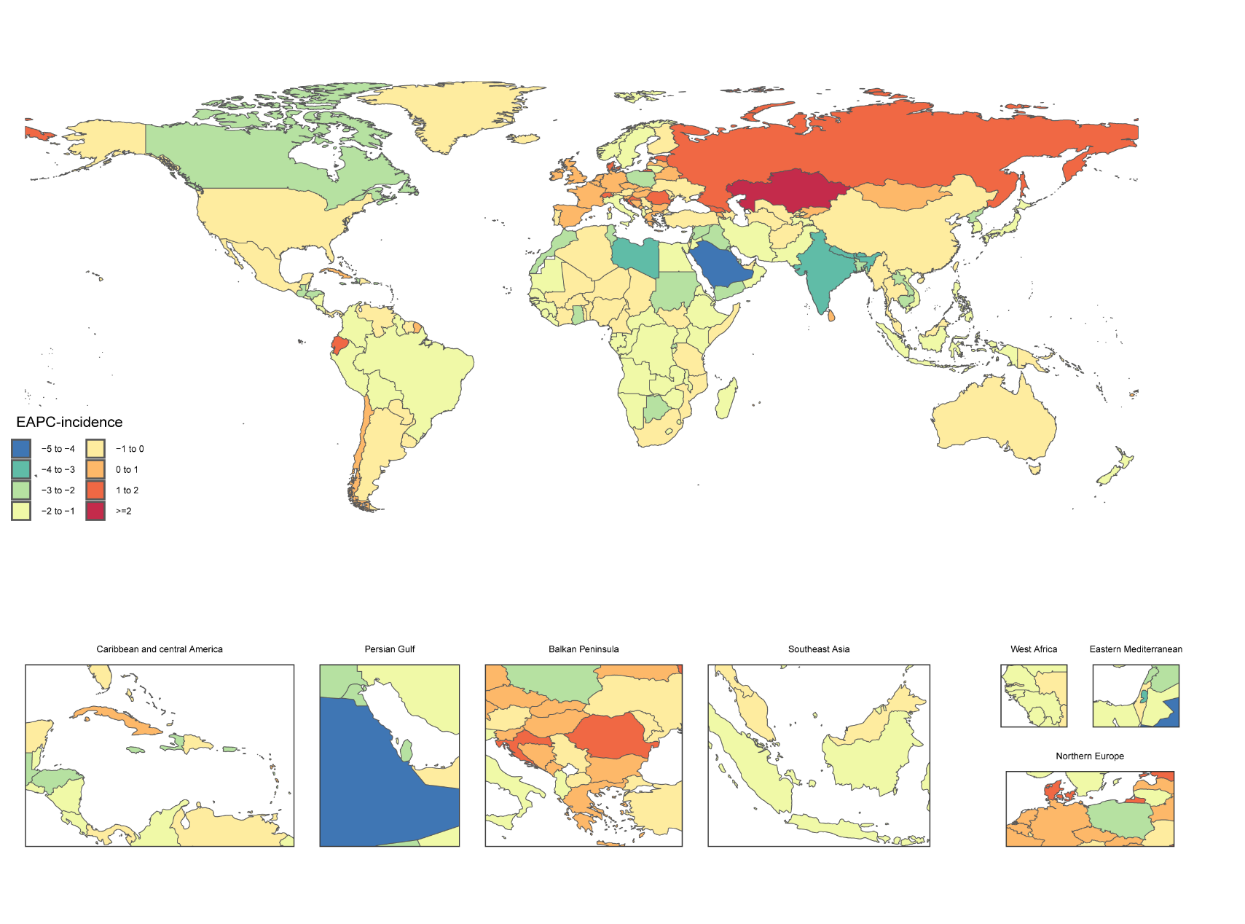


**Figure S2.** EAPC in incidence of MHD by country and territory from 1990 to 2021. MHD: maternal hypertensive disorder; EAPC: estimated annual percentage change.


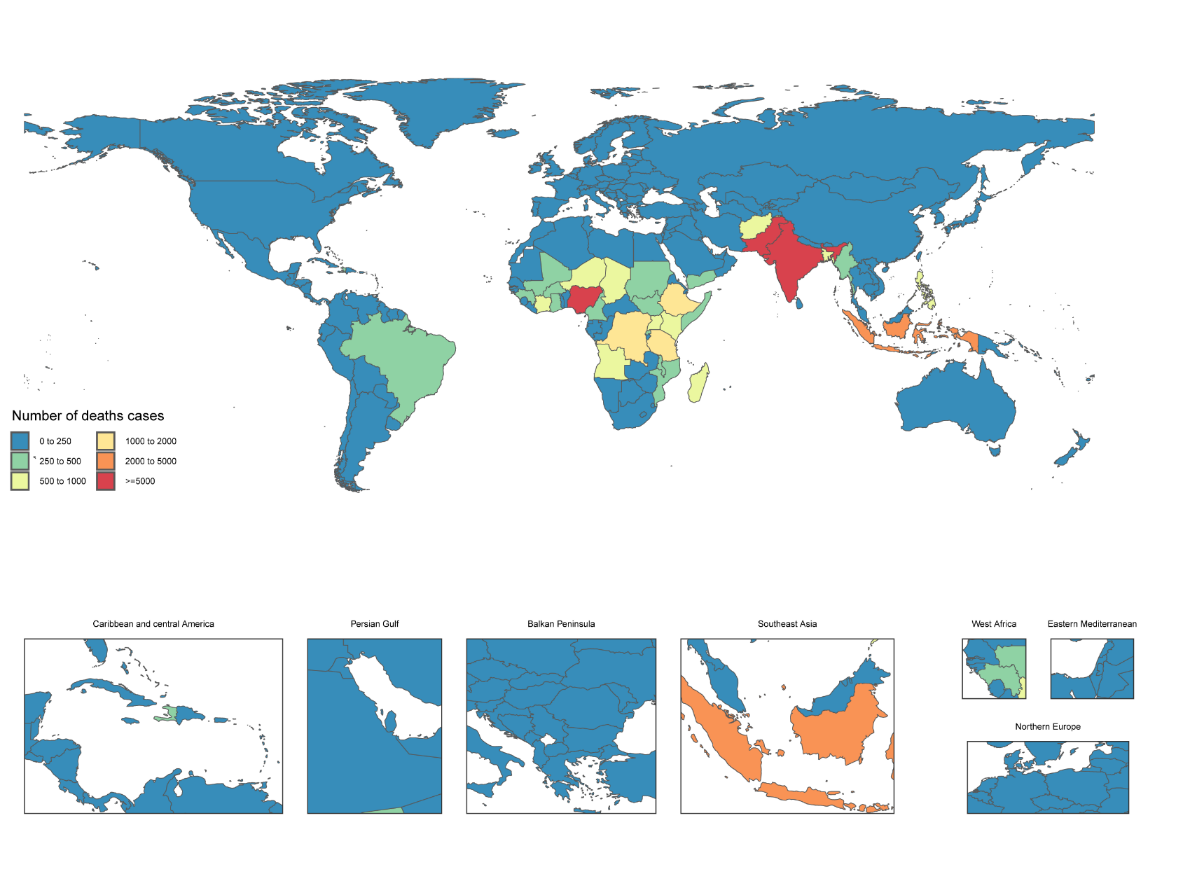


**Figure S3.** Number of deaths cases of MHD in 2021 by country and territory. MHD: maternal hypertensive disorder.


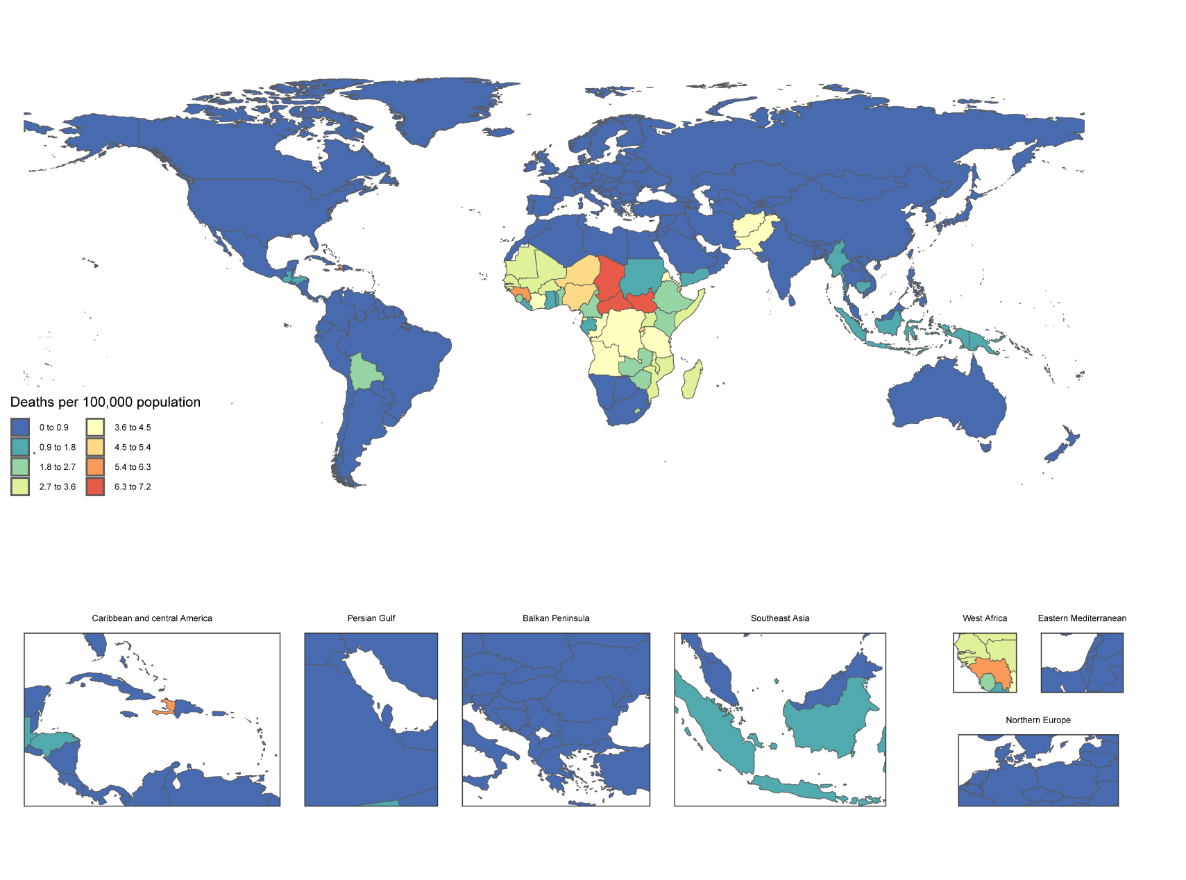


**Figure S4.** Age-standardized deaths rate of MHD in 2021 by country and territory. MHD: maternal hypertensive disorder.


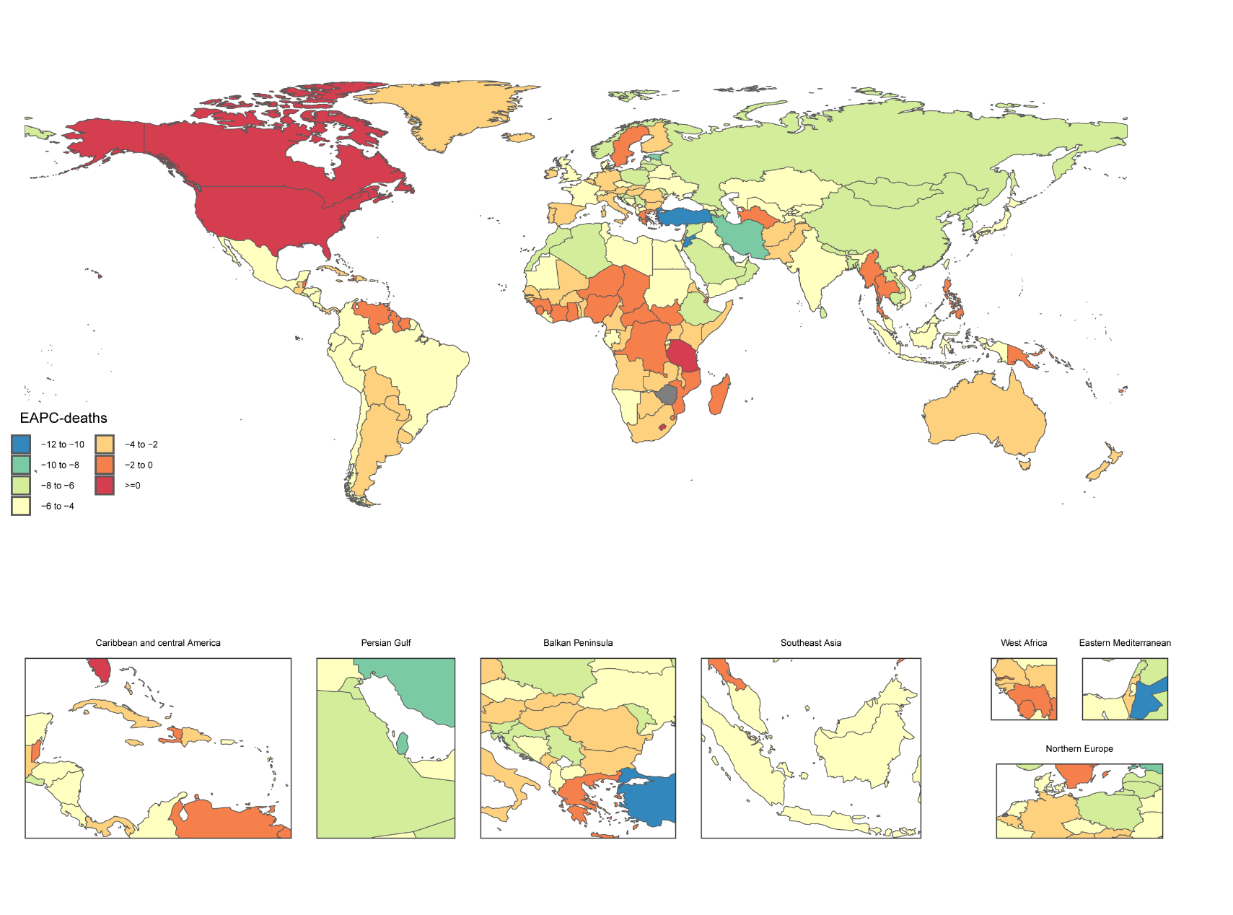


**Figure S5.** EAPC in deaths of MHD by country and territory from 1990 to 2021. MHD: maternal hypertensive disorder; EAPC: estimated annual percentage change.


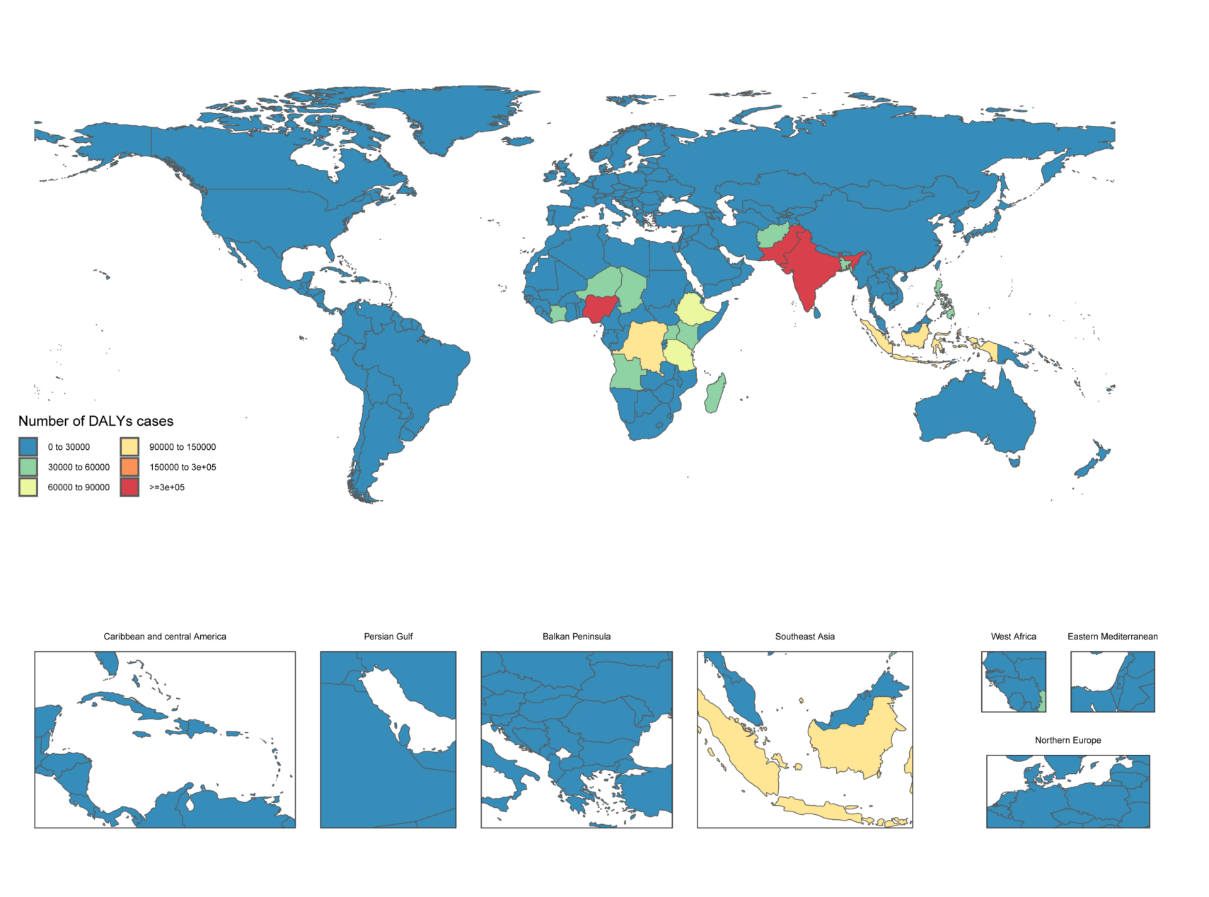


**Figure S6.** Number of DALYs cases of MHD in 2021 by country and territory. MHD: maternal hypertensive disorder; DALYs: disability-adjusted life years.


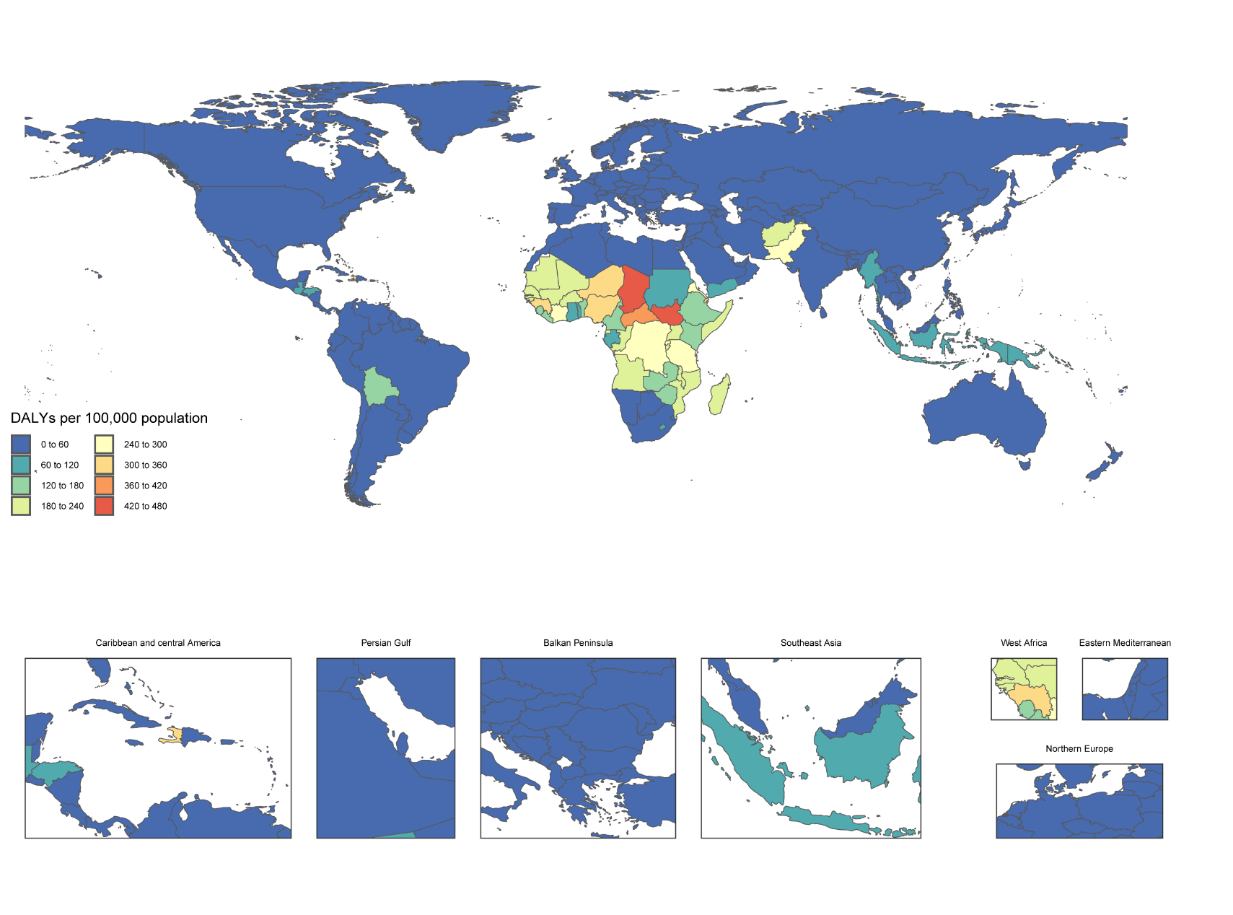


**Figure S7.** Age-standardized DALYs rate of MHD in 2021 by country and territory. MHD: maternal hypertensive disorder; DALYS: disability-adjusted life years.


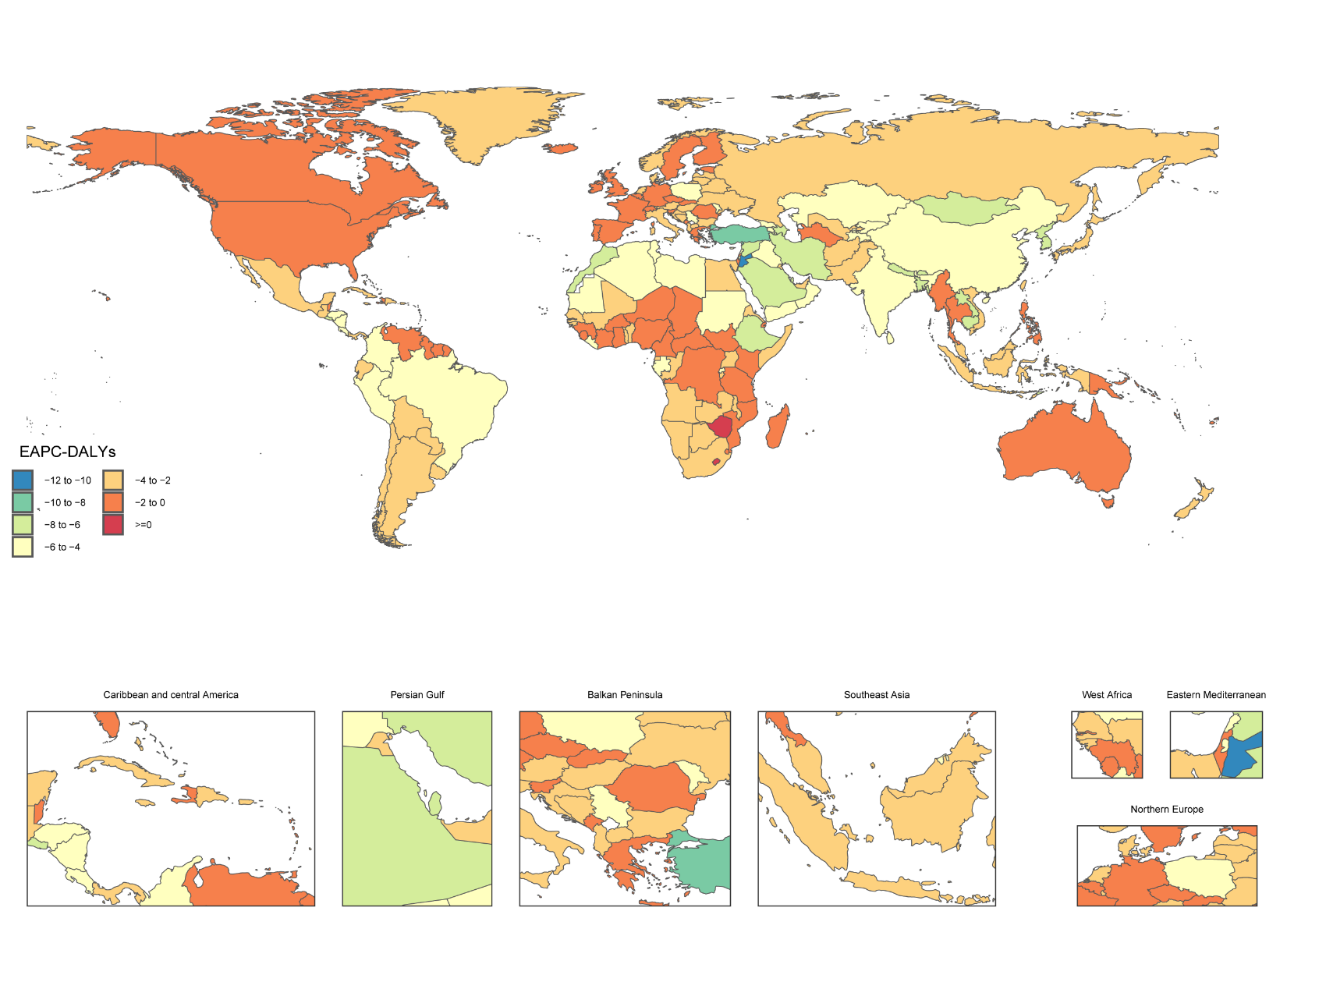


**Figure S8.** EAPC in DALYs of MHD by country and territory from 1990 to 2021. MHD: maternal hypertensive disorder; EAPC: estimated annual percentage change; DALYs: disability-adjusted life years.


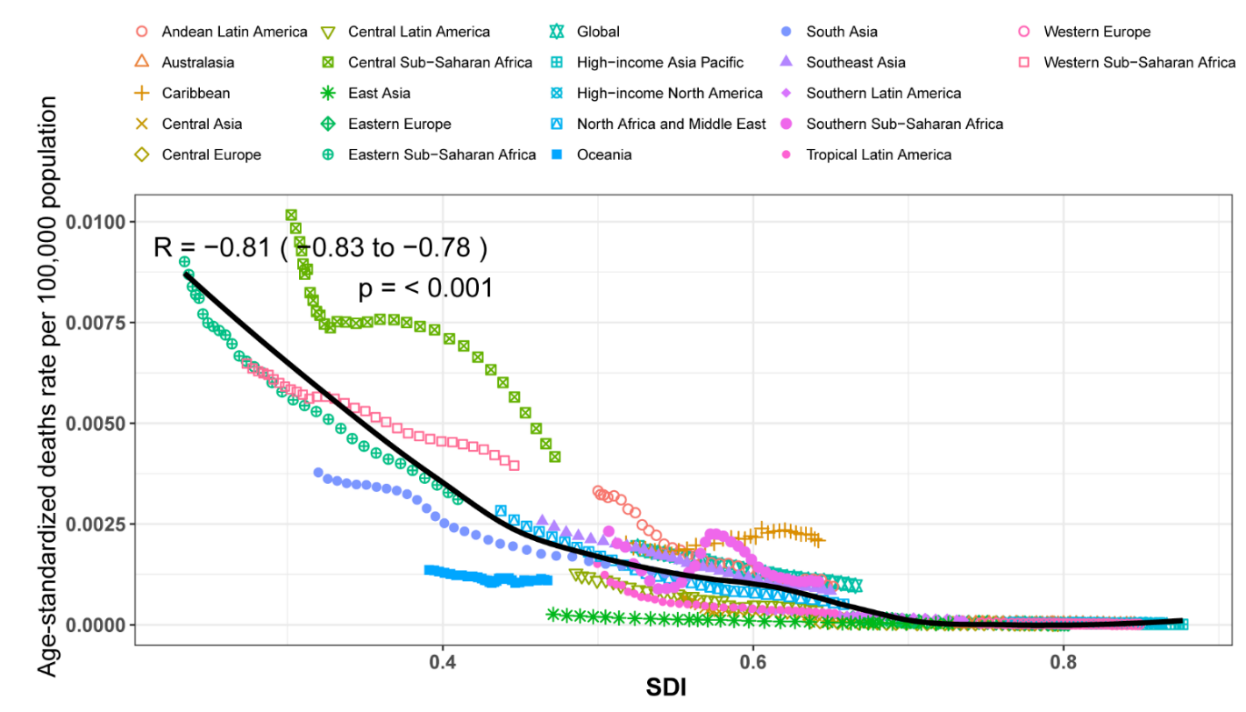


**Figure S9.** Age-standardized deaths rate for MHD for Global Burden of Disease regions by SDI from 1990–2021. MHD: maternal hypertensive disorder; SDI: sociodemographic index.


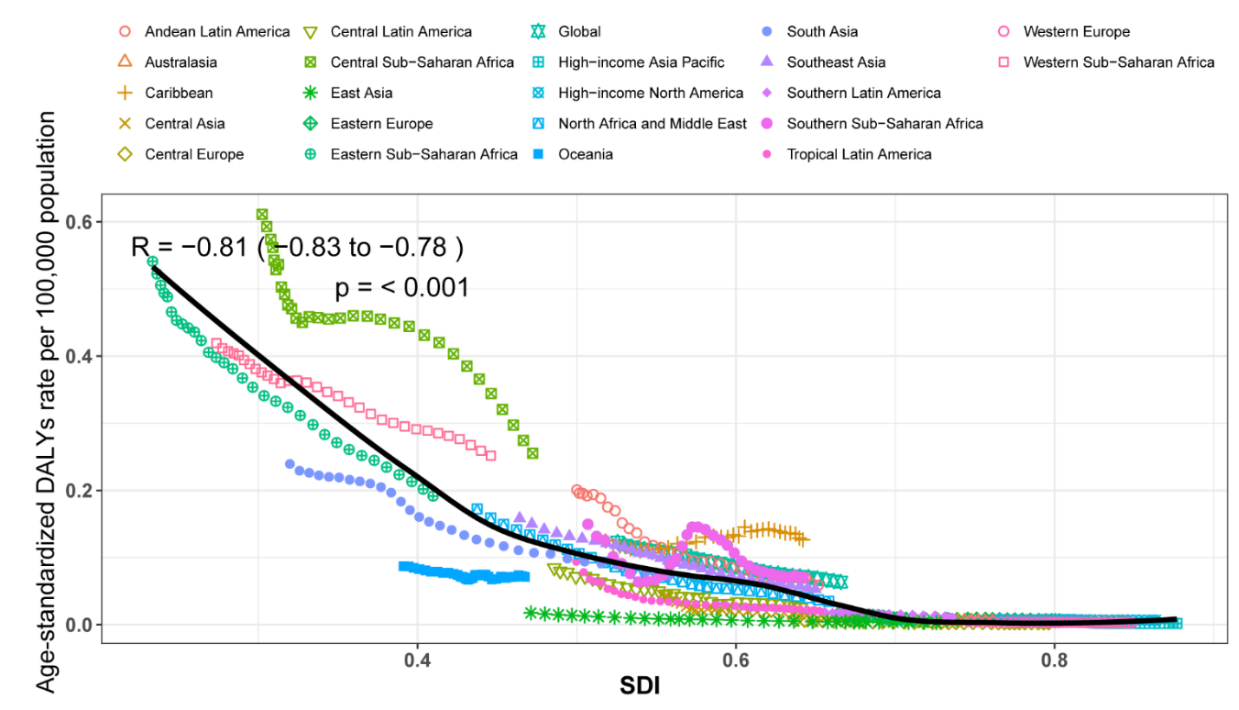


**Figure S10.** Age-standardized DALYs rate for MHD for Global Burden of Disease regions by SDI from 1990–2021. DALYs: disability-adjusted life years; MHD: maternal hypertensive disorder; SDI: sociodemographic index.


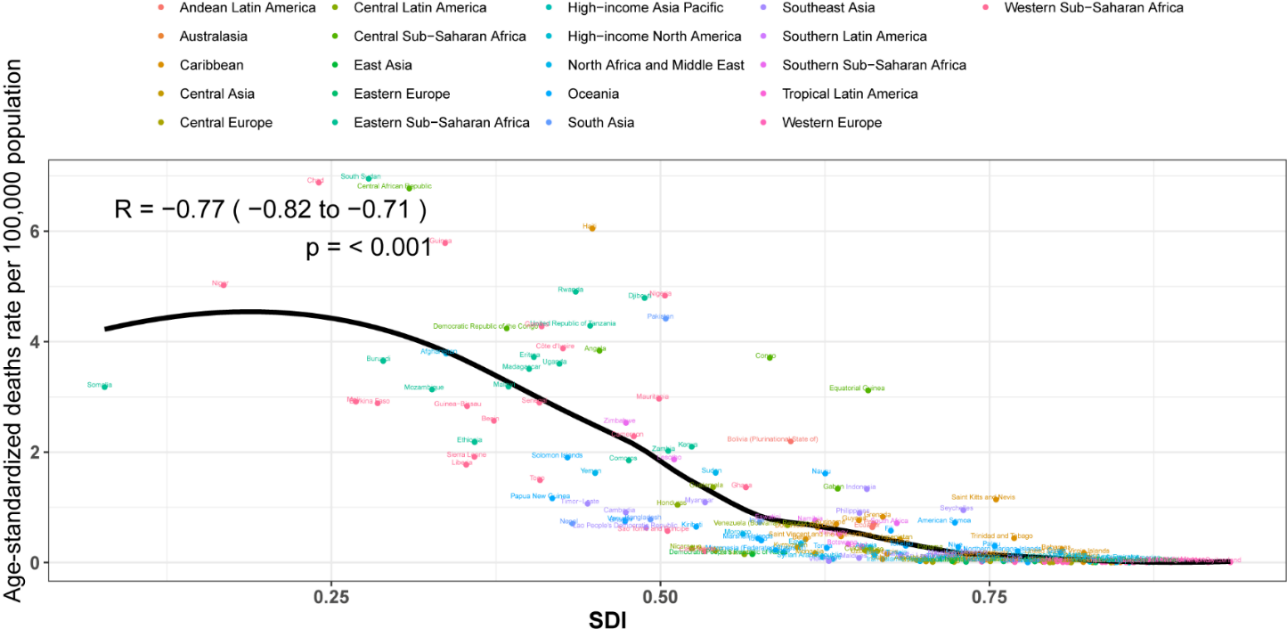


**Figure S11.** Age-standardized deaths rate of MHD for 204 countries and territories by SDI in 2021. MHD: maternal hypertensive disorder; SDI: sociodemographic index.


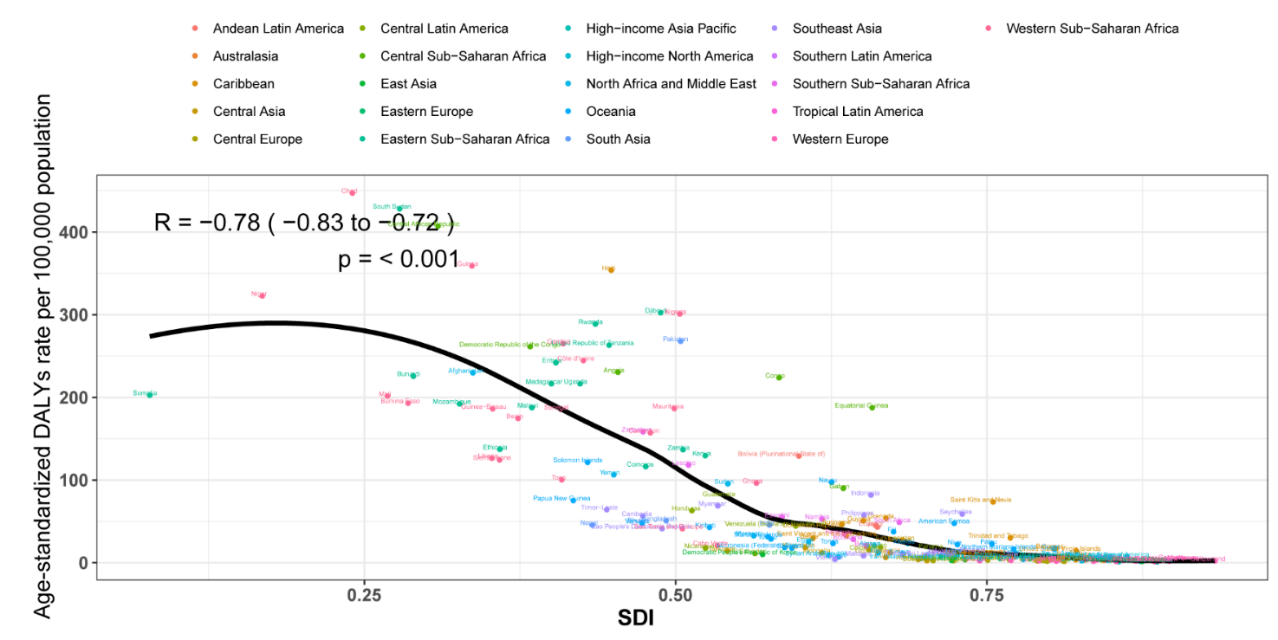


**Figure S12.** Age-standardized DALYs rate of MHD for 204 countries and territories by SDI in 2021. DALYs: disability-adjusted life years; MHD: maternal hypertensive disorder; SDI: sociodemographic index.


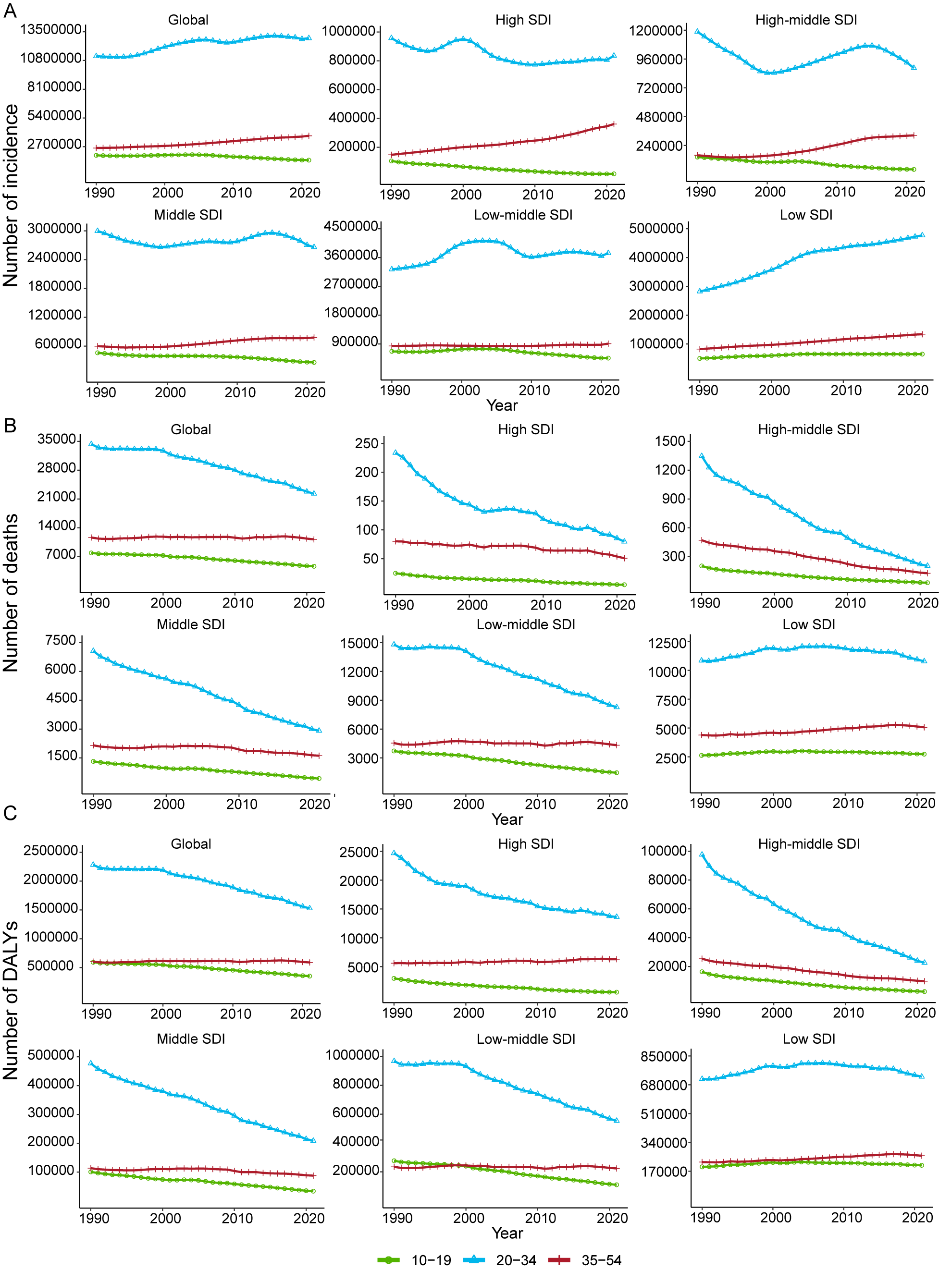


**Figure S13.** The number of MHD burden across different age groups in different regions from 1990 to 2021. (A) Number of incidences; (B) Number of deaths; (C) Number of DALYs. MHD: maternal hypertensive disorder; SDI: sociodemographic index; DALYs: disability-adjusted life years.


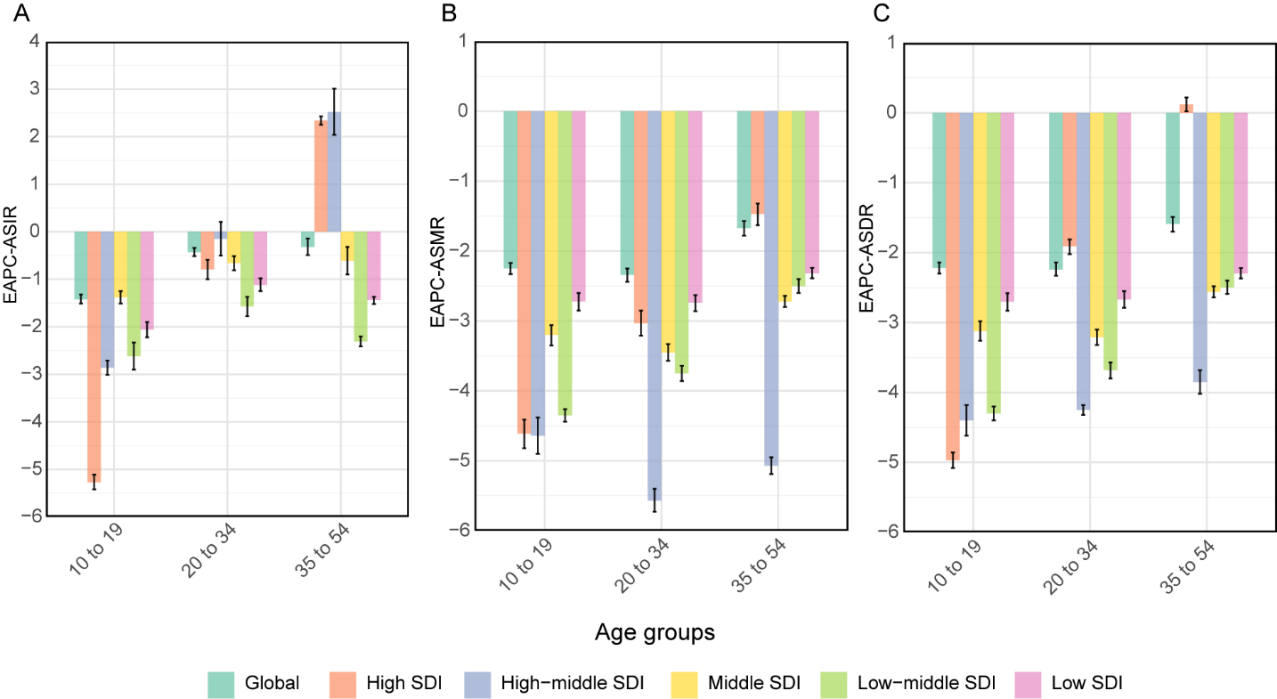


**Figure S14.** EAPC of ASIR, ASMR, and ASDR for MHD from 1990 to 2021 by different age groups and regions. (A) EAPC in ASIR. (B) EAPC in ASMR. (B) EAPC in ASDR. EAPC: estimated annual percentage change; ASIR: age-standardized incidence rate; ASMR: age-standardized mortality rate; ASDR: age-standardized DALYs rate; DALYs: disability-adjusted life years; MHD: maternal hypertensive disorder; SDI: sociodemographic index.


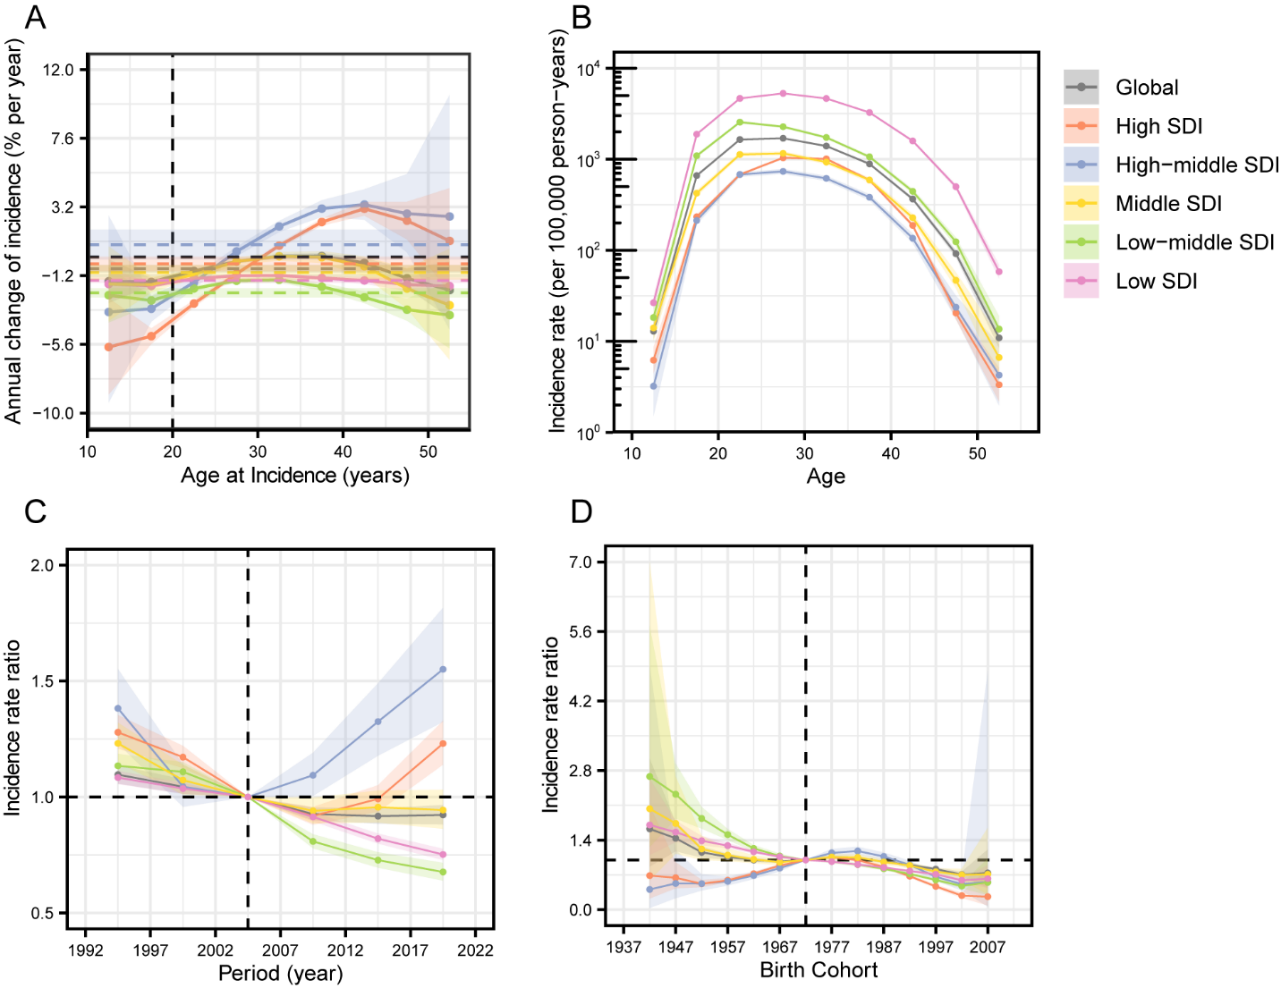


**Figure S15.** Local drifts of MHD incidence with the age, period, and cohort effects by SDI quintiles, 1992−2021. (A) Local drifts of MHD incidence (estimates from age-period-cohort models) for 9 age groups (10−14 to 50−54 years), 1992−2021. The dots and shaded areas indicate the annual percentage change of incidence (% per year) and the corresponding 95% CIs. (B) Age effects are shown by the fitted longitudinal age curves of incidence (per 100,000 person-years) adjusted for period deviations. The dots and shaded areas denote incidence rates or rate ratios and their corresponding 95% CIs. (C) Period effects are shown by the relative risk of incidence (incidence rate ratio) and computed as the ratio of age-specific rates from 1992 to 1996 (the referent period) to 2017−2021. The dots and shaded areas denote incidence rates or rate ratios and their corresponding 95% CIs. (D) Cohort effects are shown by the relative risk of incidence and computed as the ratio of age-specific rates from the 1942 cohort to the 2007 cohort, with the referent cohort set at 1972. The dots and shaded areas denote incidence rates or rate ratios and their corresponding 95% CIs. MHD: maternal hypertensive disorder; SDI: sociodemographic index.


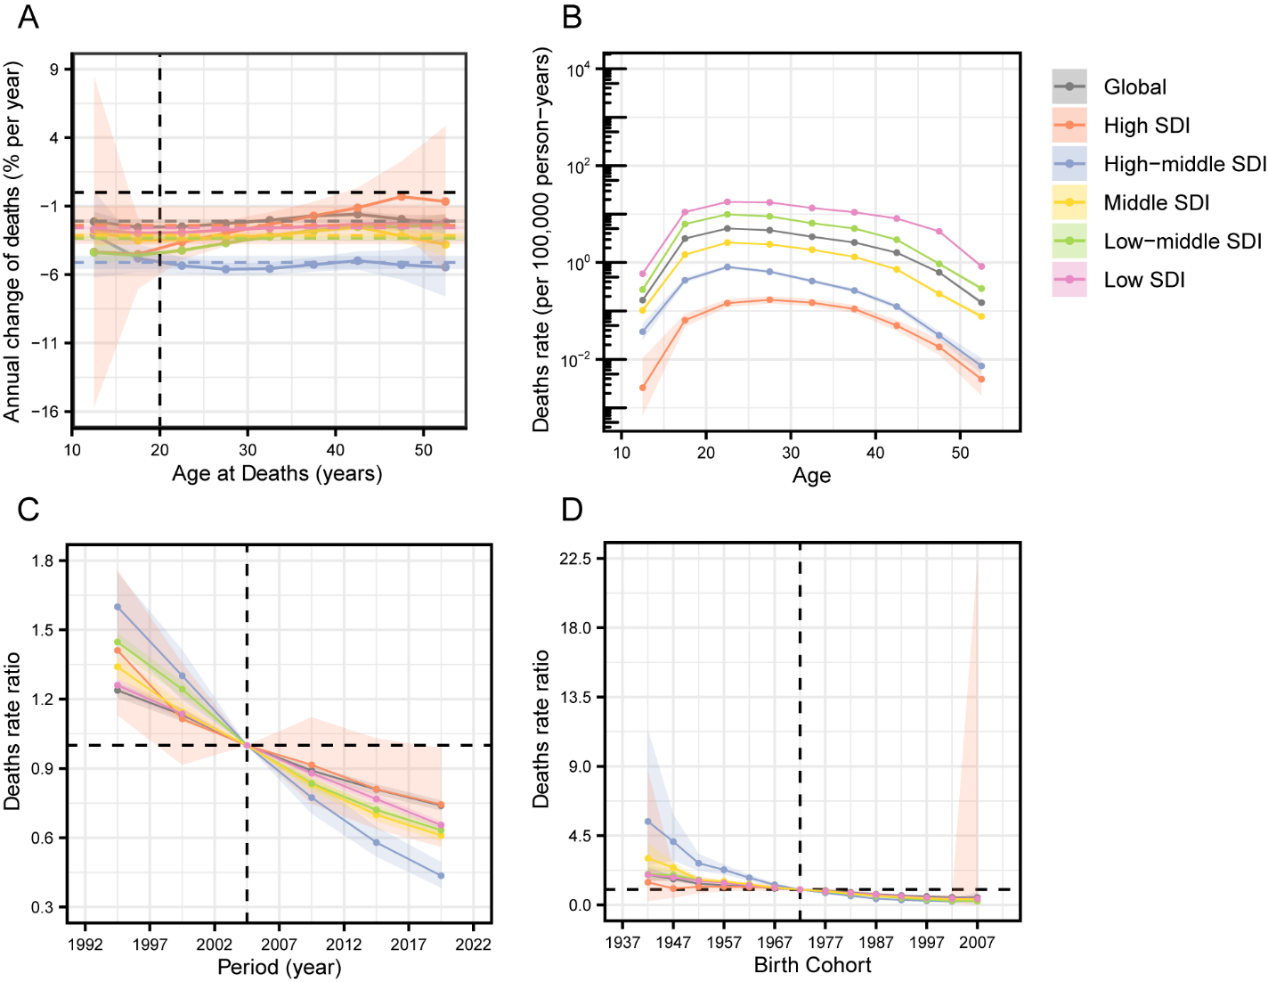


**Figure S16.** Local drifts of MHD deaths with the age, period, and cohort effects by SDI quintiles, 1992−2021. (A) Local drifts of MHD deaths (estimates from age-period-cohort models) for 9 age groups (10−14 to 50−54 years), 1992−2021. The dots and shaded areas deaths the annual percentage change of mortality (% per year) and the corresponding 95% CIs. (B) Age effects are shown by the fitted longitudinal age curves of deaths (per 100,000 person-years) adjusted for period deviations. The dots and shaded areas denote deaths rates or rate ratios and their corresponding 95% CIs. (C) Period effects are shown by the relative risk of deaths (deaths rate ratio) and computed as the ratio of age-specific rates from 1992 to 1996 (the referent period) to 2017−2021. The dots and shaded areas denote deaths rates or rate ratios and their corresponding 95% CIs. (D) Cohort effects are shown by the relative risk of deaths and computed as the ratio of age-specific rates from the 1942 cohort to the 2007 cohort, with the referent cohort set at 1972. The dots and shaded areas denote deaths rates or rate ratios and their corresponding 95% CIs. MHD: maternal hypertensive disorder; SDI: sociodemographic index.


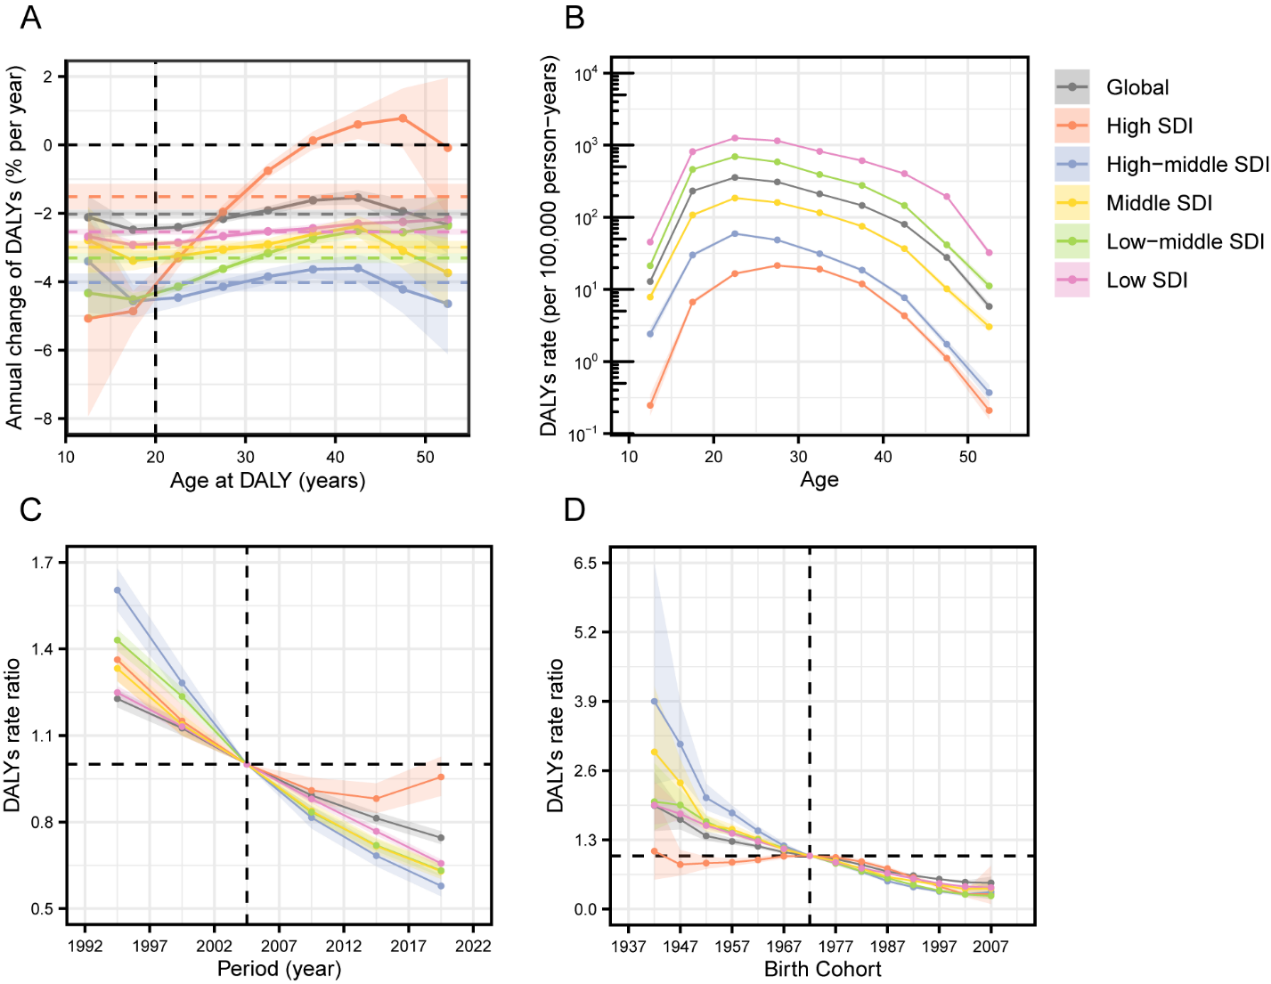


**Figure S17.** Local drifts of MHD DALYs with the age, period, and cohort effects by SDI quintiles, 1992−2021. (A) Local drifts of MHD DALYs (estimates from age-period-cohort models) for 9 age groups (10−14 to 50−54 years), 1992−2021. The dots and shaded areas indicate the annual percentage change of DALYs (% per year) and the corresponding 95% CIs. (B) Age effects are shown by the fitted longitudinal age curves of DALYs (per 100,000 person-years) adjusted for period deviations. The dots and shaded areas denote DALYs rates or rate ratios and their corresponding 95% CIs. (C) Period effects are shown by the relative risk of DALYs (DALYs rate ratio) and computed as the ratio of age-specific rates from 1992 to 1996 (the referent period) to 2017−2021. The dots and shaded areas denote DALYs rates or rate ratios and their corresponding 95% CIs. (D) Cohort effects are shown by the relative risk of DALYs and computed as the ratio of age-specific rates from the 1942 cohort to the 2007 cohort, with the referent cohort set at 1972. The dots and shaded areas denote DALYs rates or rate ratios and their corresponding 95% CIs. MHD: maternal hypertensive disorder; DALYs: disability-adjusted life years; SDI: sociodemographic index.


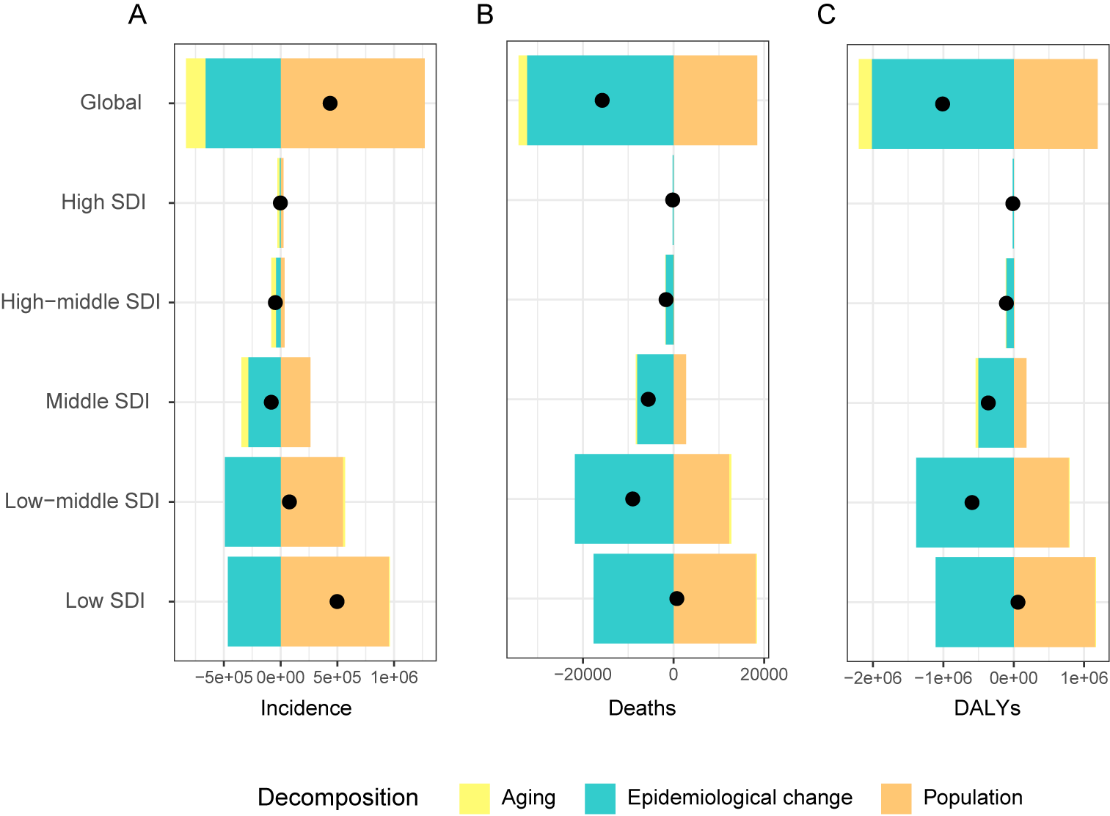


**Figure S18.** Decomposition analysis of incidence, deaths, and DALYs due to MHD across different regions from 1990–2021. (A) Changes in incidence. (B) Changes in deaths. (B) Changes in DALYs. DALYs: disability-adjusted life years; MHD: maternal hypertensive disorder; SDI: sociodemographic index.


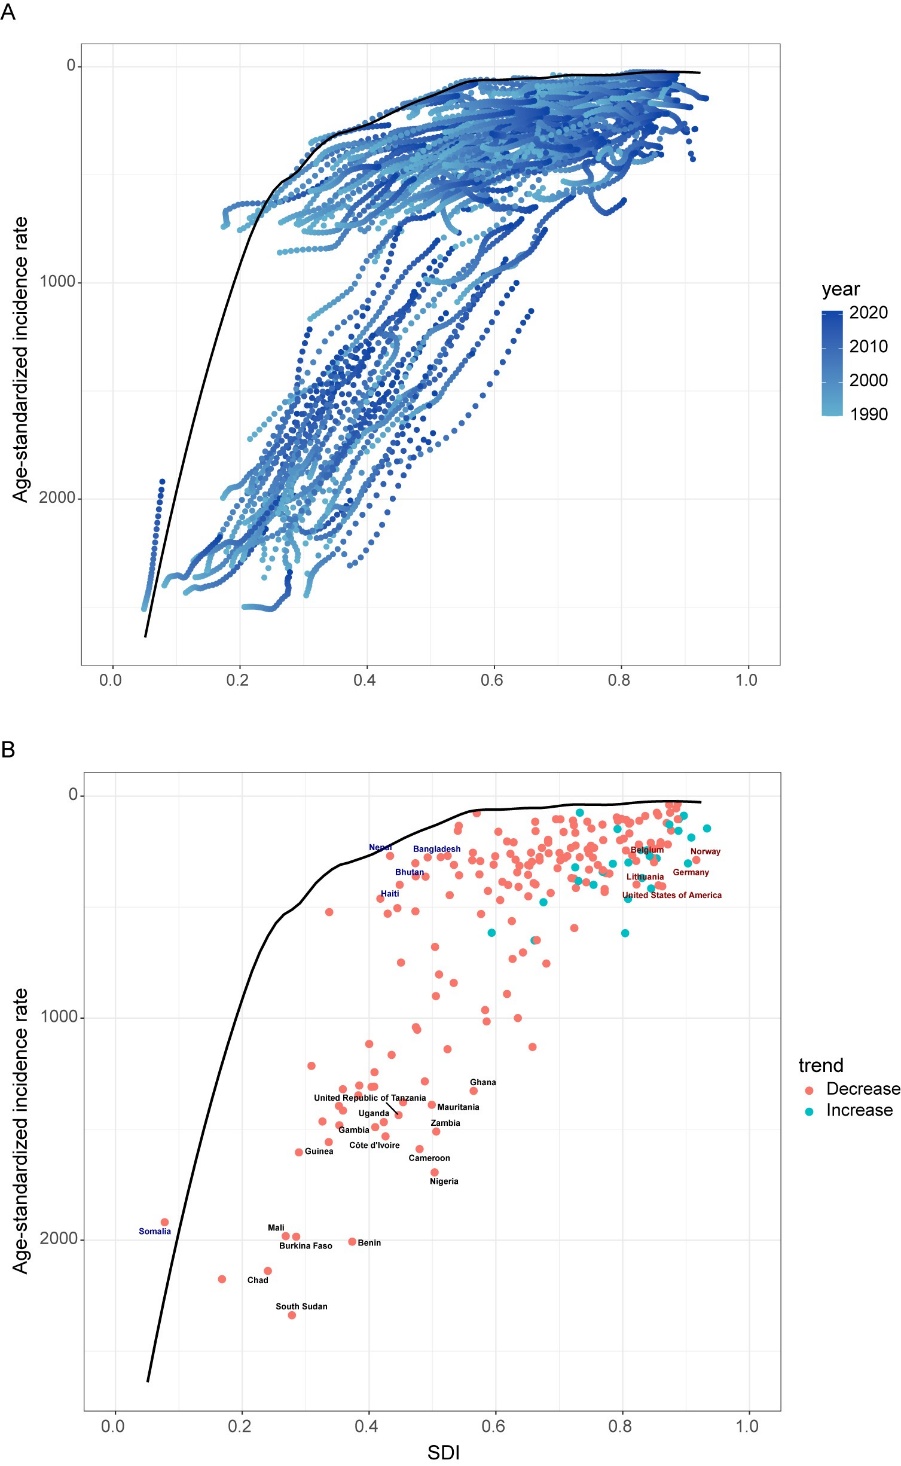


**Figure S19.** Frontier analysis based on SDI and age-standardized incidence rate of MHD from 1990 to 2021 (A) and their correlation in 2021 (B). Black solid lines delineate the frontier line, and black dots indicate the countries and territories. Black labels represent the top 15 countries with the largest effective difference (largest age-standardized incidence rate gap from the frontier). Blue labels represent frontier countries with low SDI and small effective difference (e.g., Somalia, Nepal, Bangladesh, Bhutan, Haiti), while red labels indicate countries and territories with high SDI and relatively large effective difference for their level of development (e.g., United States of America, Lithuania, Germany, Norway, Belgium). A Red dot indicates an increase in age-standardized incidence rate between 1990 and 2021, and a blue dot indicates a decrease. SDI: sociodemographic index; MHD: maternal hypertensive disorder.


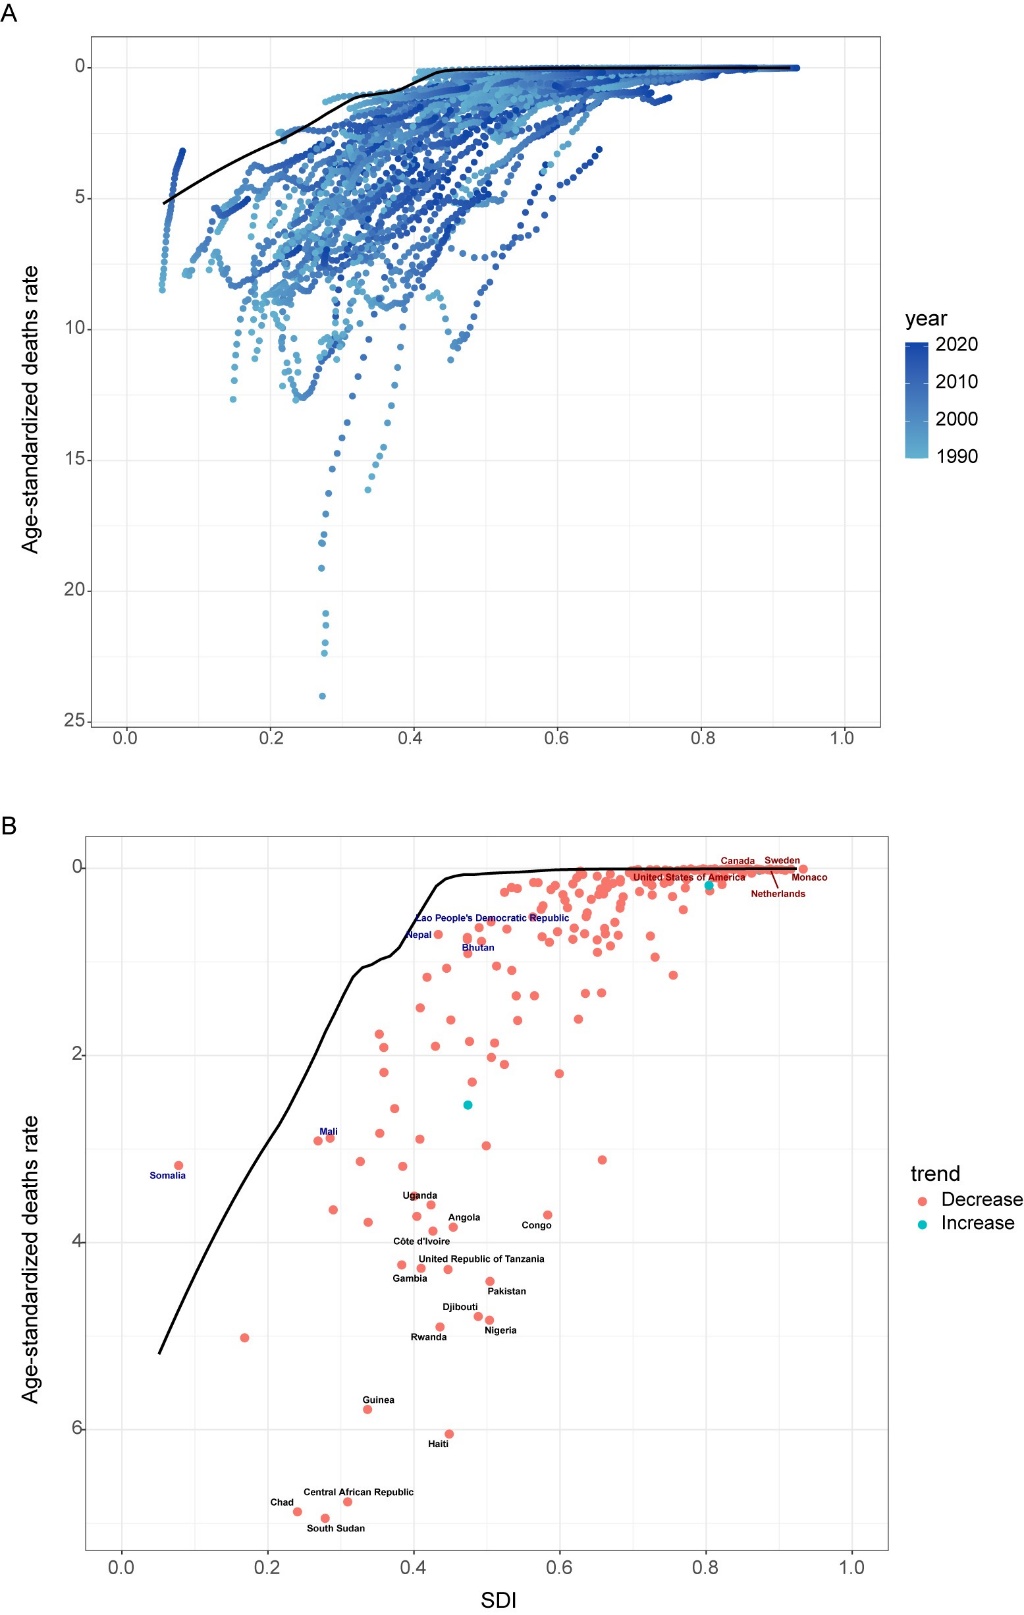


**Figure S20.** Frontier analysis based on SDI and age-standardized deaths rate of MHD from 1990 to 2021 (A) and their correlation in 2021 (B). Black solid lines delineate the frontier line, and black dots indicate the countries and territories. Black labels represent the top 15 countries with the largest effective difference (largest age-standardized deaths rate gap from the frontier). Blue labels represent frontier countries with low SDI and small effective difference (e.g., Somalia, Nepal, Lao People's Democratic Republic, Mali, Bhutan), while red labels indicate countries and territories with high SDI and relatively large effective difference for their level of development (e.g., United States of America, Monaco, Canada, Netherlands, Sweden). A Red dot indicates an increase in age-standardized deaths rate between 1990 and 2021, and a blue dot indicates a decrease. SDI: sociodemographic index; MHD: maternal hypertensive disorder.


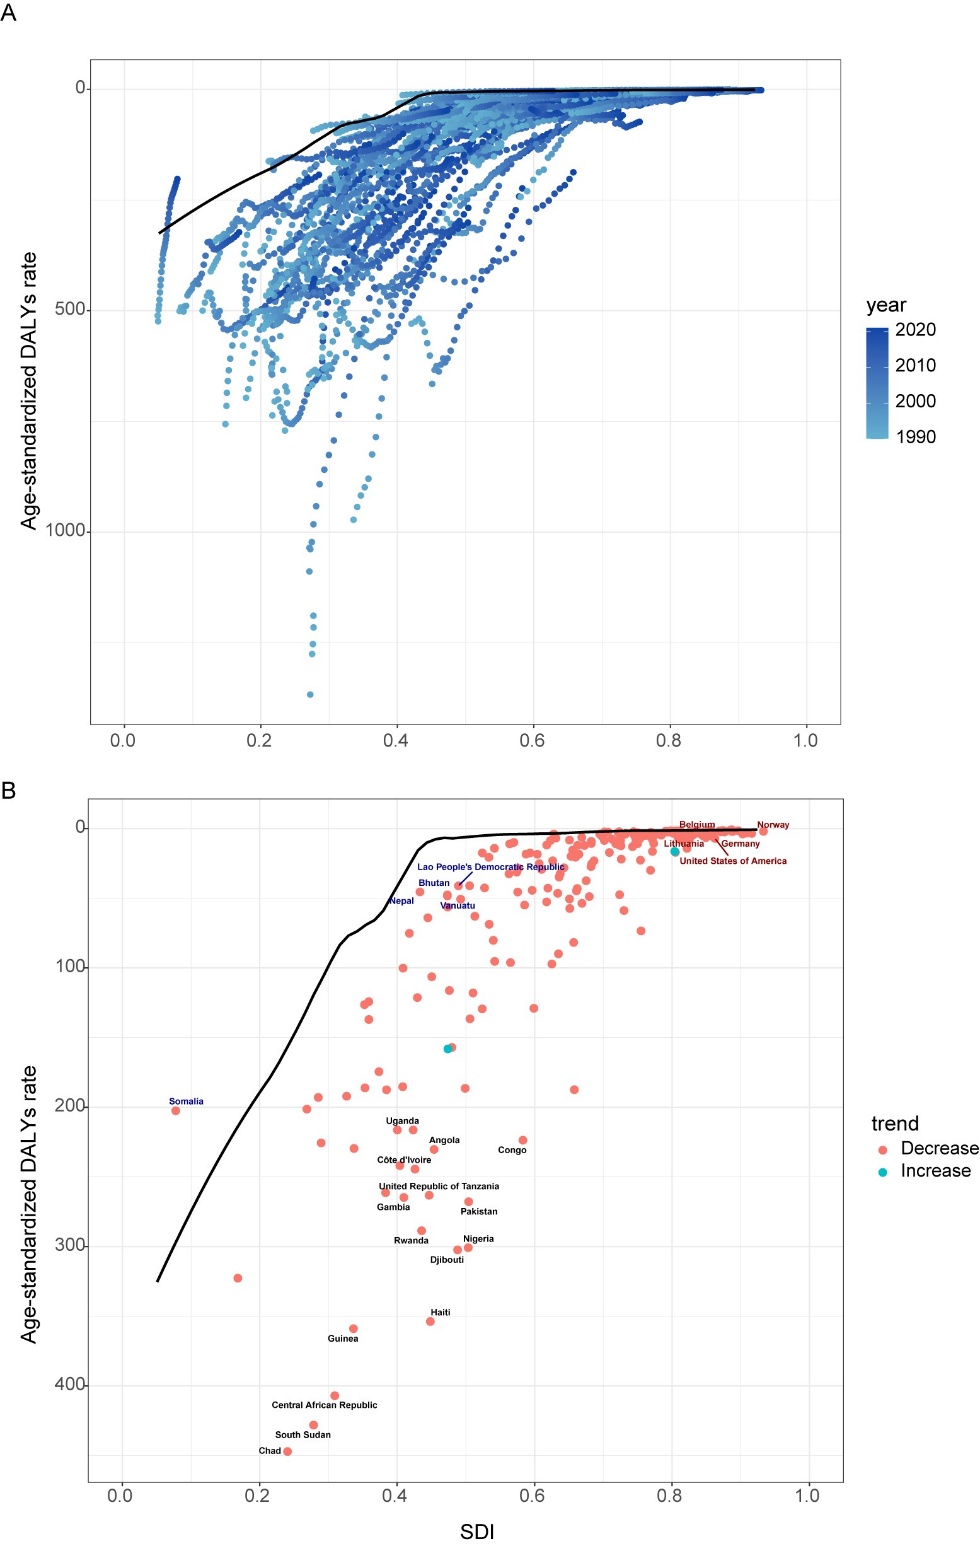


**Figure S21.** Frontier analysis based on SDI and age-standardized DALYs rate of MHD from 1990 to 2021 (A) and their correlation in 2021 (B). Black solid lines delineate the frontier line, and black dots indicate the countries and territories. Black labels represent the top 15 countries with the largest effective difference (largest age-standardized DALYs rate gap from the frontier). Blue labels represent frontier countries with low SDI and small effective difference (e.g., Somalia, Nepal, Lao People's Democratic Republic, Vanuatu, Bhutan), while red labels indicate countries and territories with high SDI and relatively large effective difference for their level of development (e.g., United States of America, Lithuania, Germany, Norway, Belgium). A Red dot indicates an increase in age-standardized DALYs rate between 1990 and 2021, and a blue dot indicates a decrease. SDI: sociodemographic index; DALYs: disability-adjusted life years; MHD: maternal hypertensive disorder.
